# Supplementary material
Source: Research Square preprint supplement (doi:10.21203/rs.3.rs-10336388/v1)
Supplement: Supplementary file 1 [file ff9d7e619847d8278f71cc25.docx]

Spatiotemporal variability of extreme precipitation in Ecuador (1991-2020): Wavelet coherence and non-parametric trend analysis by homogeneous zones

Zone 1


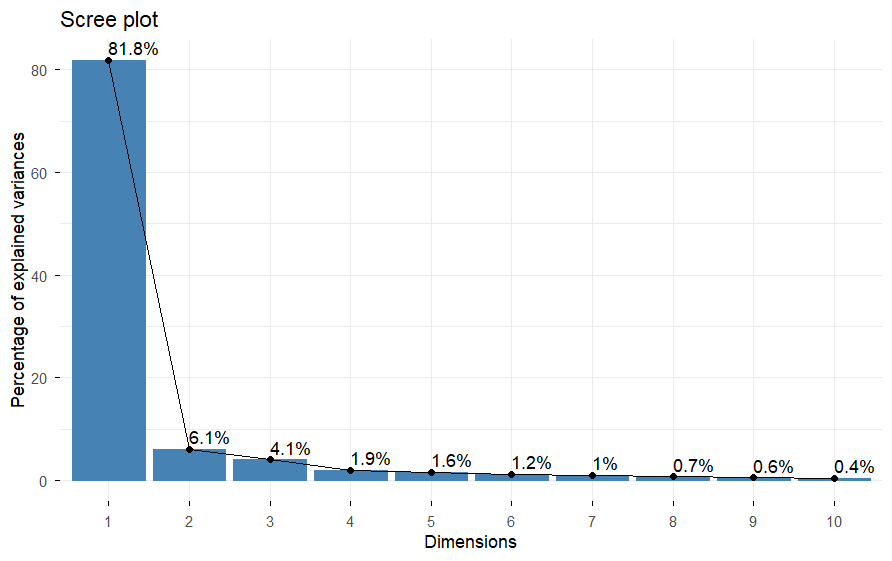


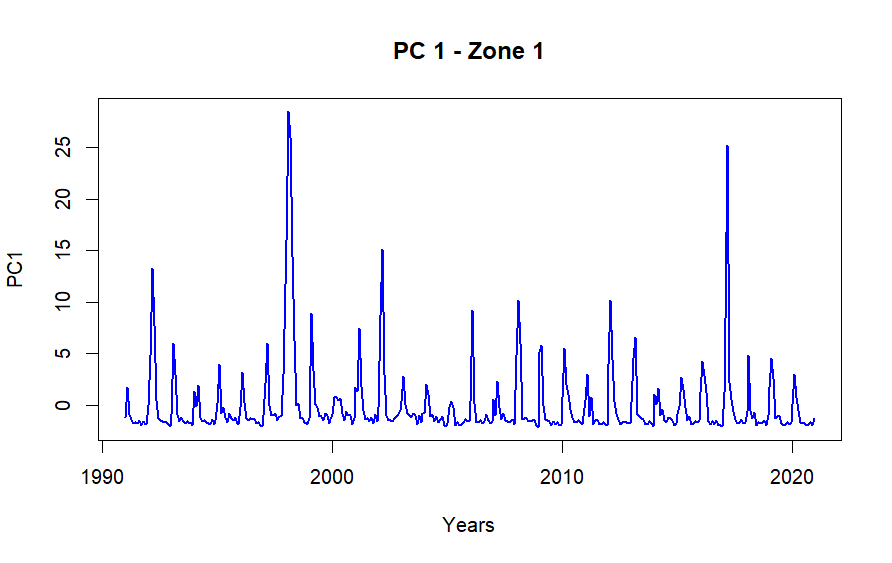

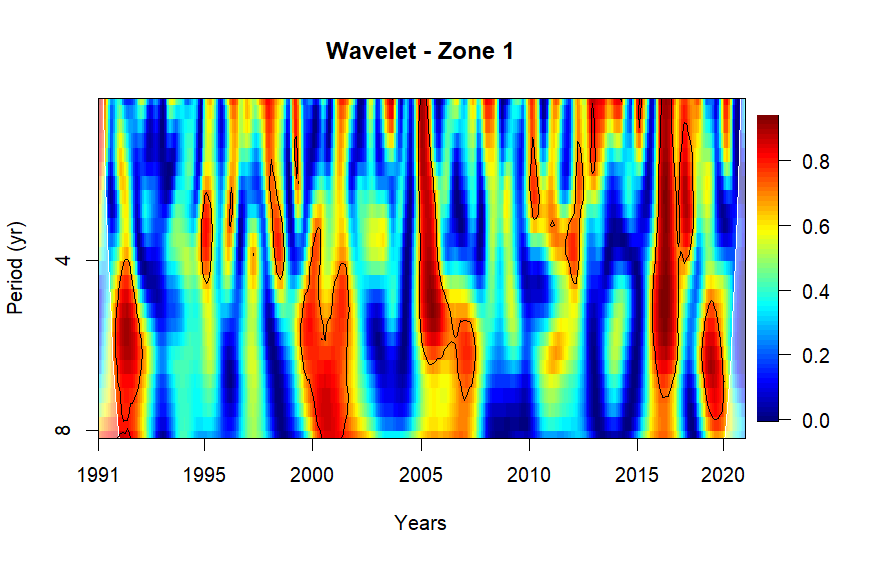

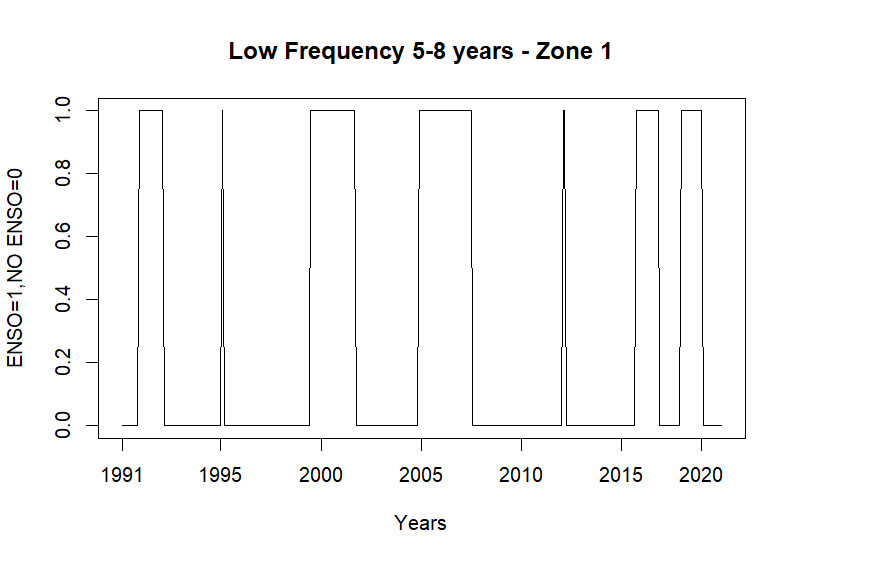

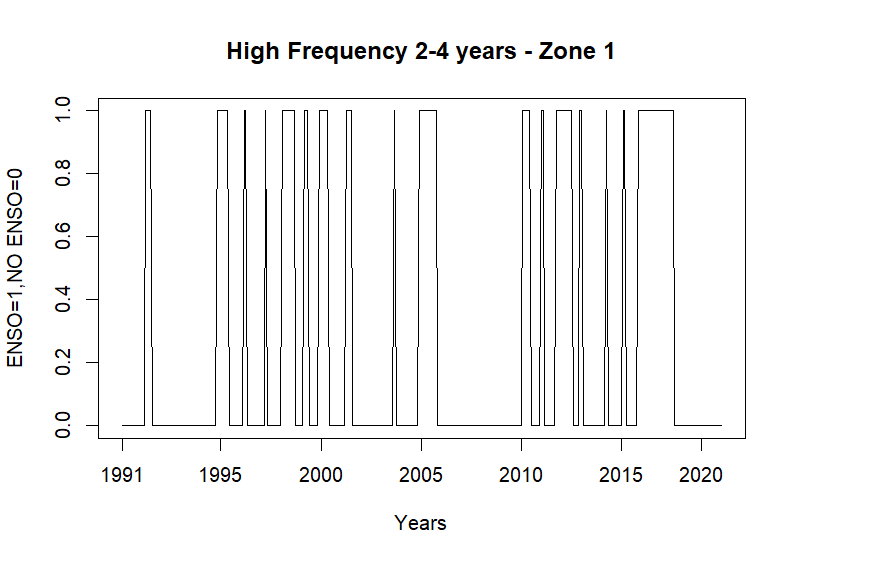

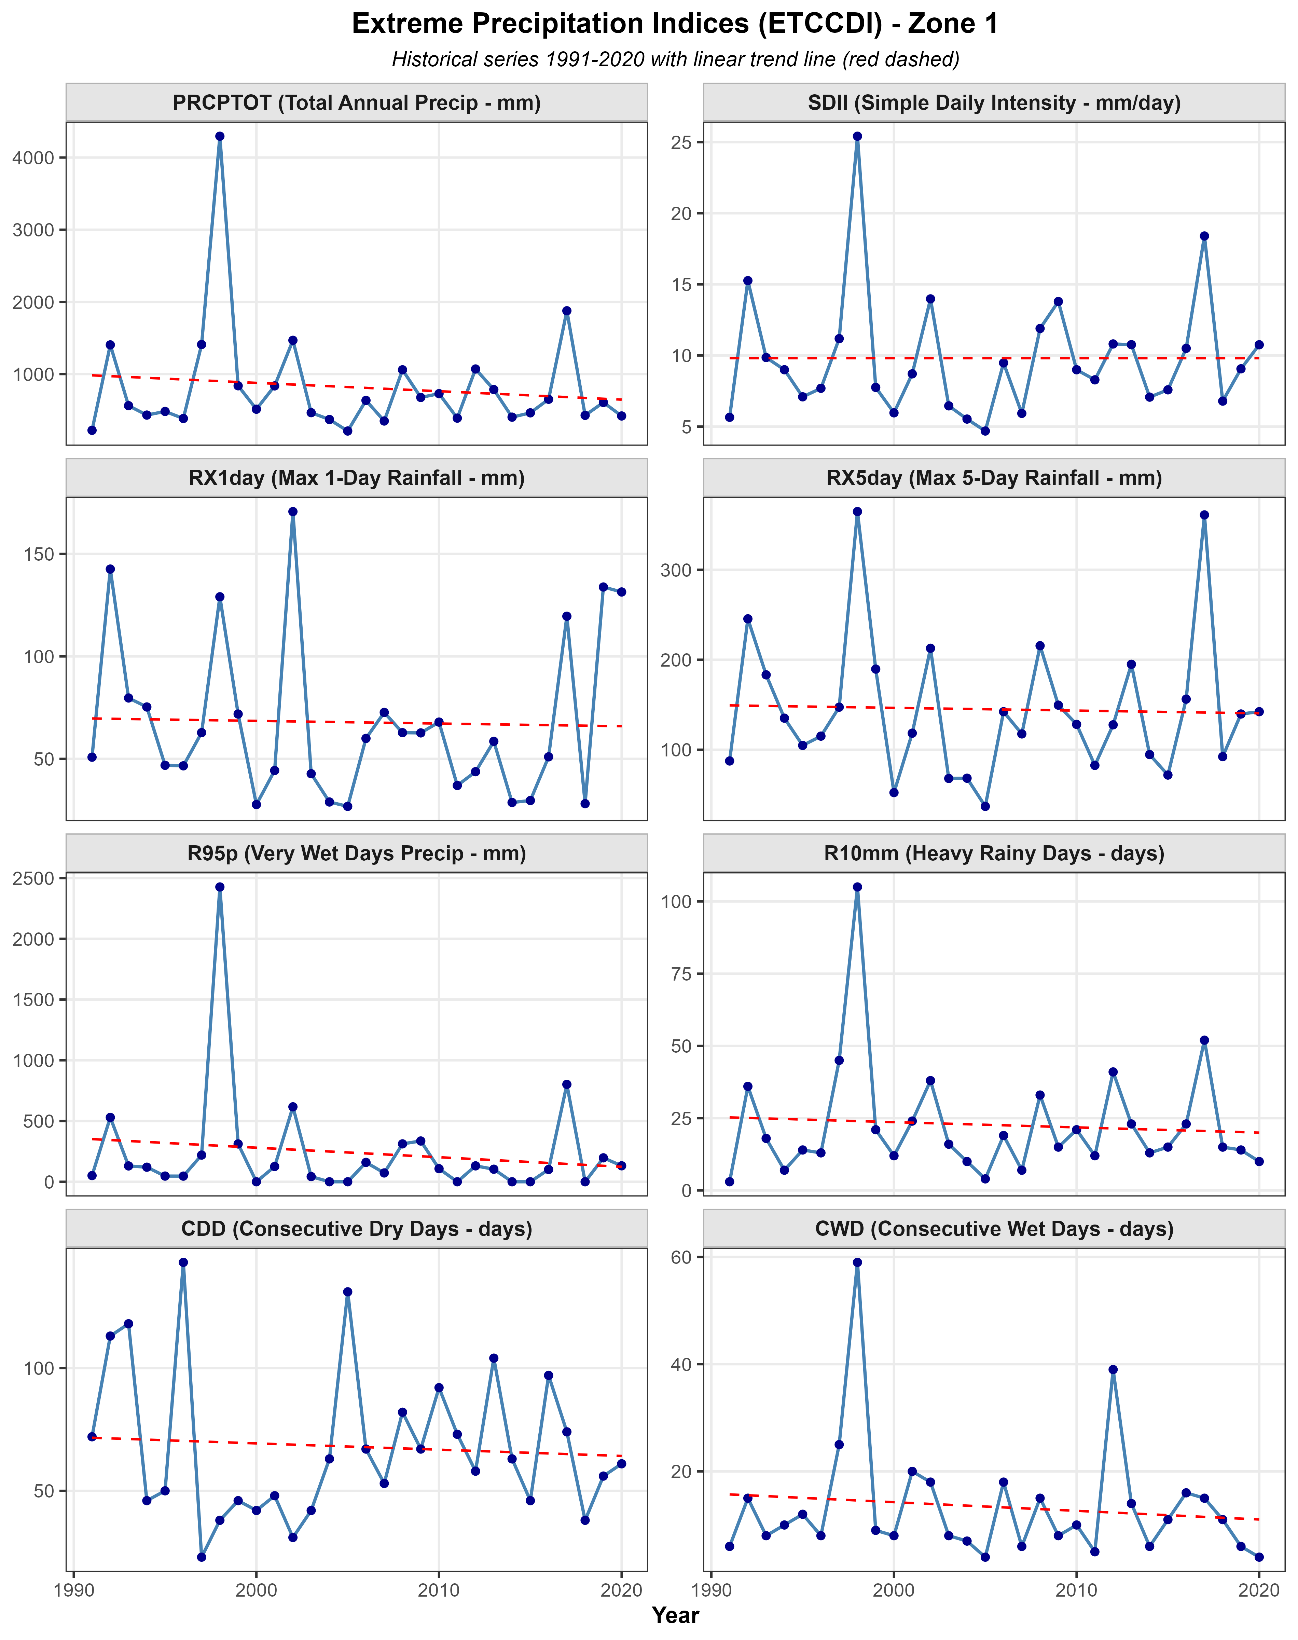


Zone 2


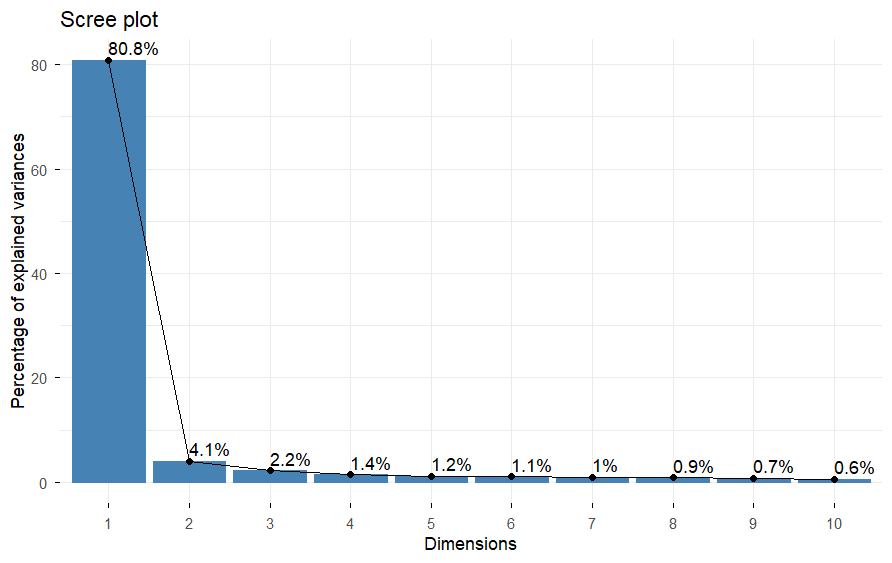

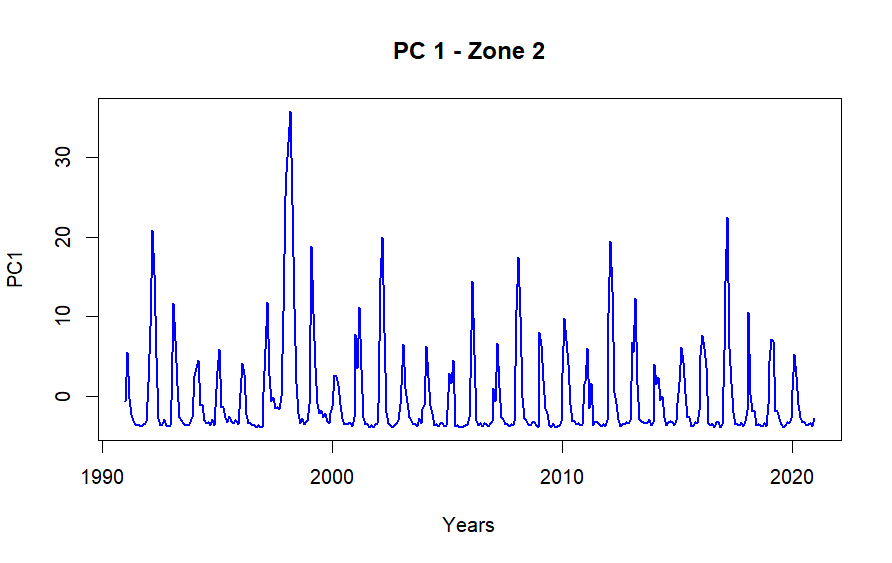

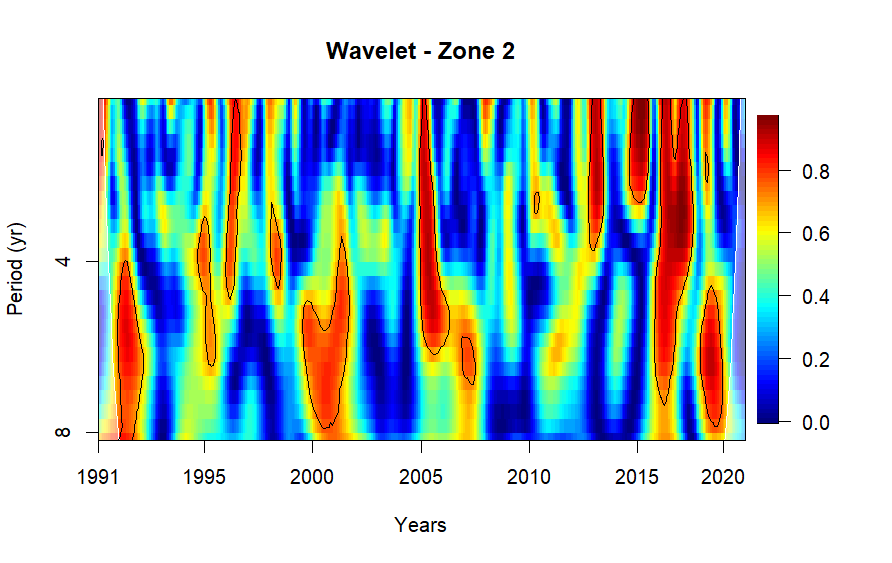


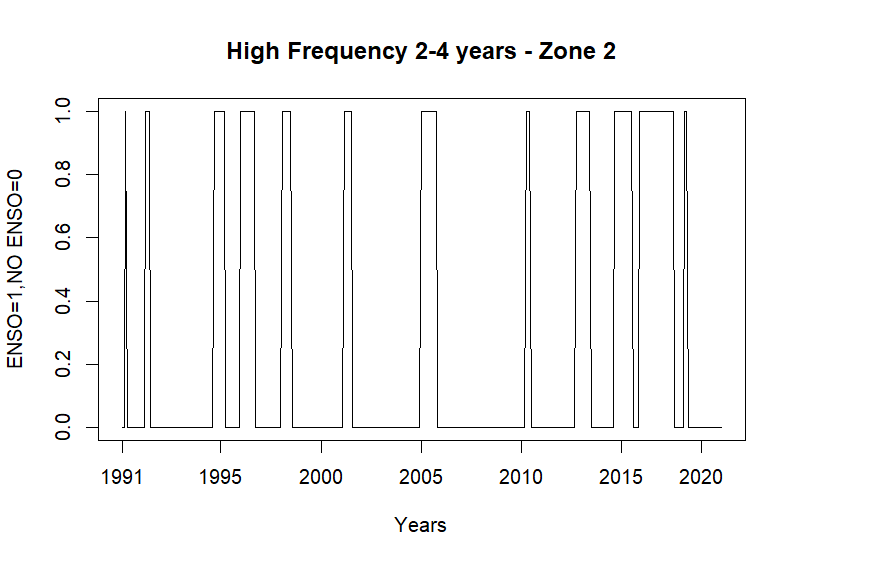

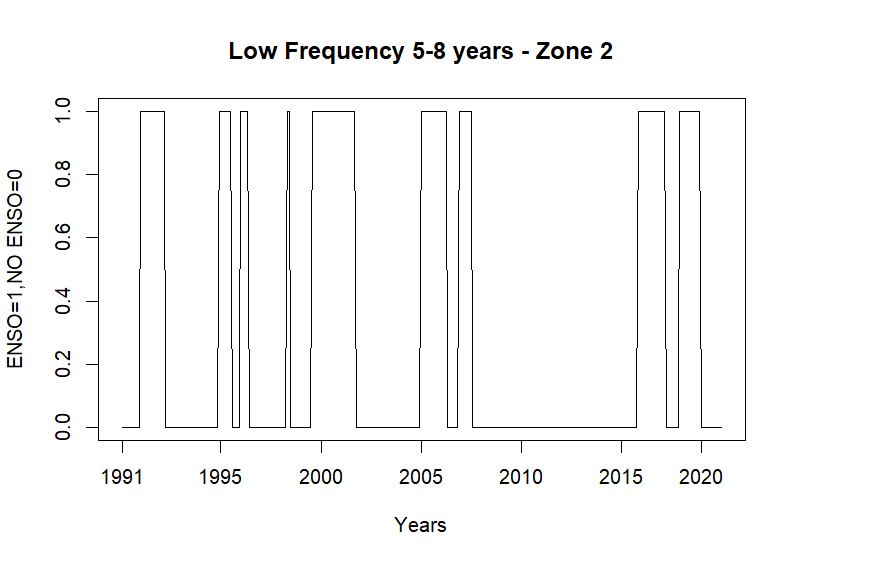


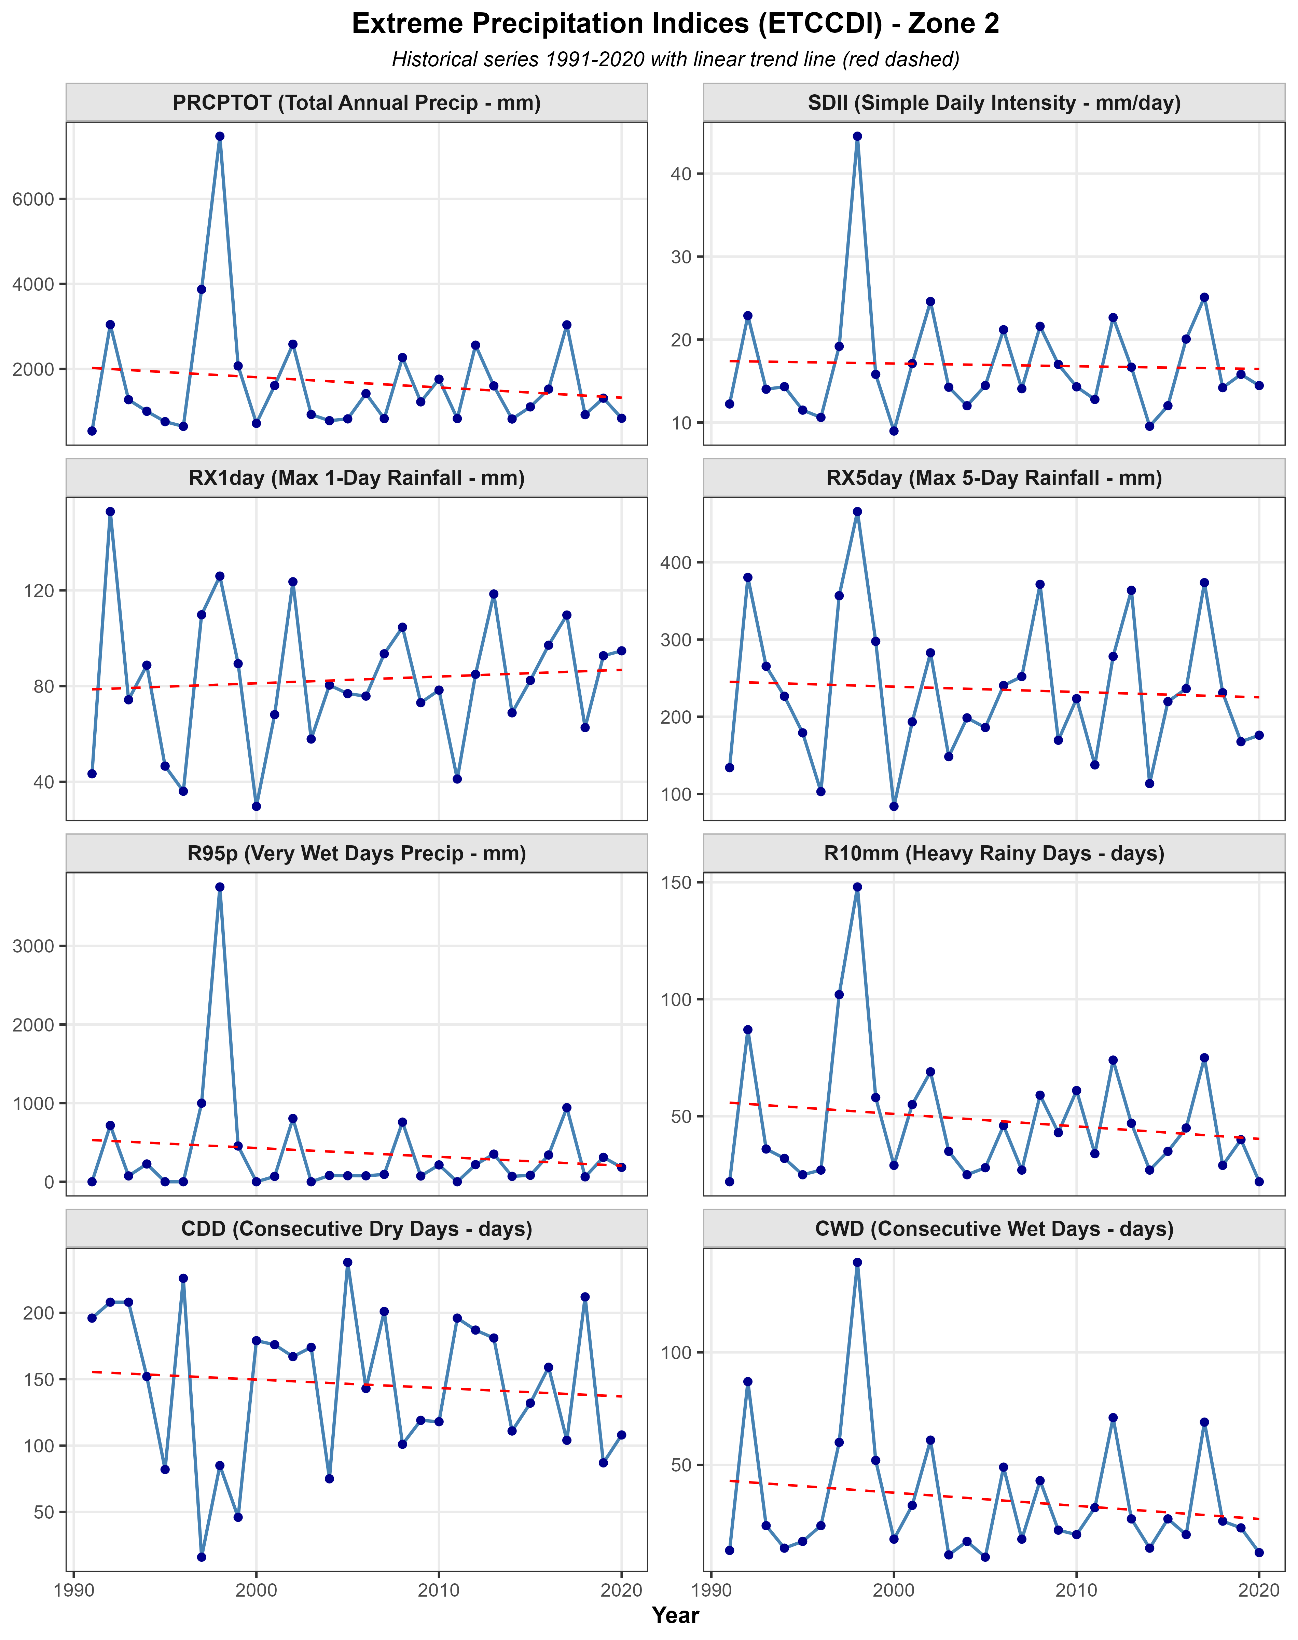


Zone 3


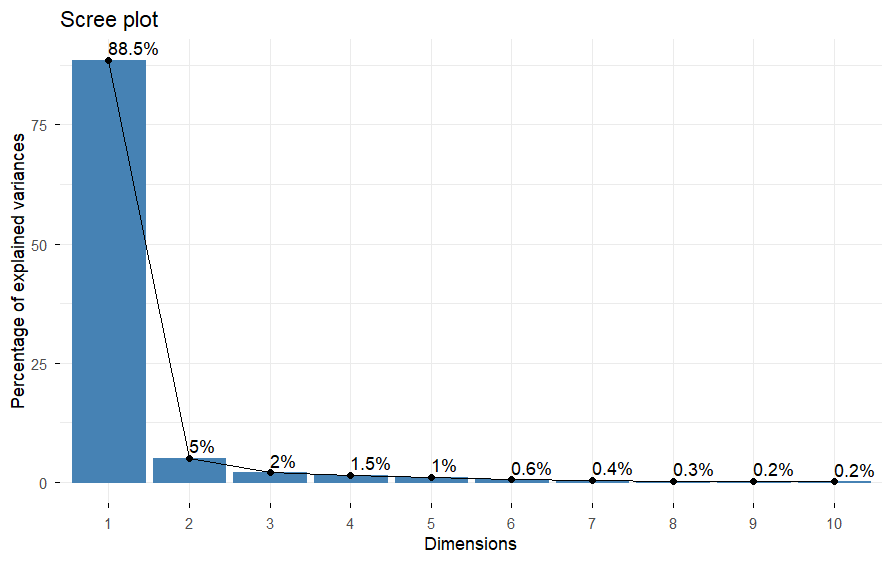

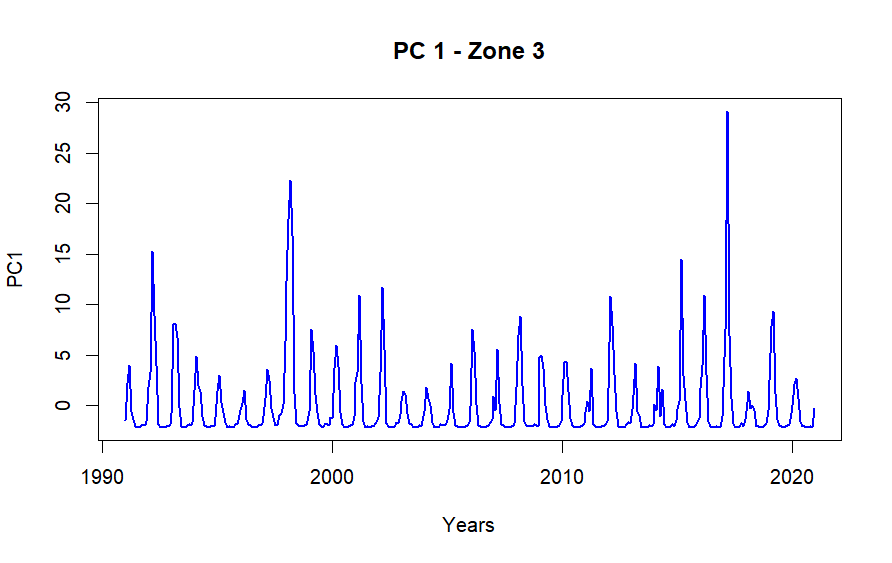


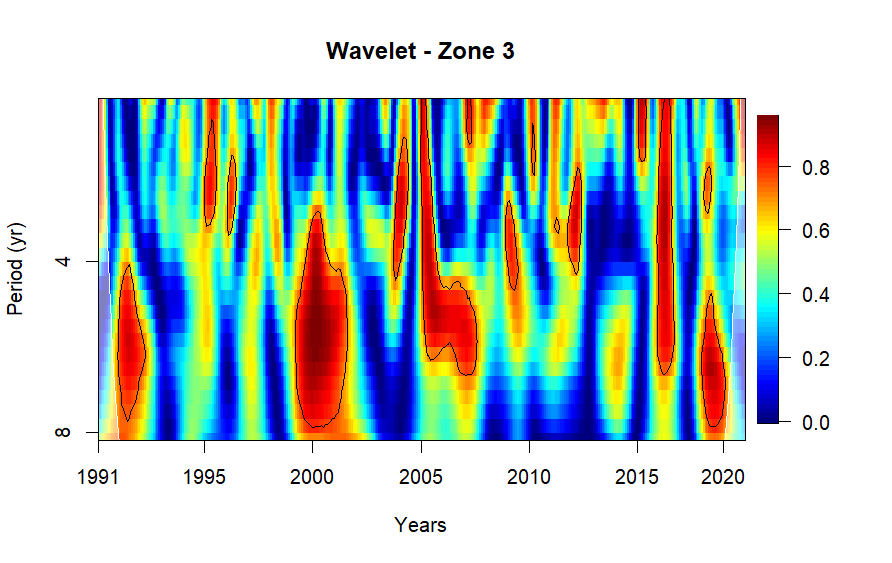


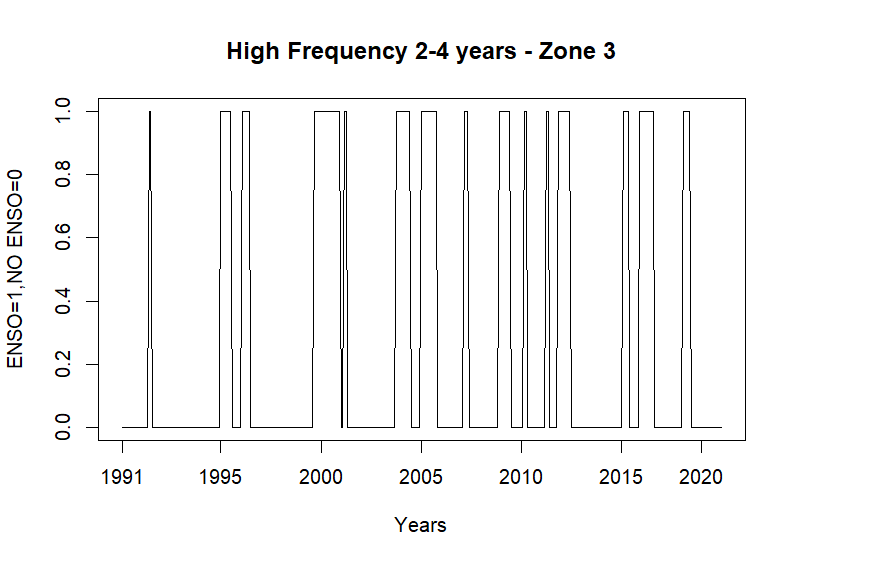

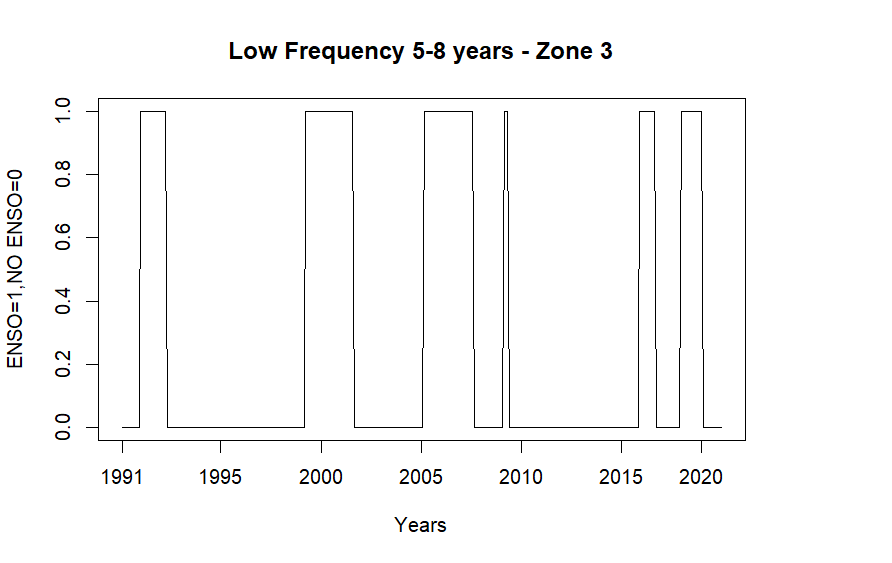


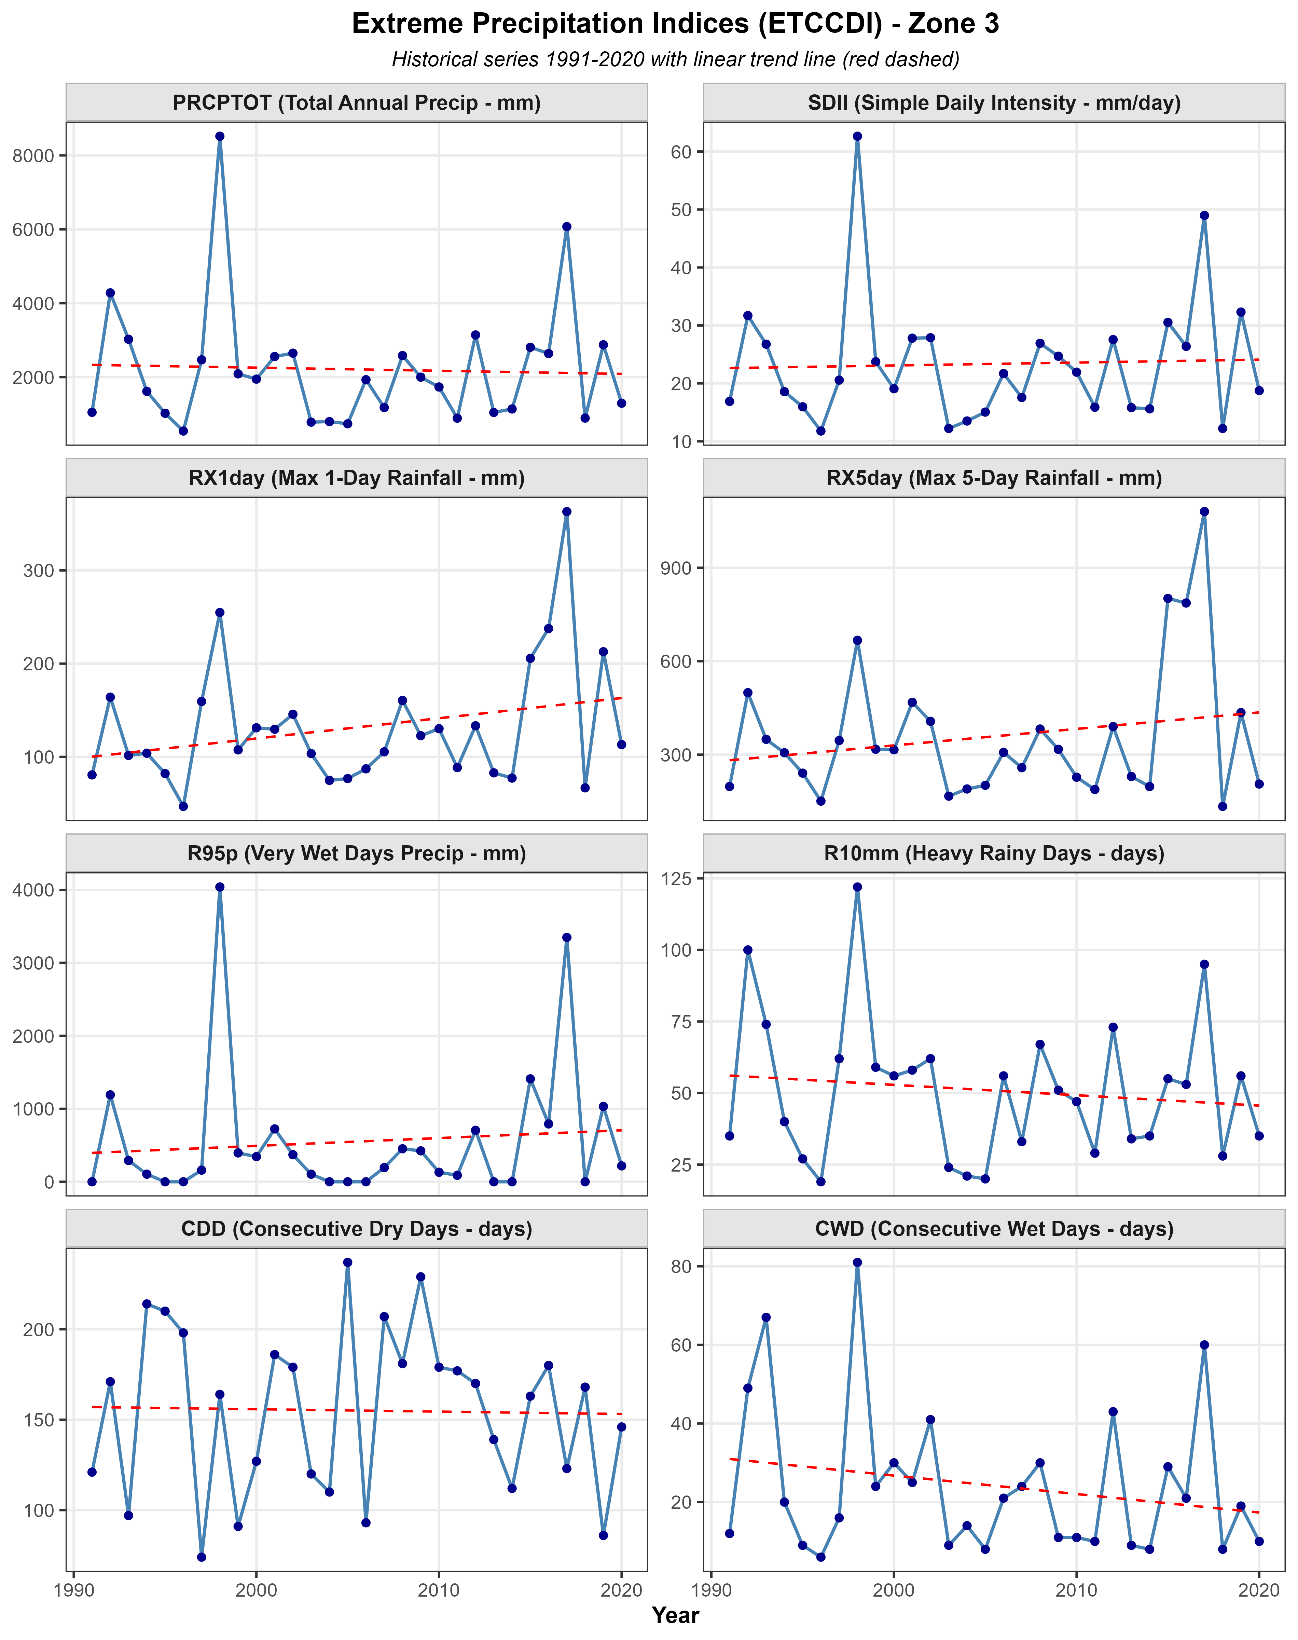


Zone 4


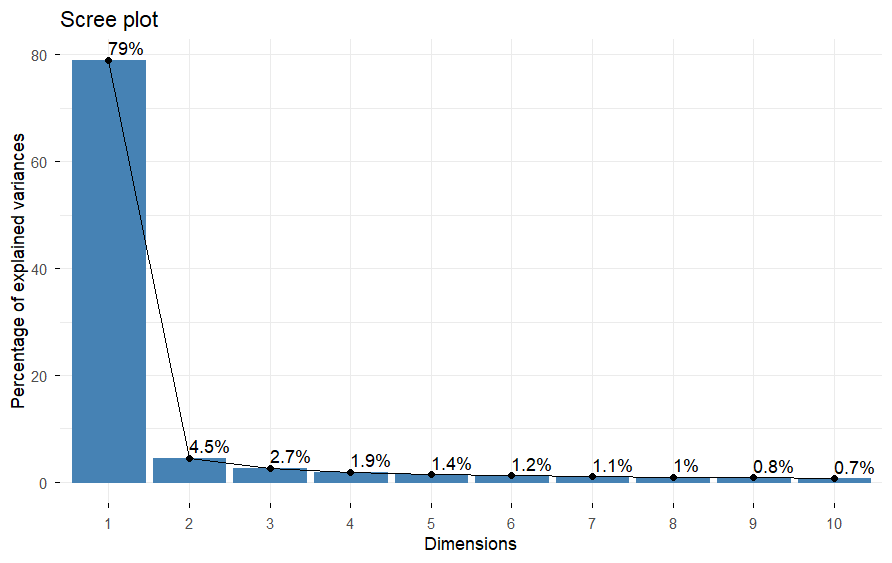

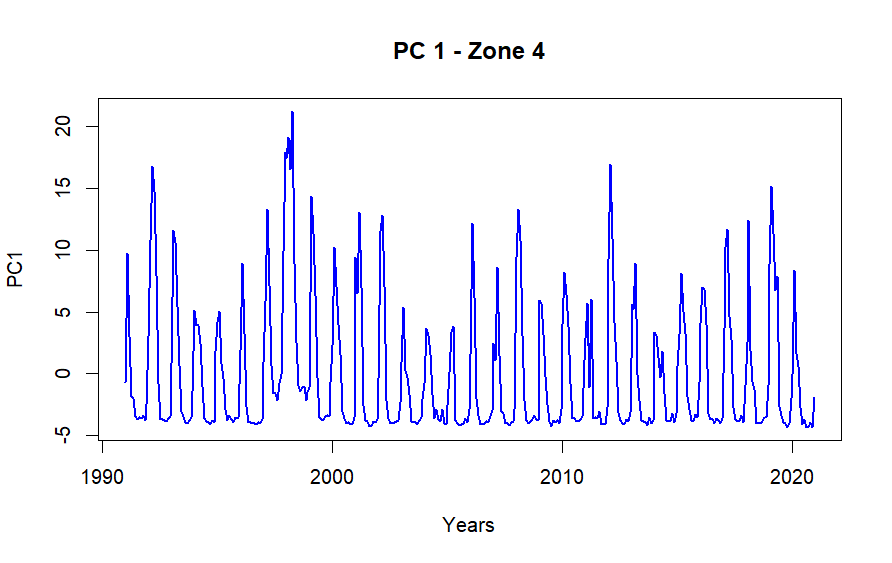

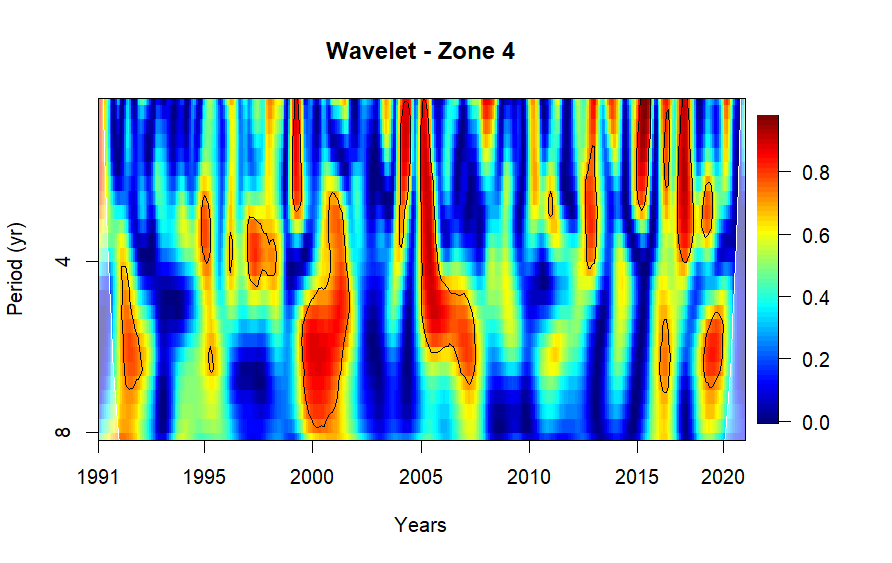

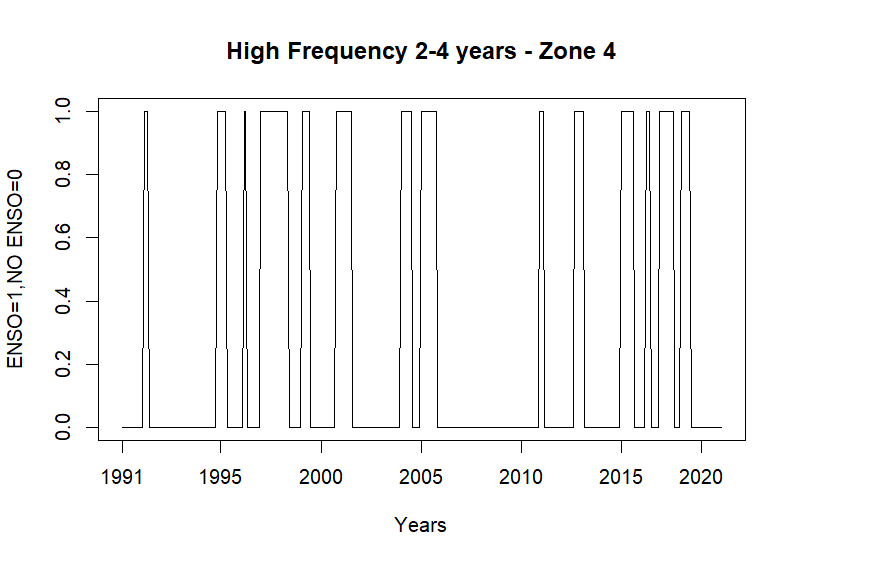

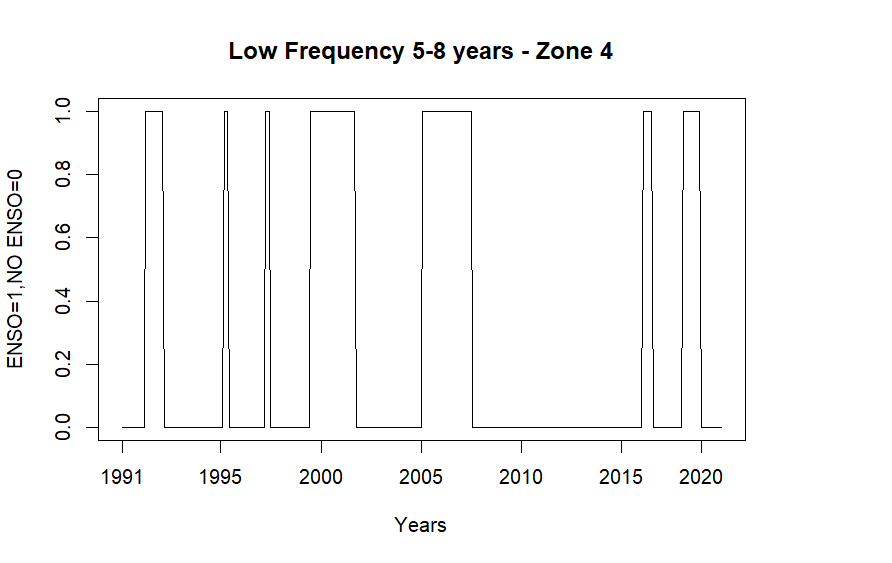


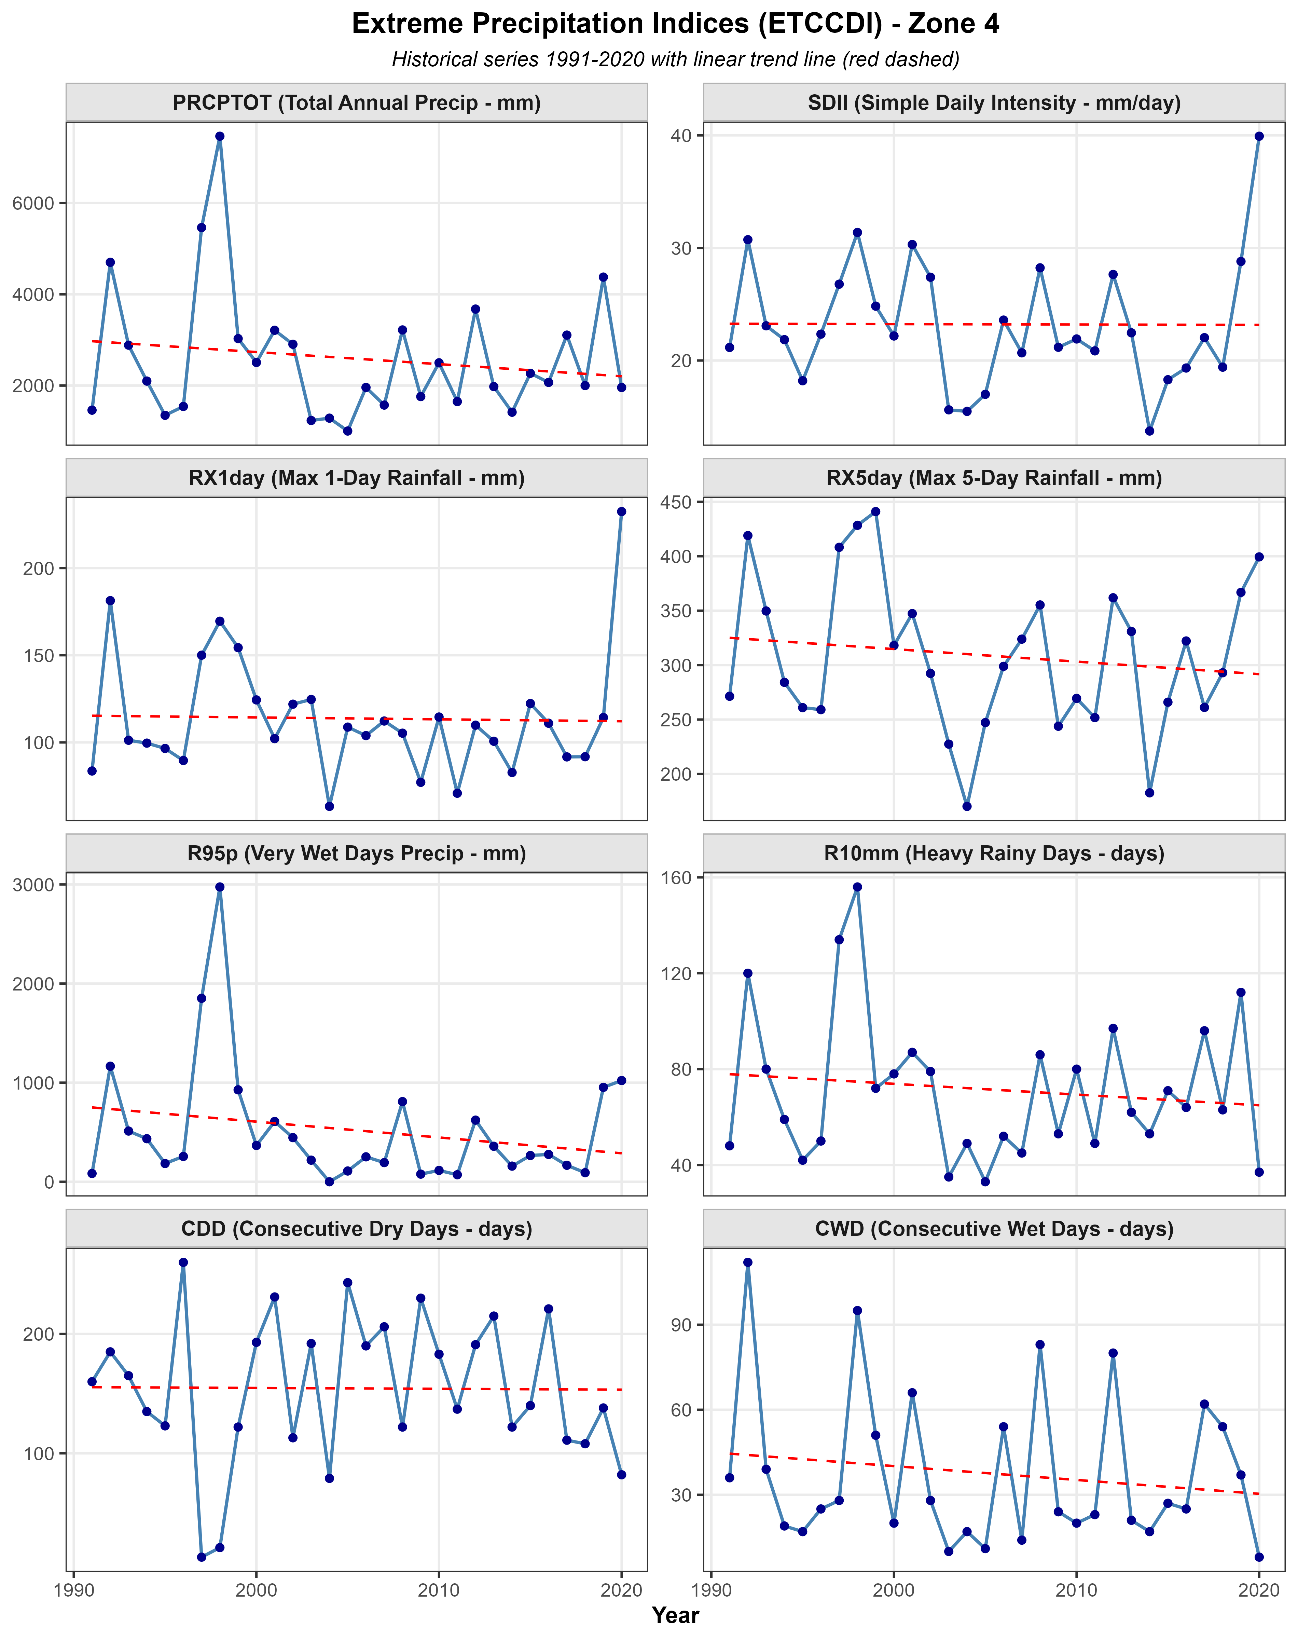


Zone 5


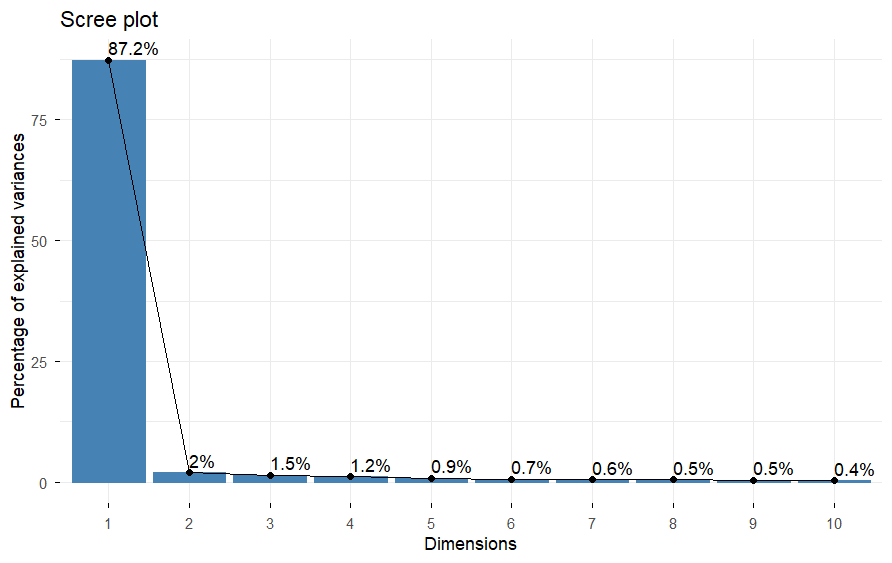

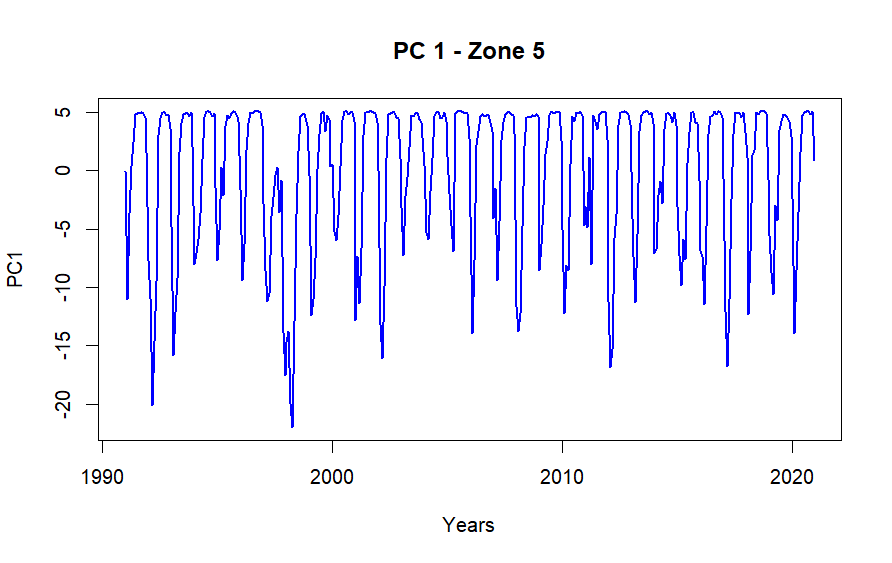

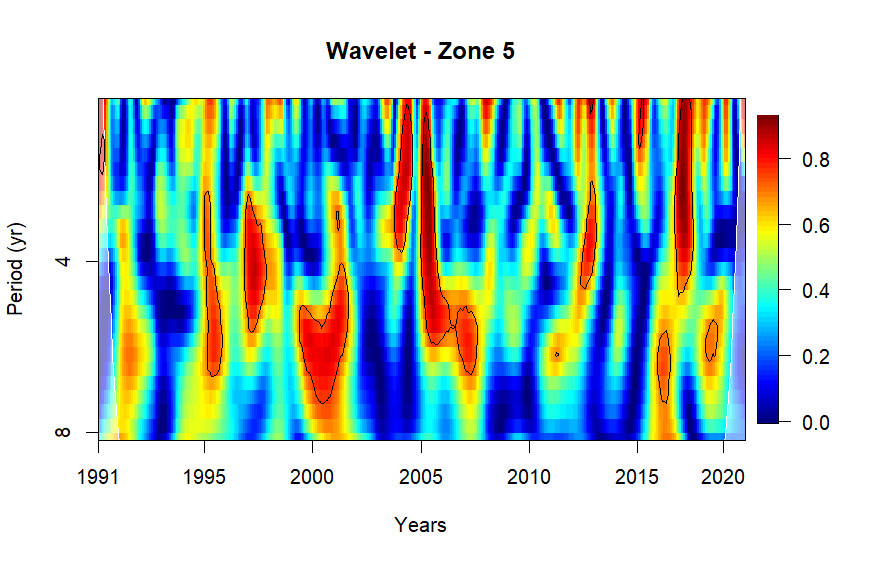

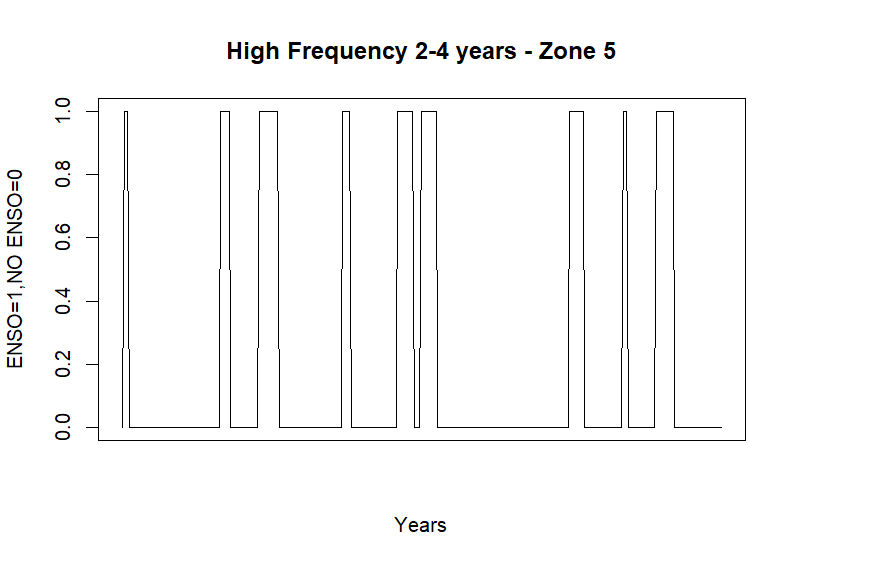

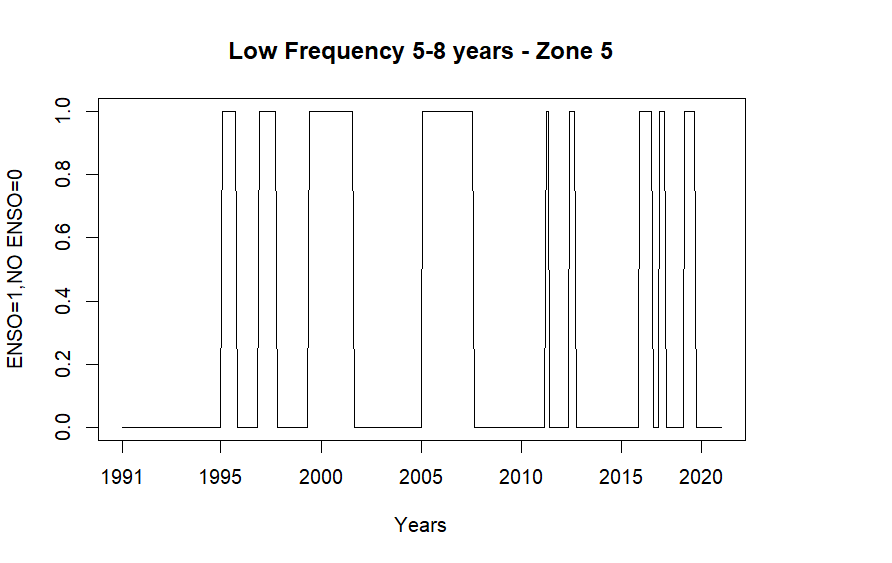


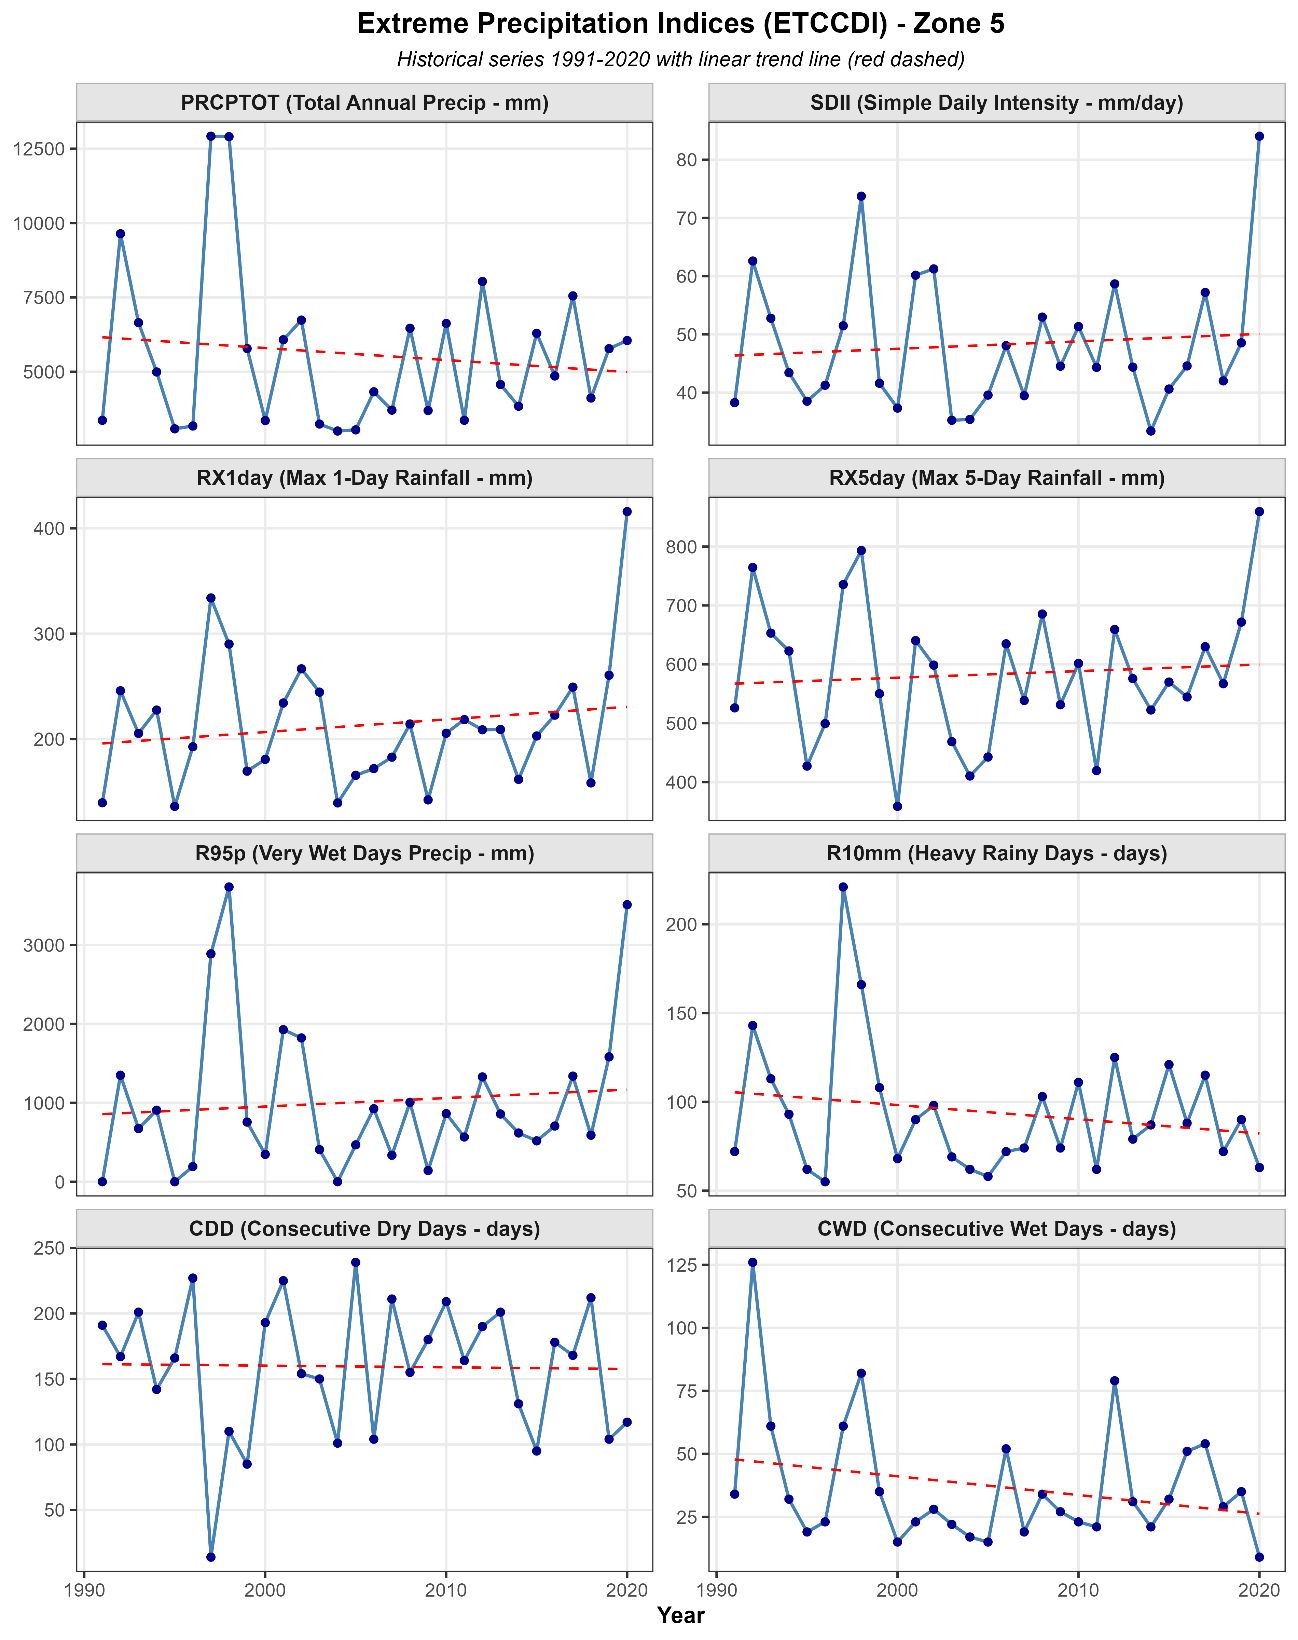


Zone 6


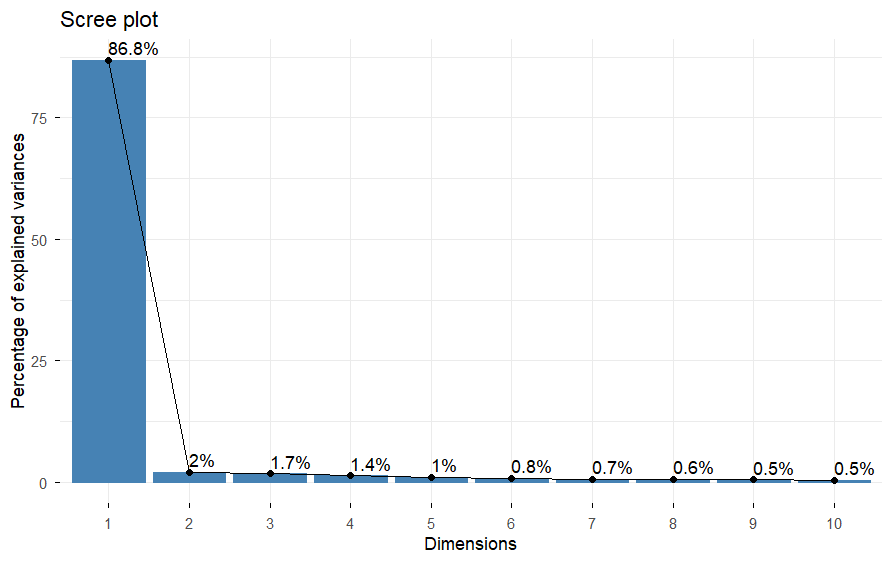

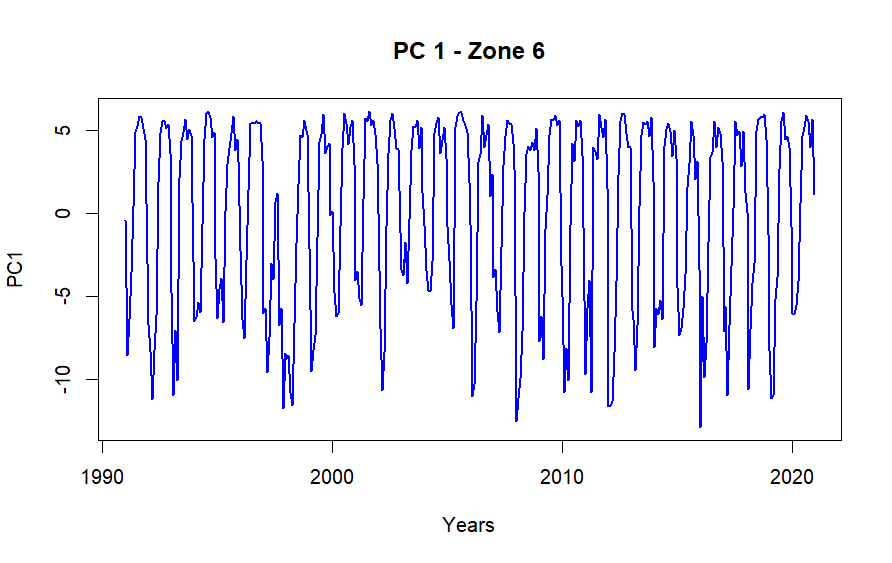

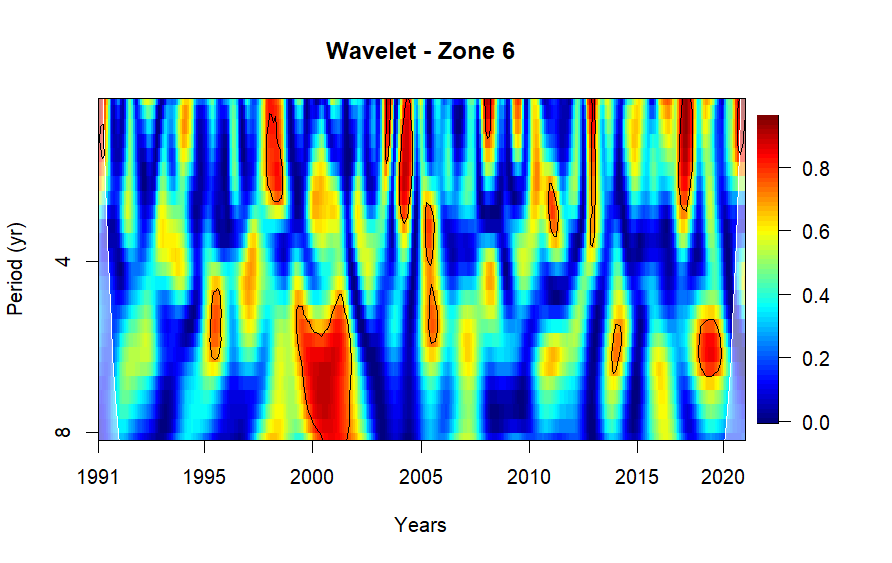

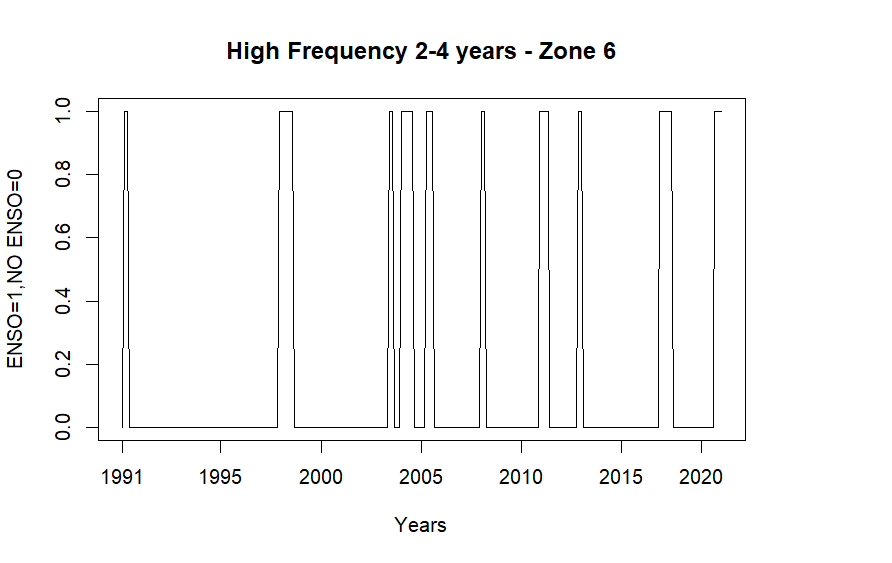

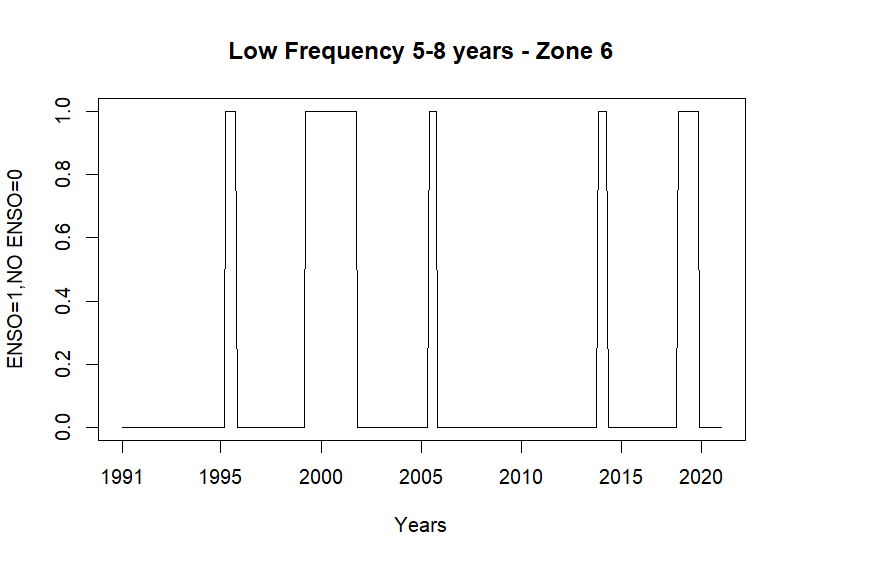


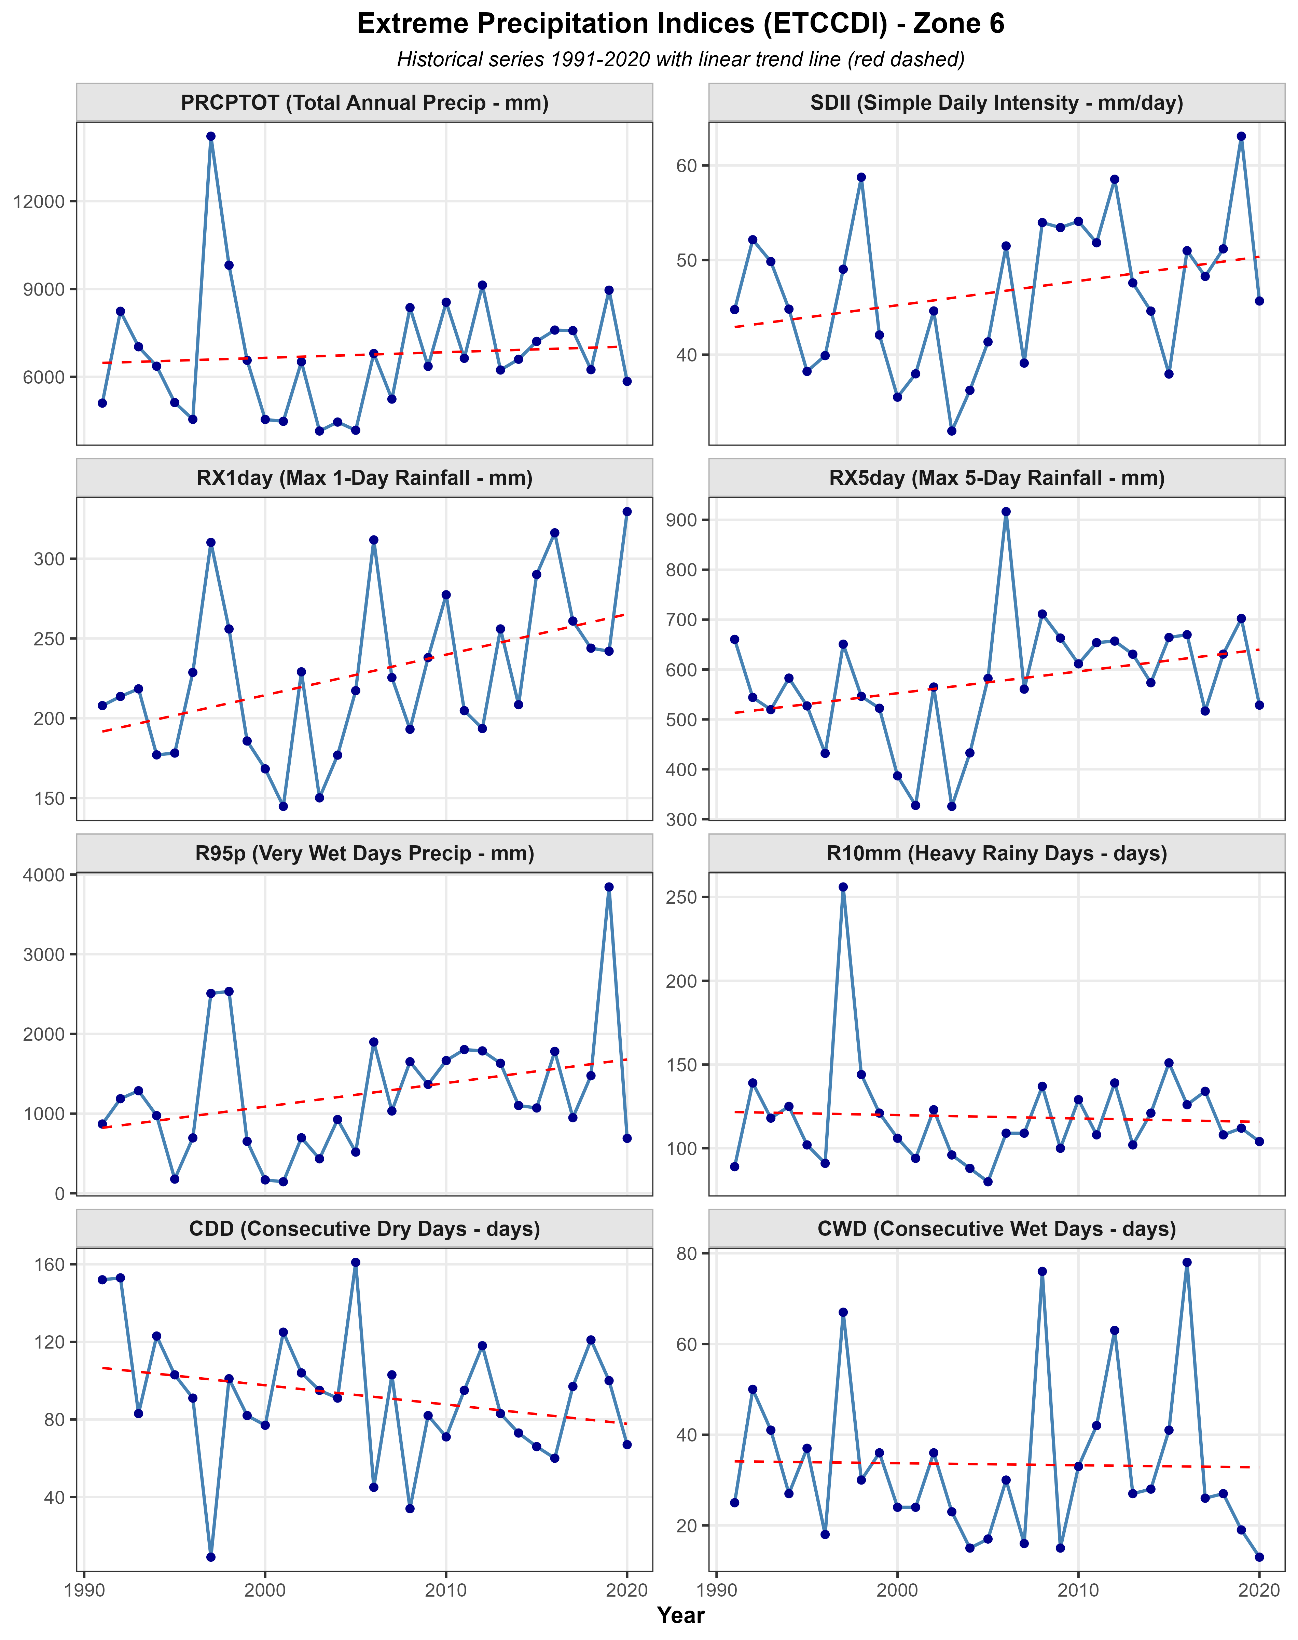


Zone 7


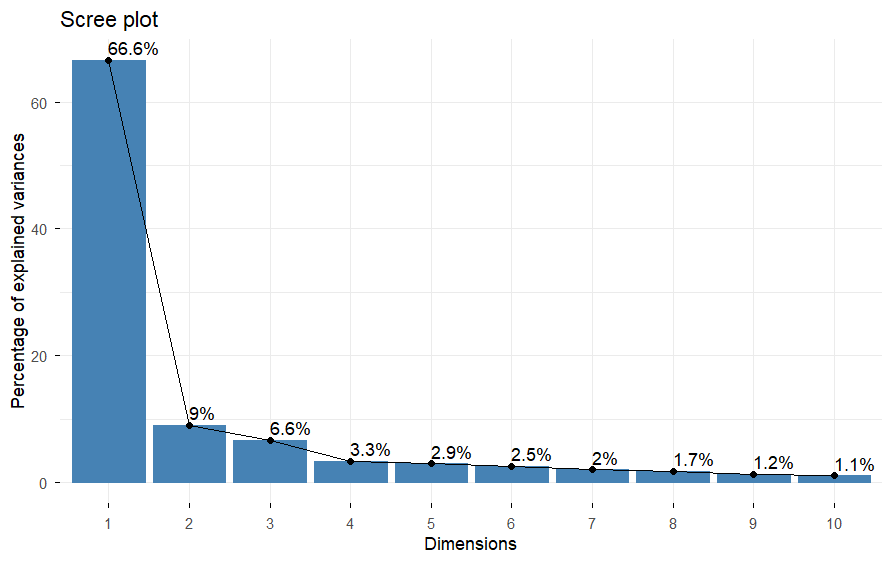

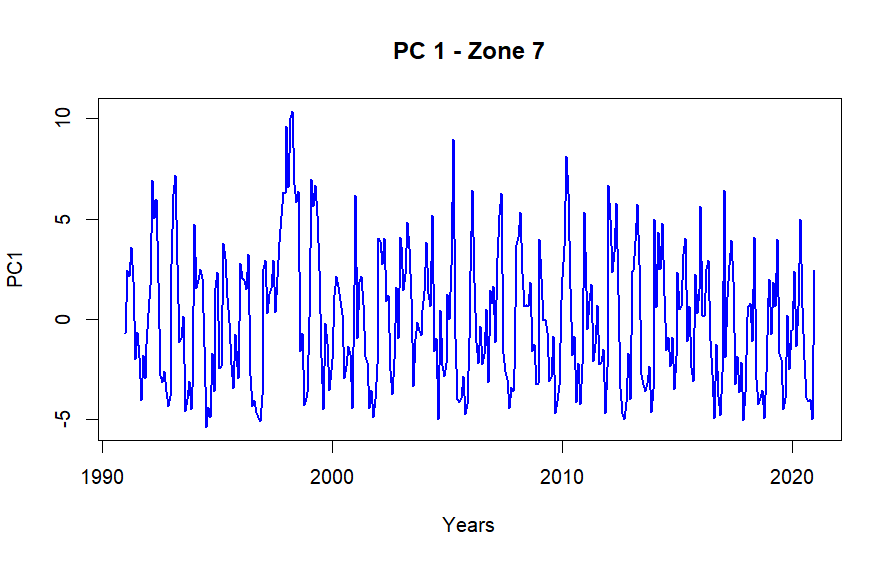

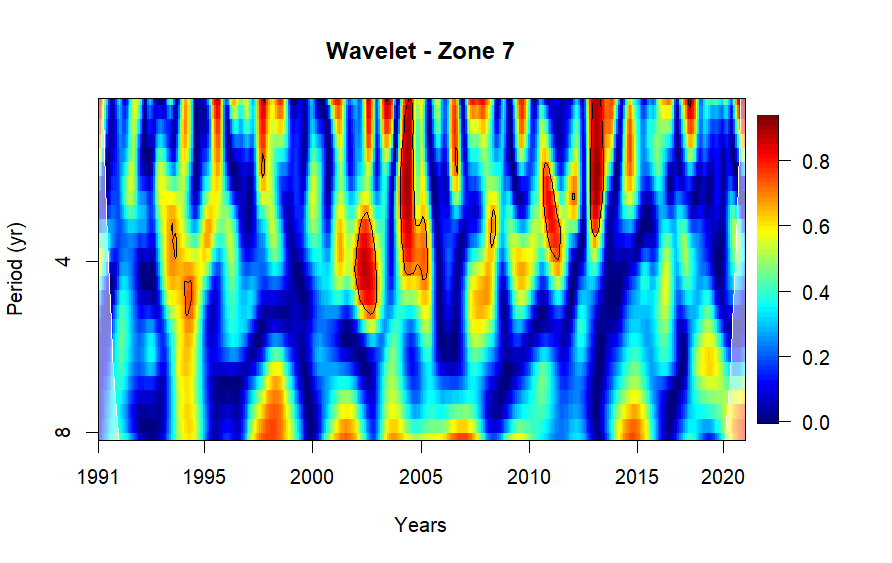

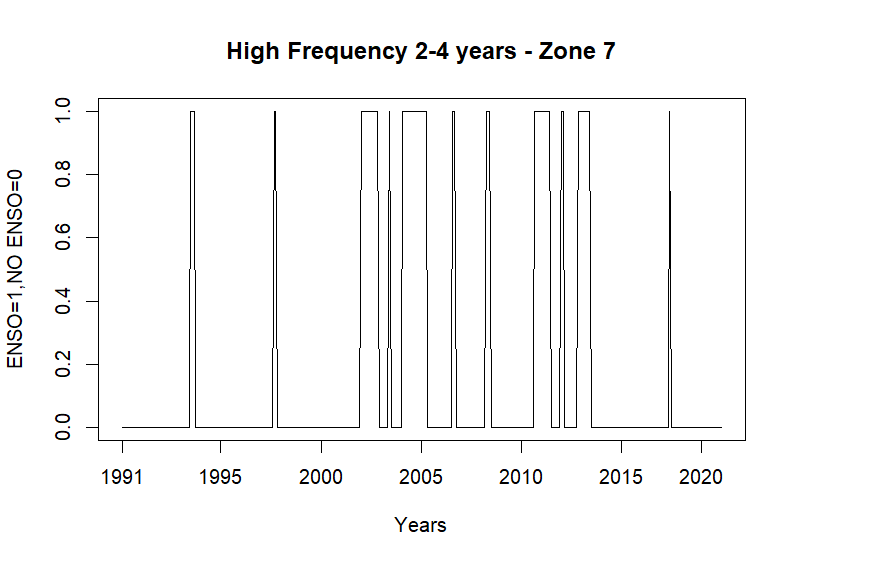

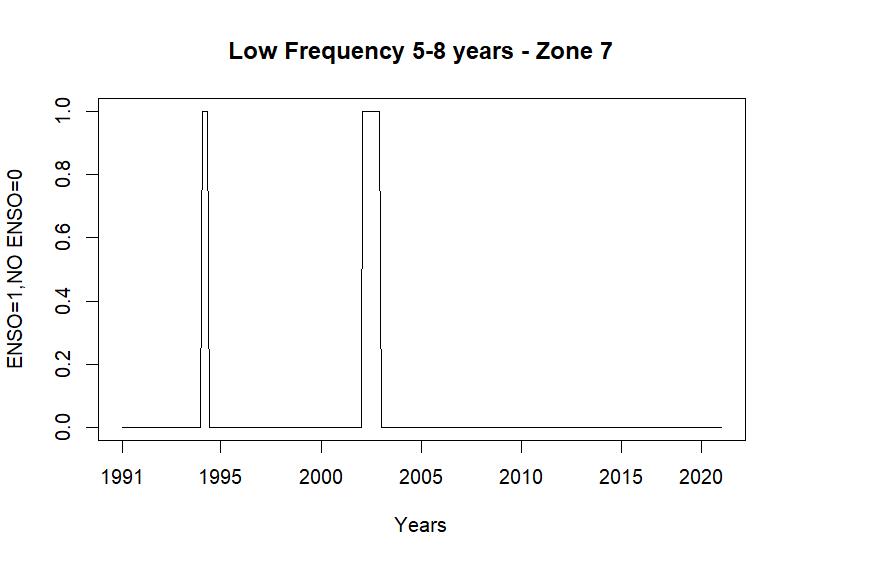


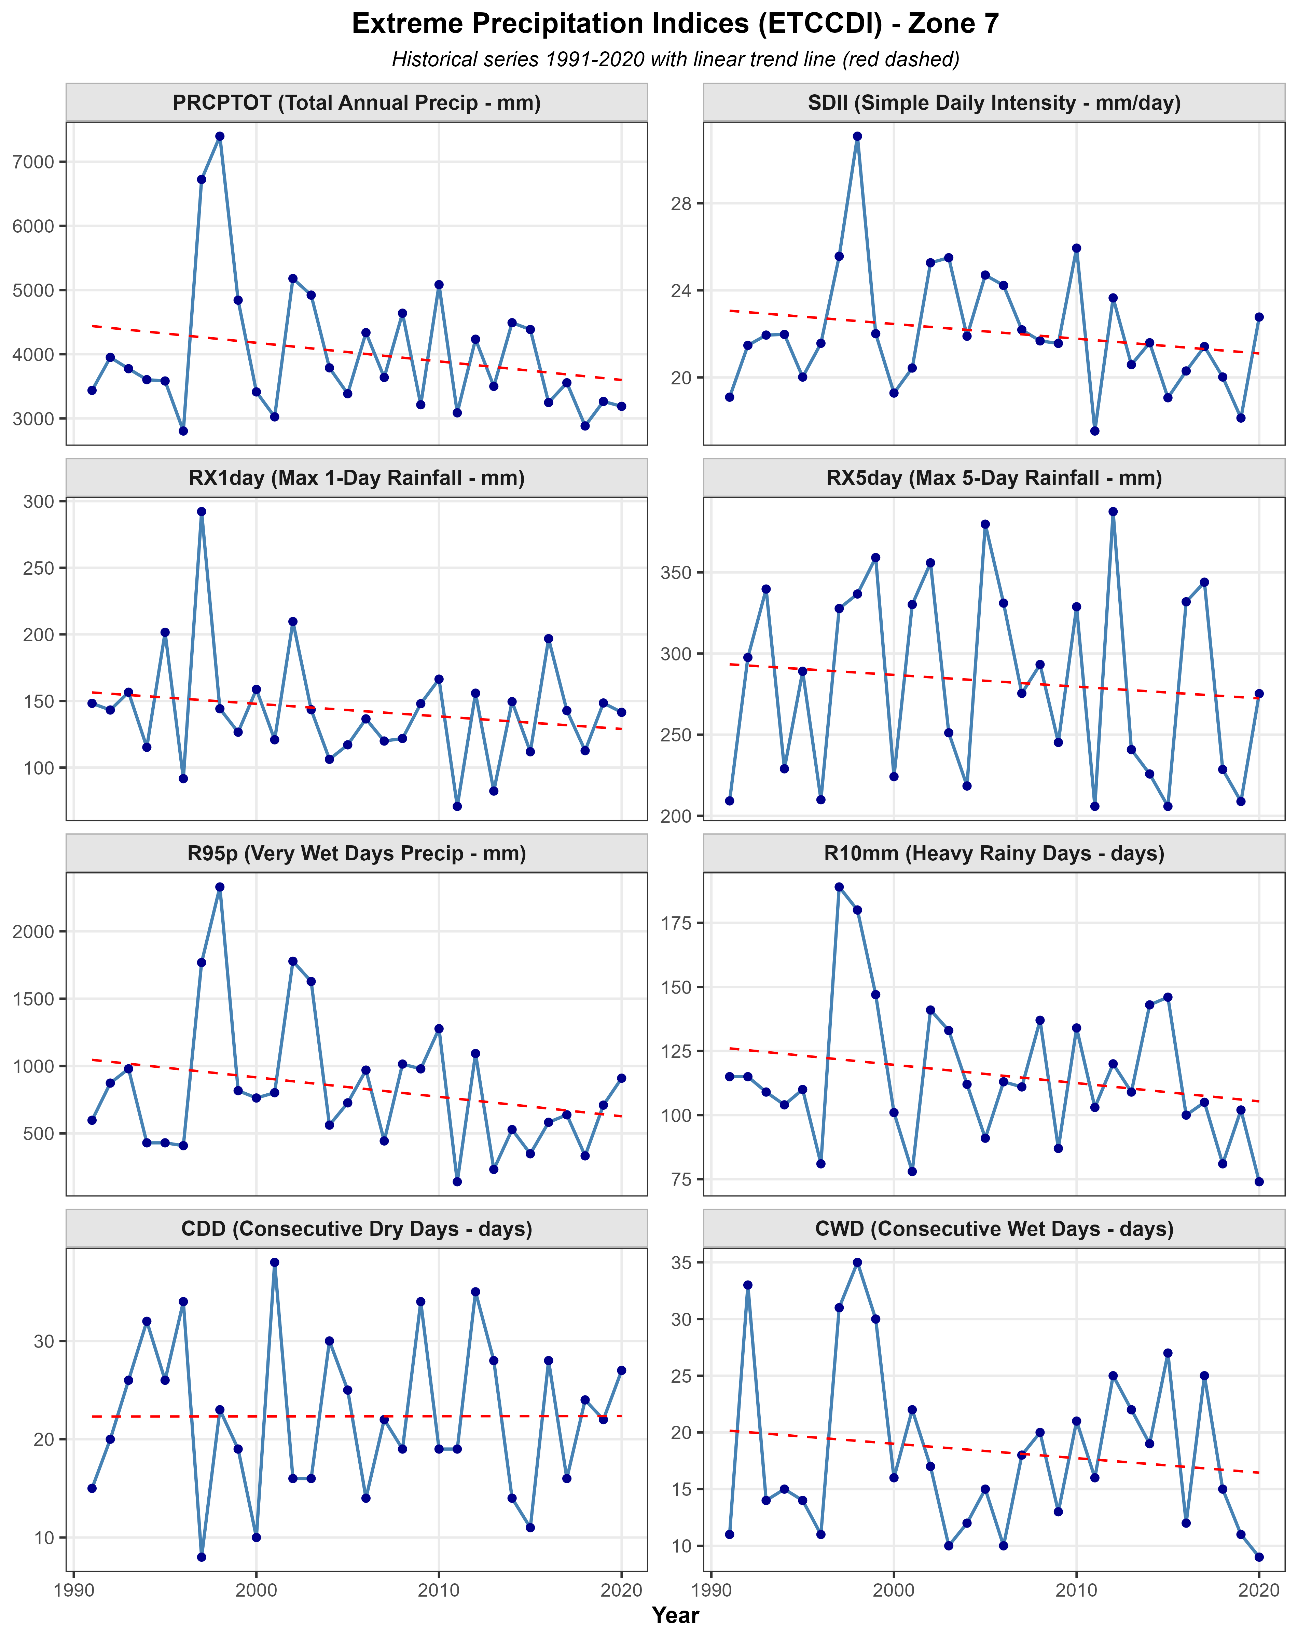


Zone 8


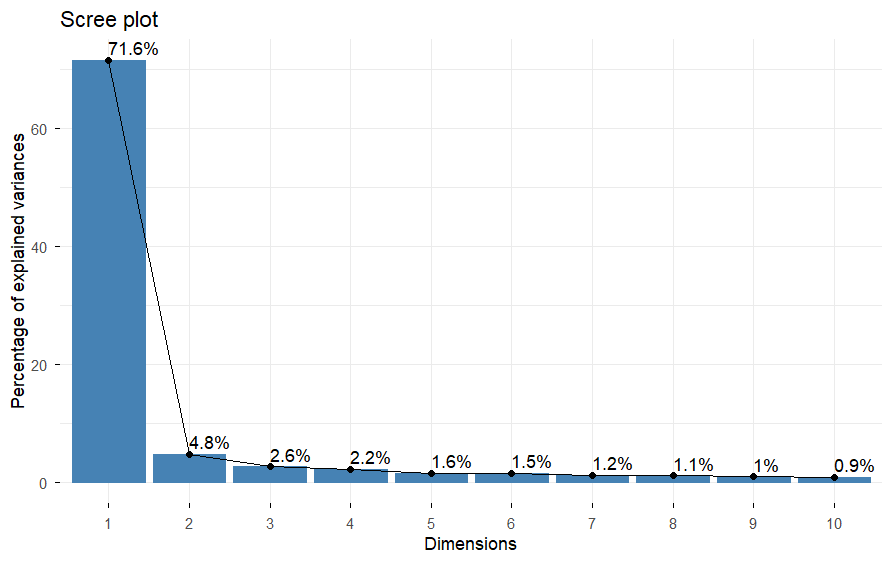

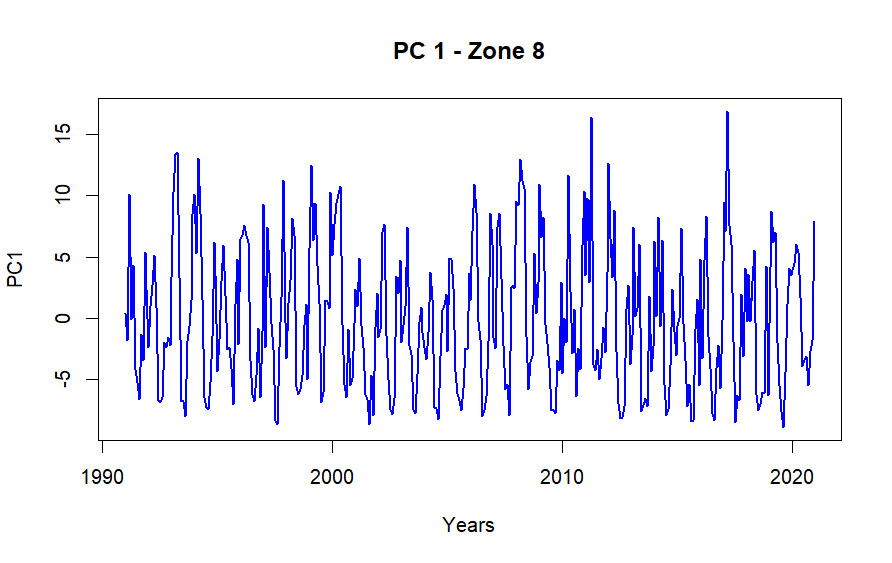

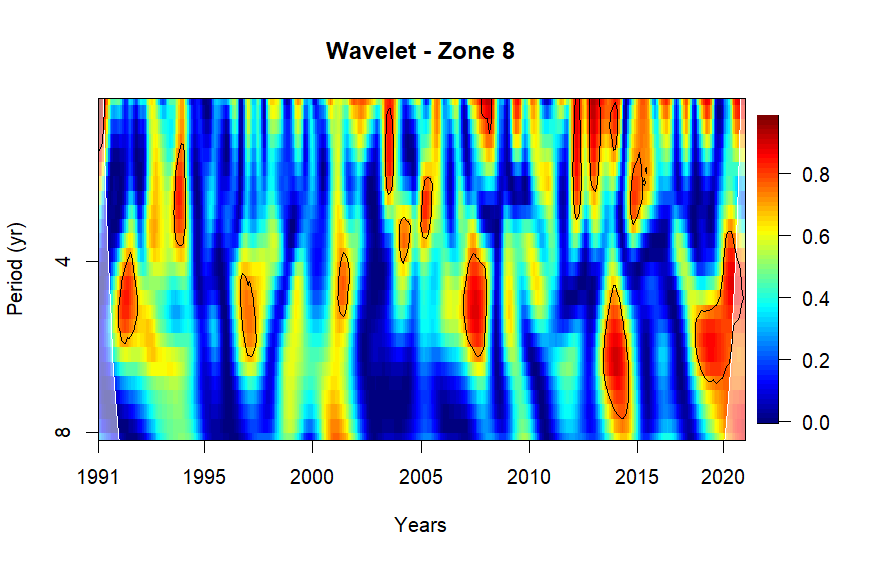

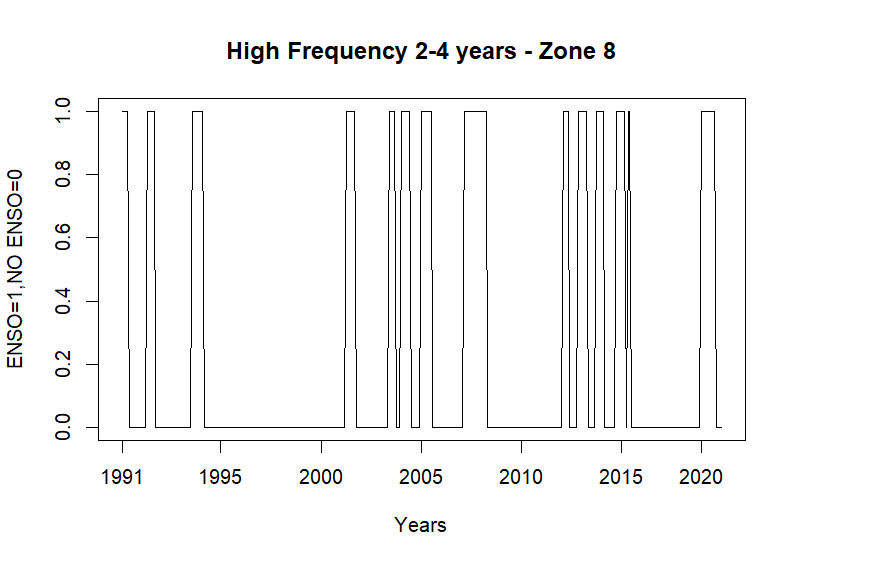

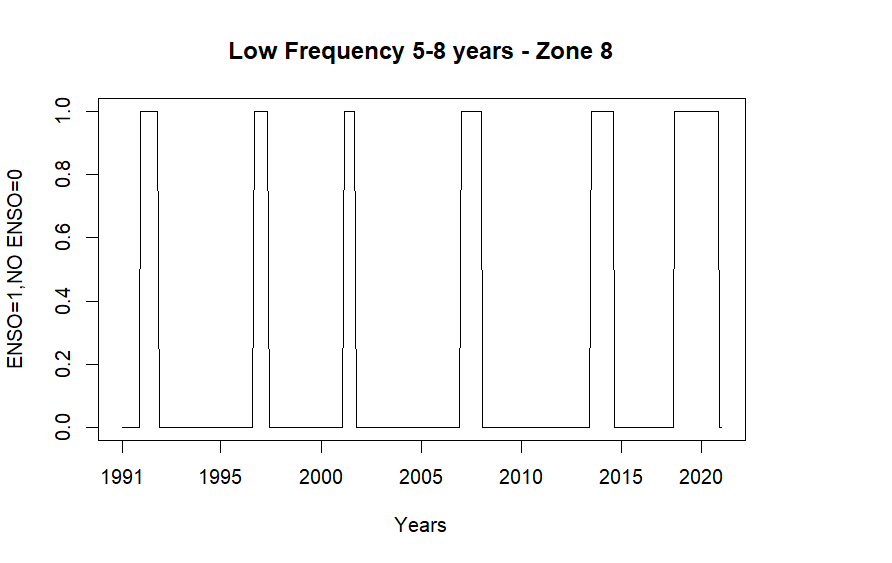


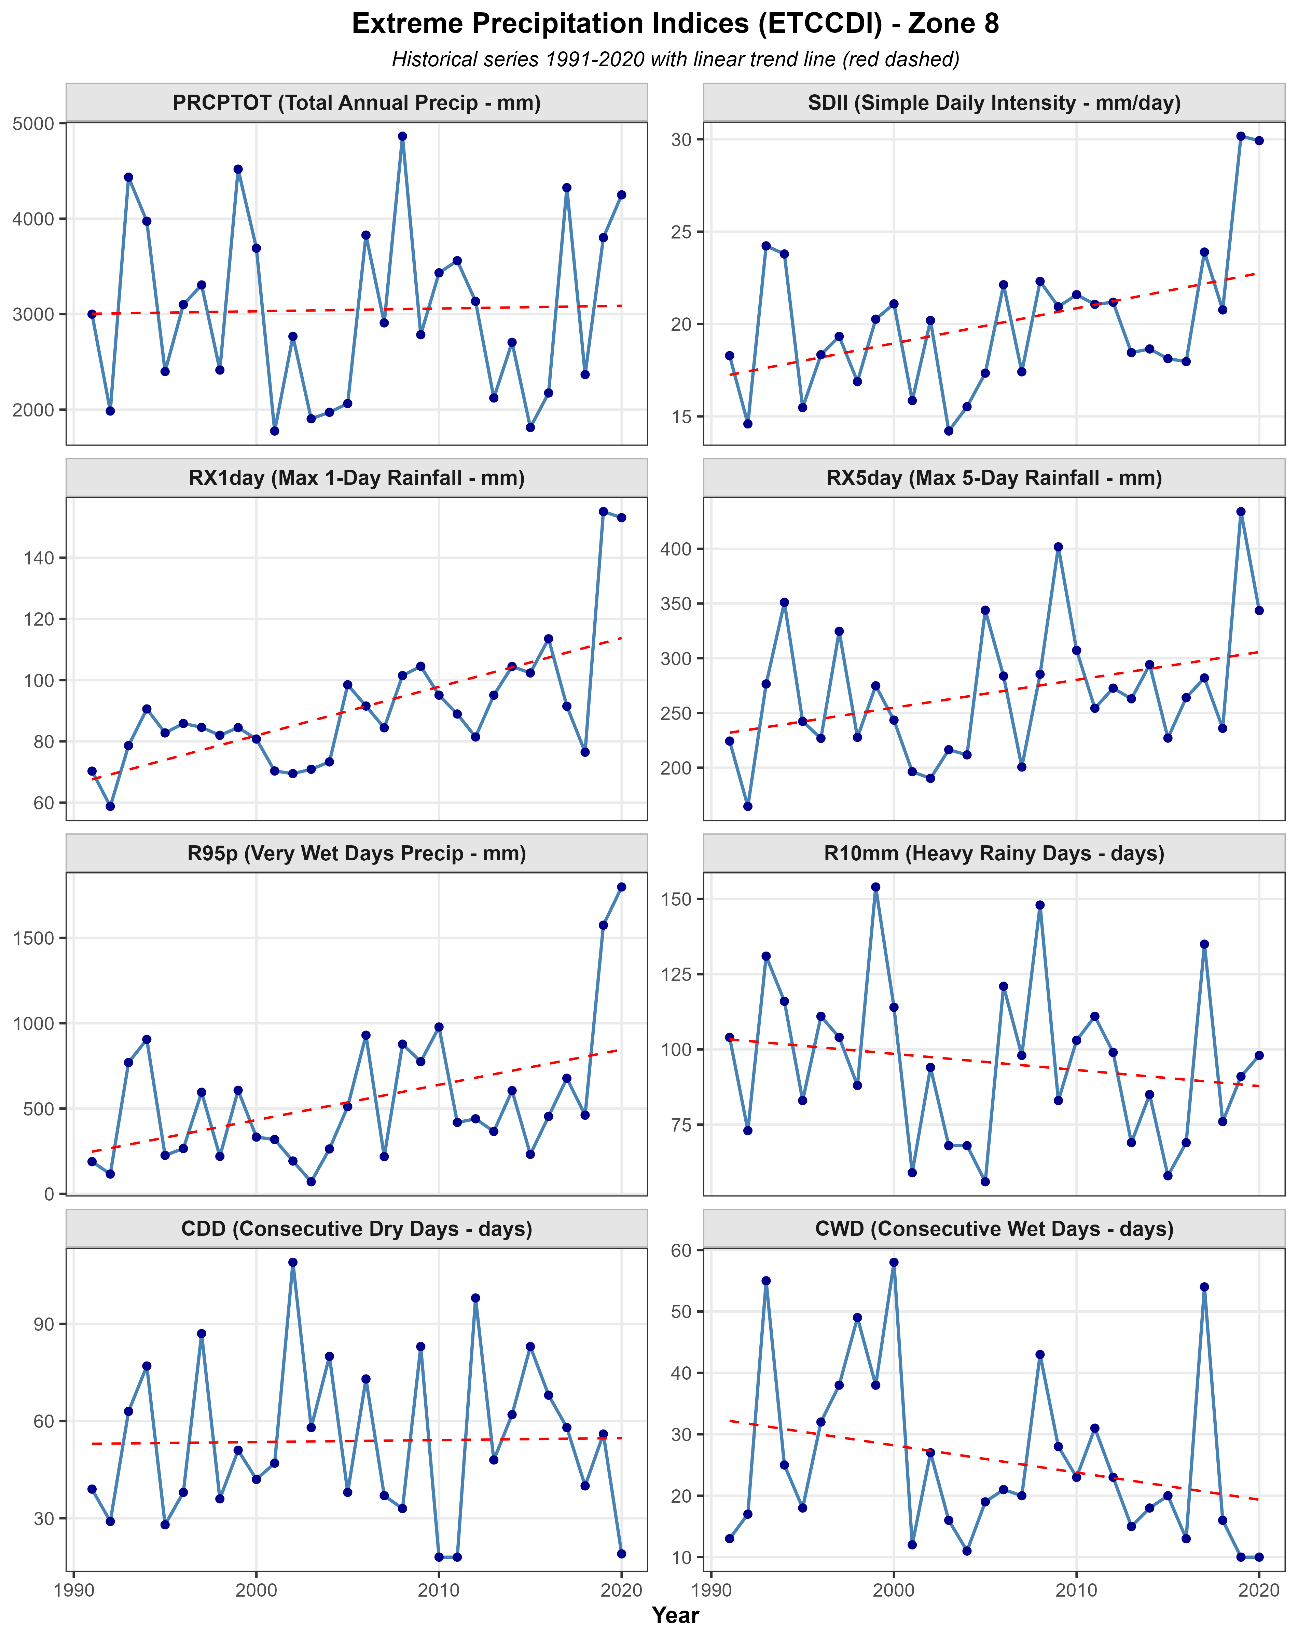


Zone 9


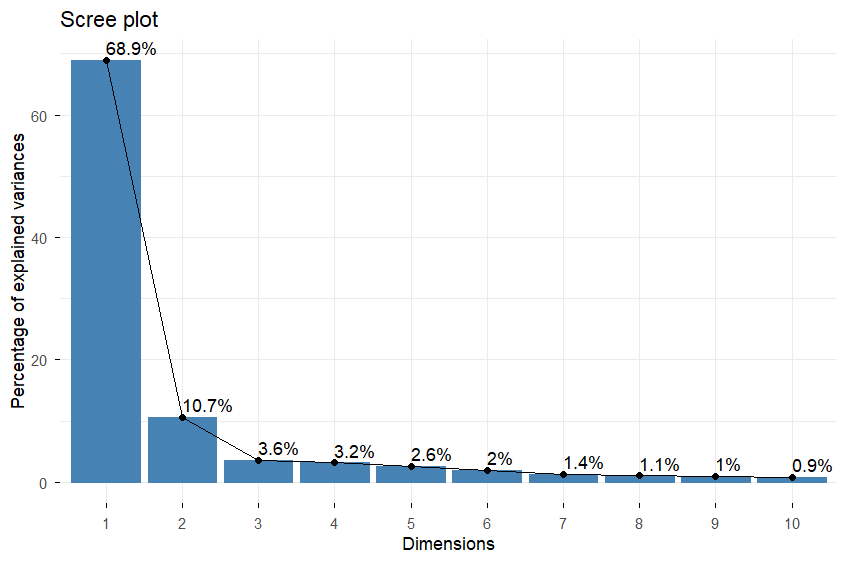

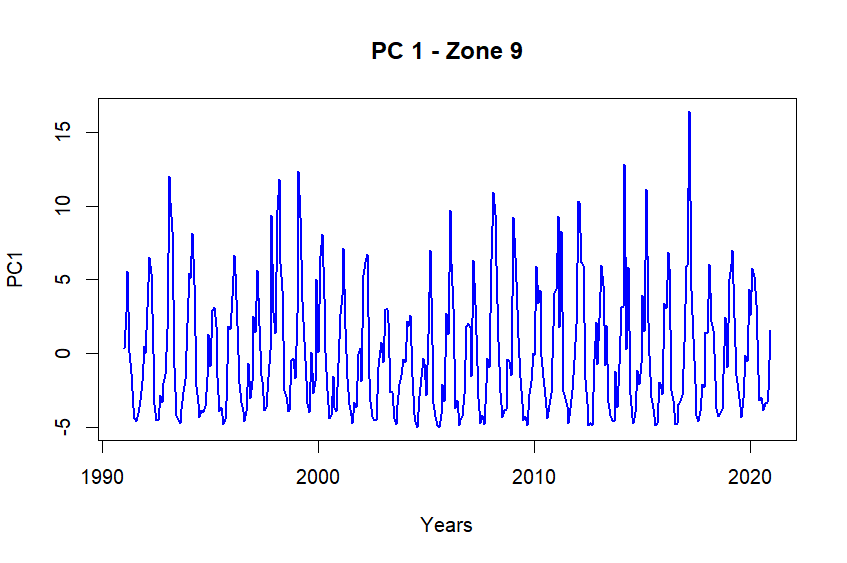

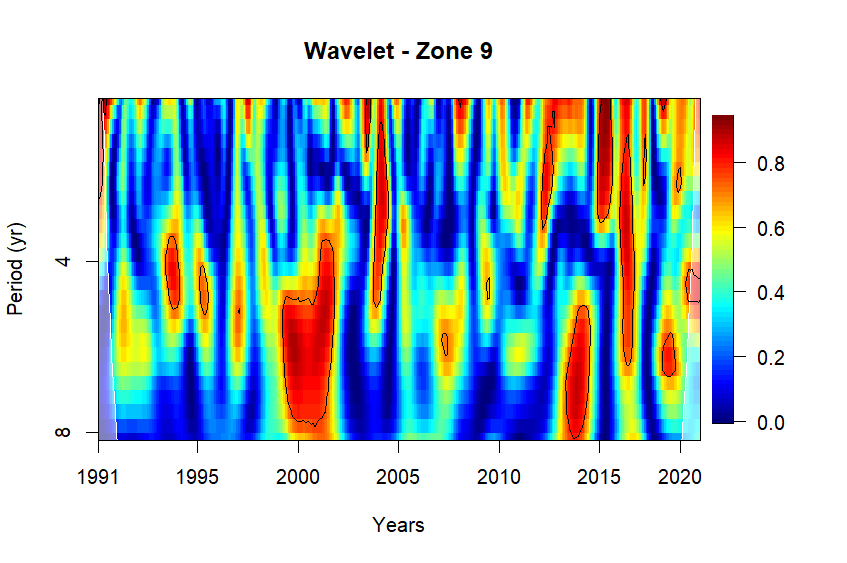

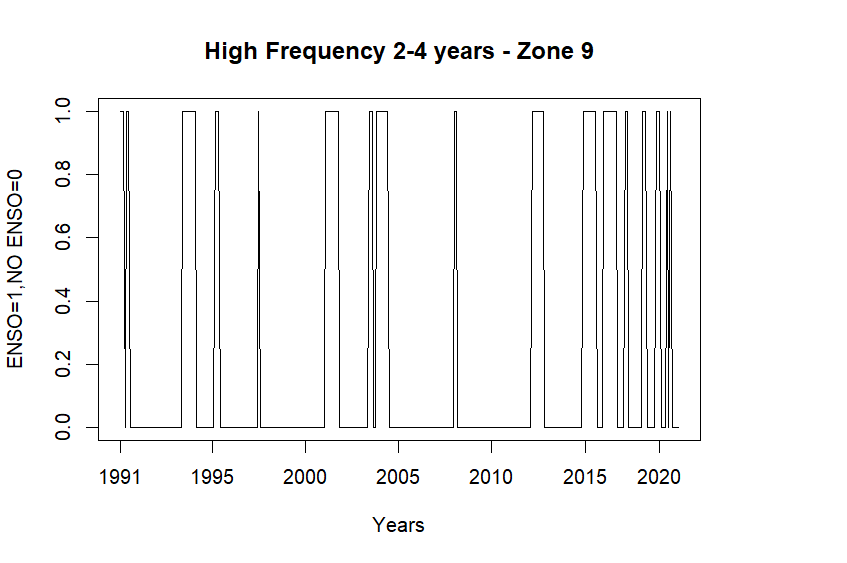

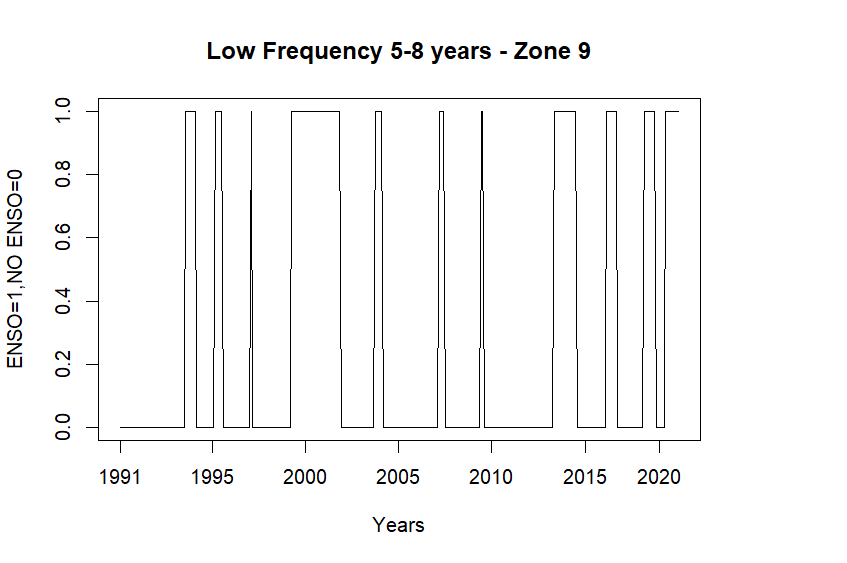


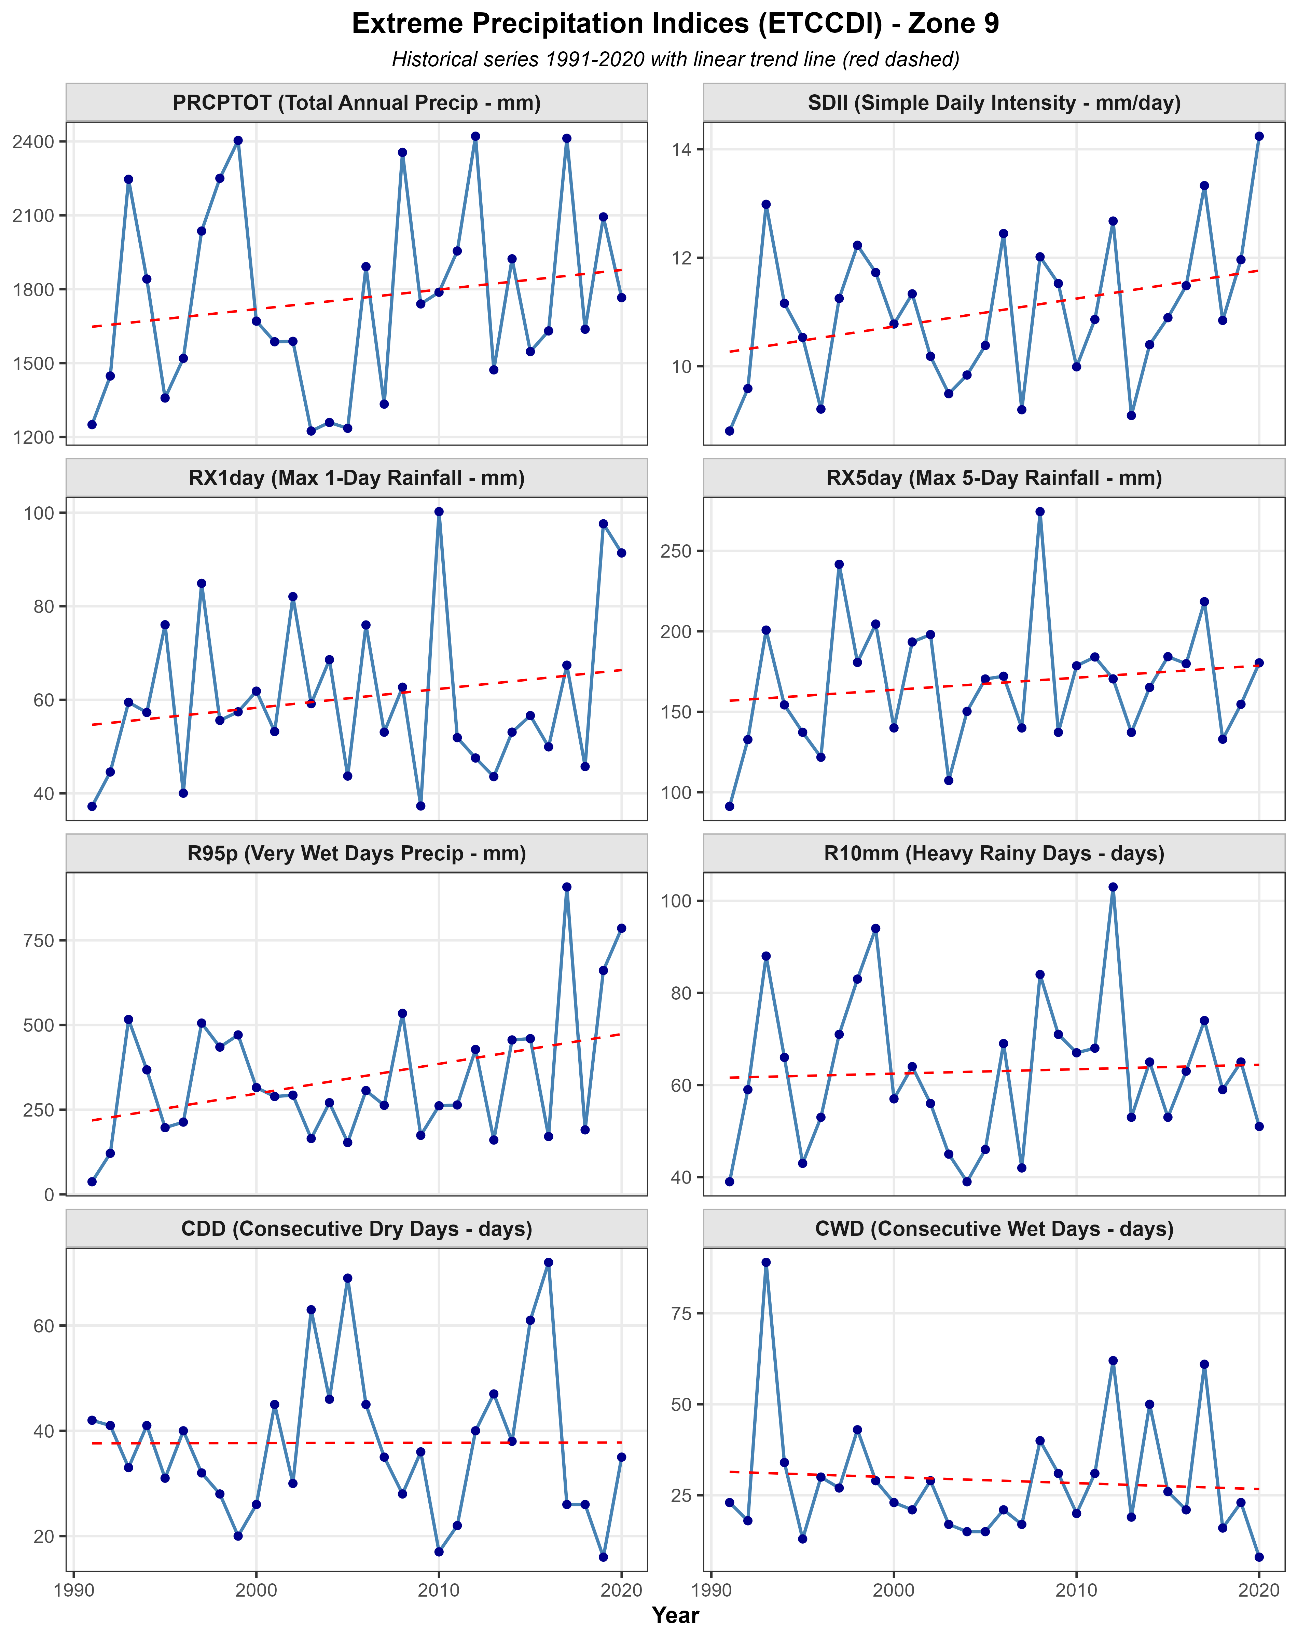


Zone 10


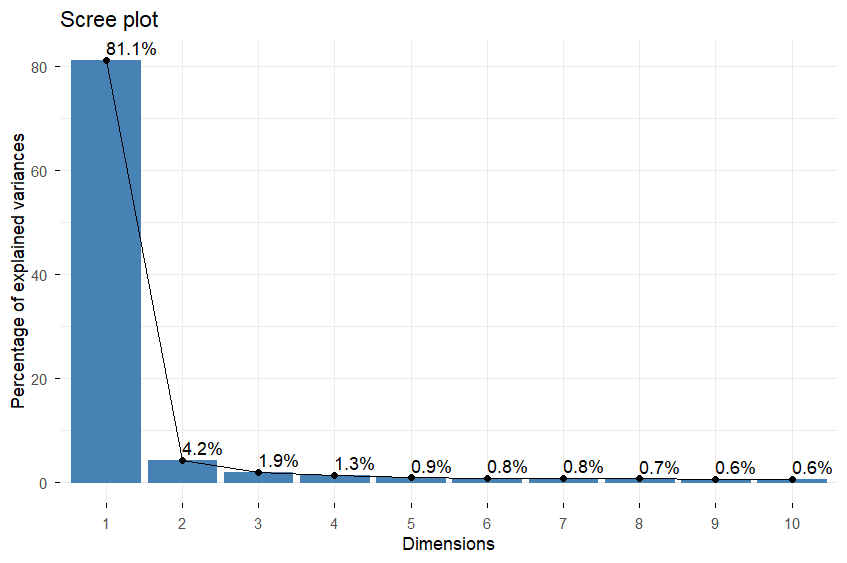

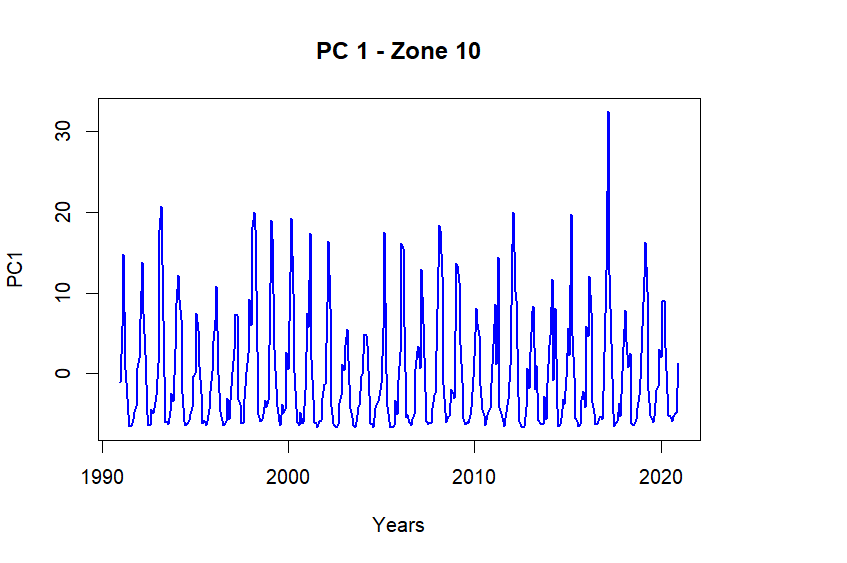

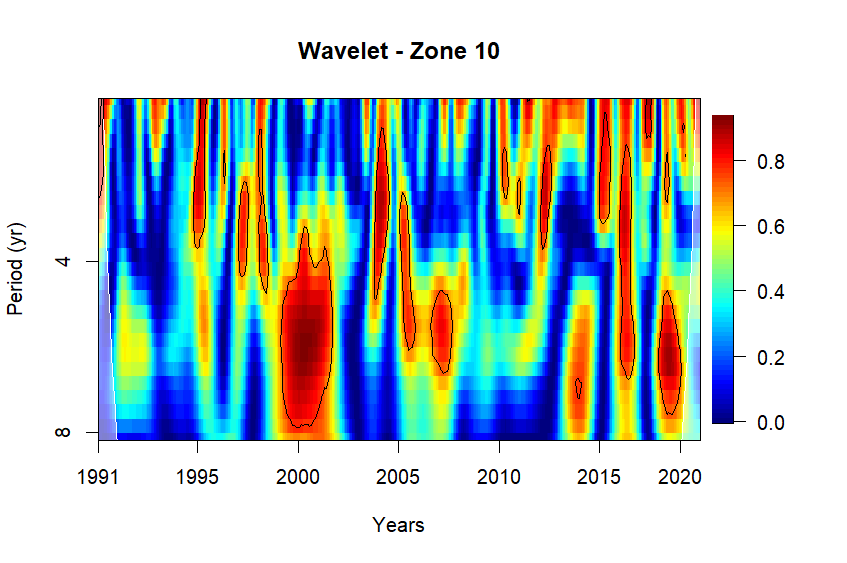

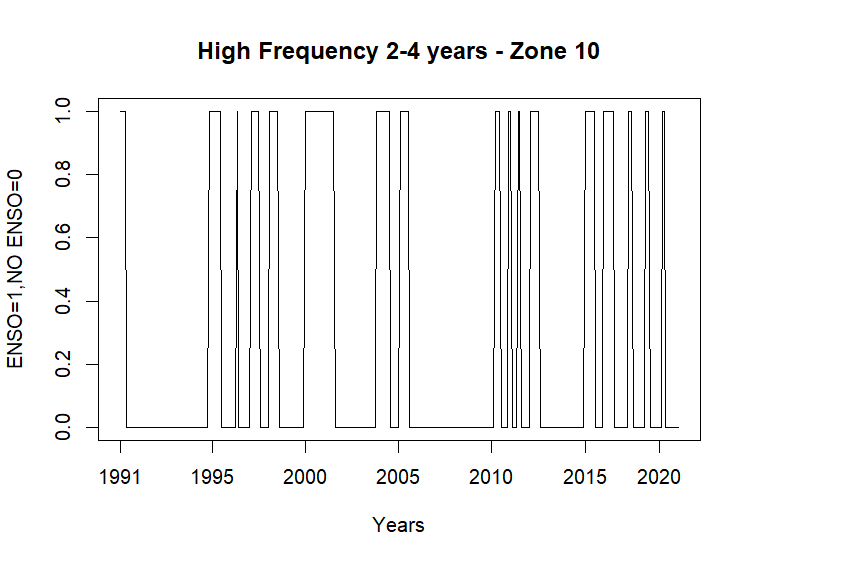

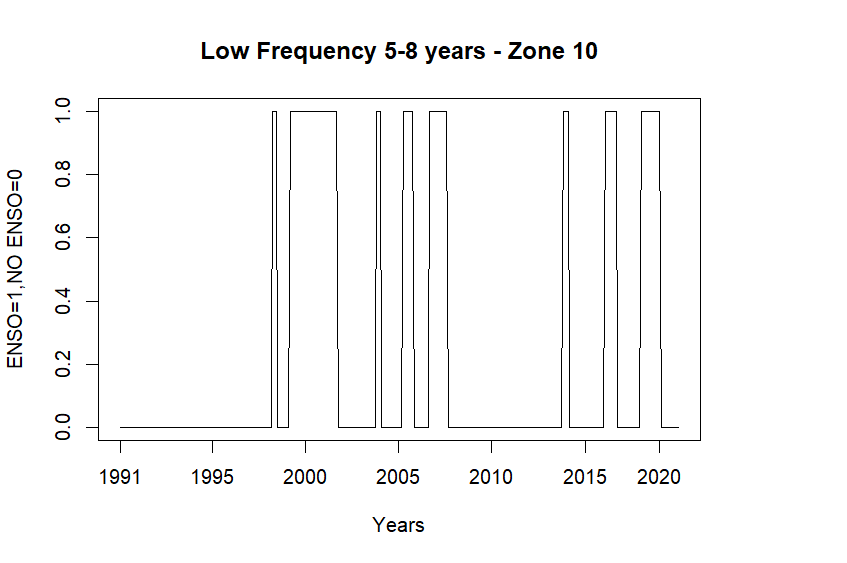


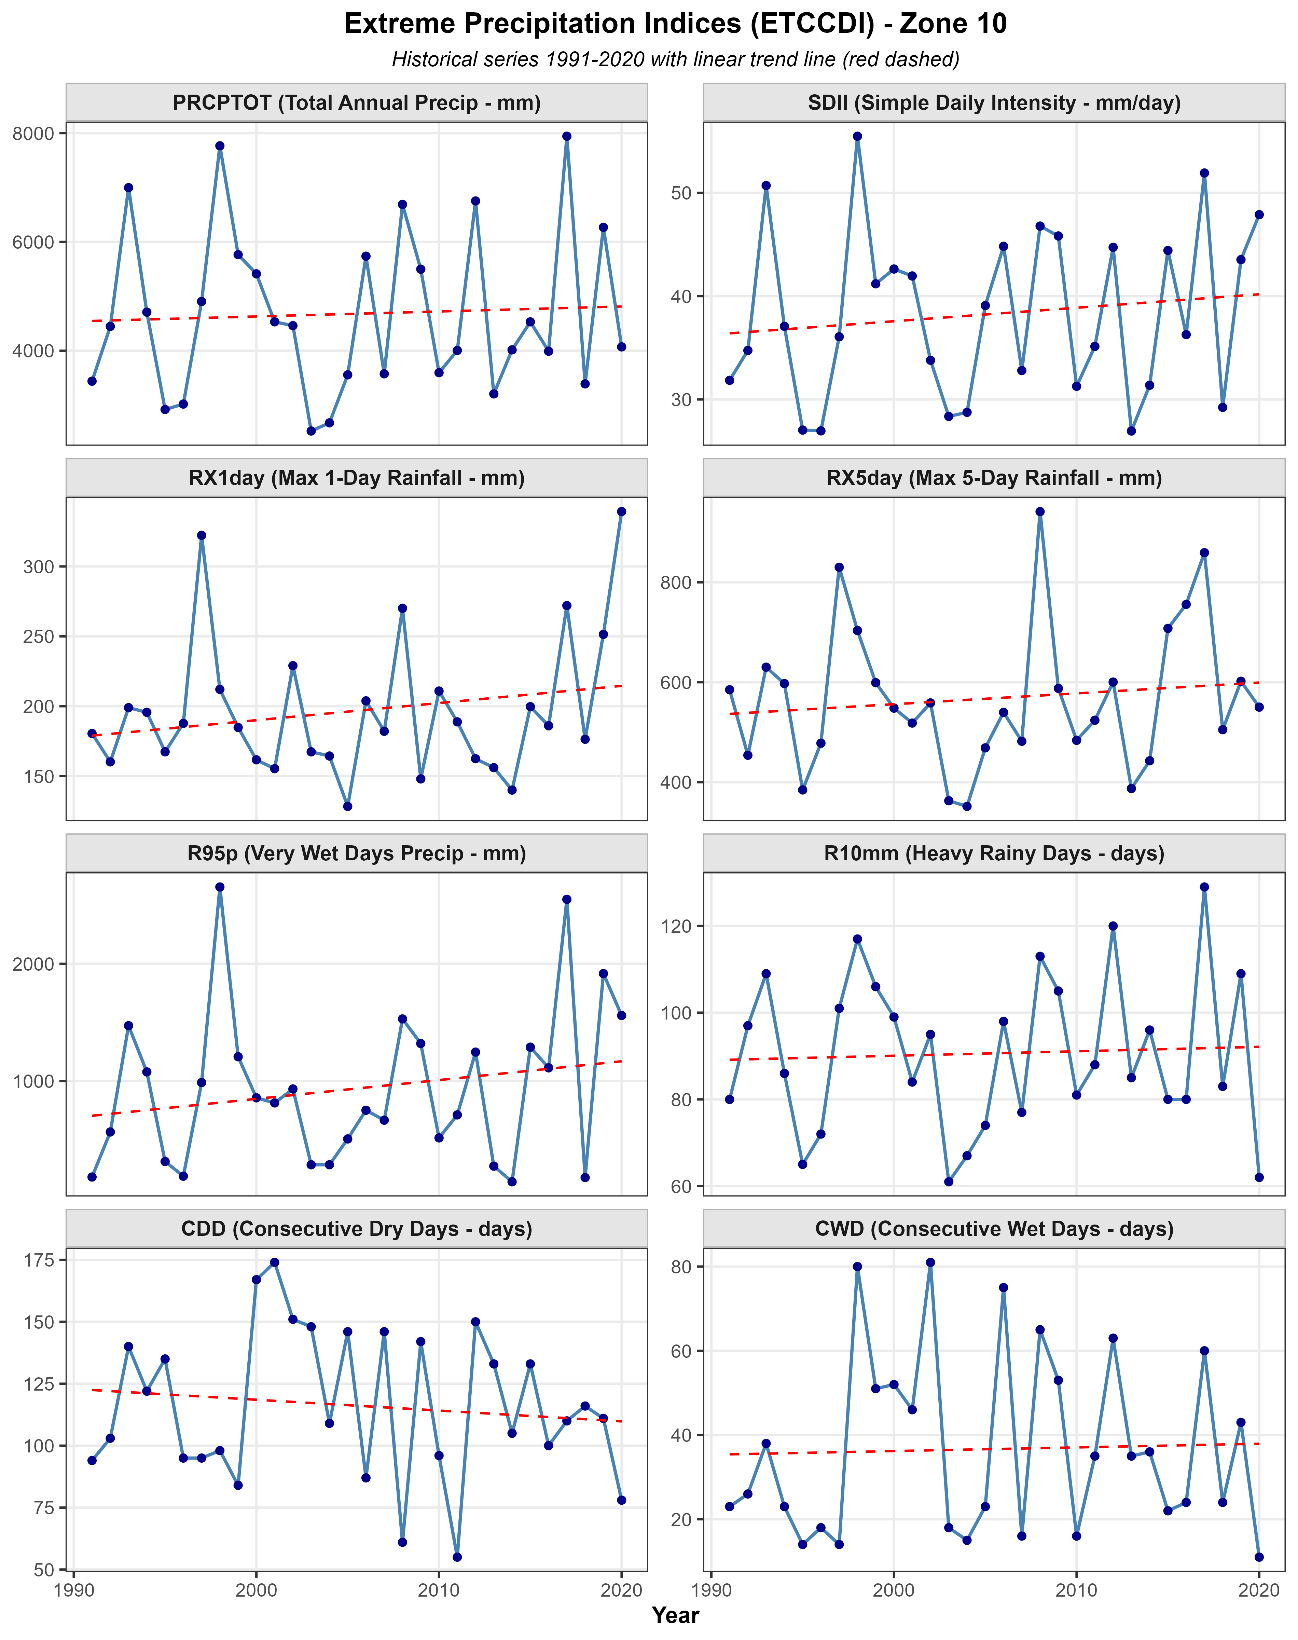


Zone 11


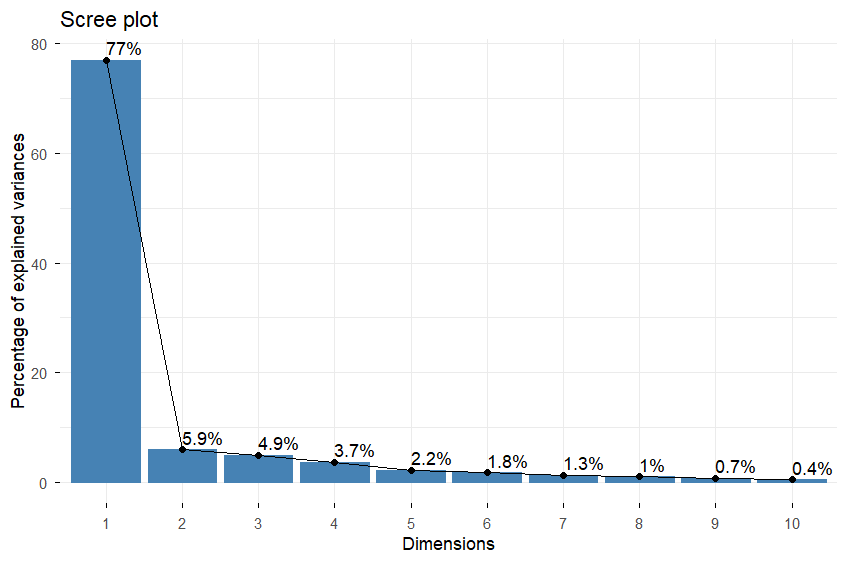

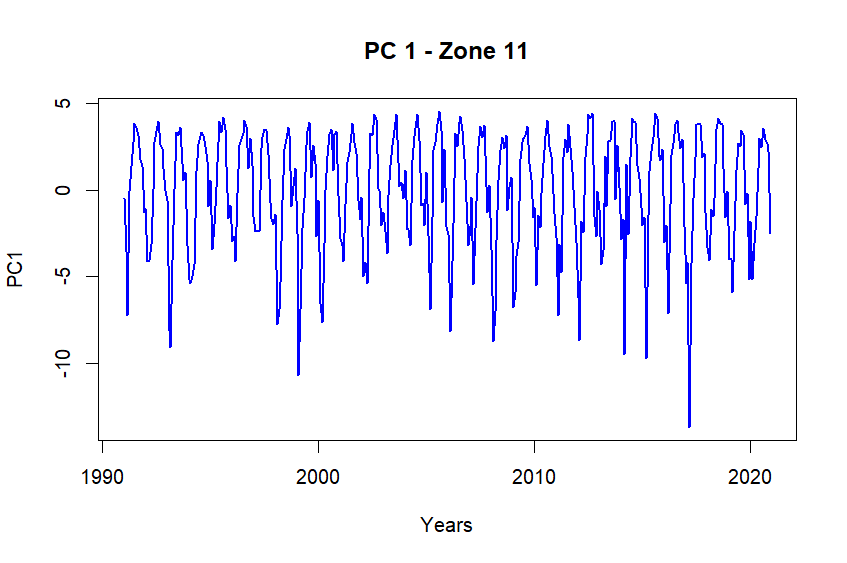

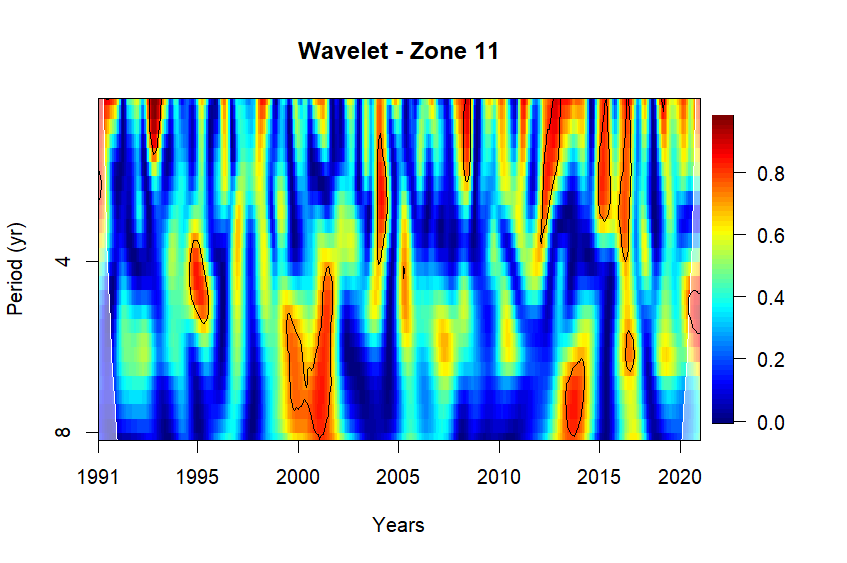

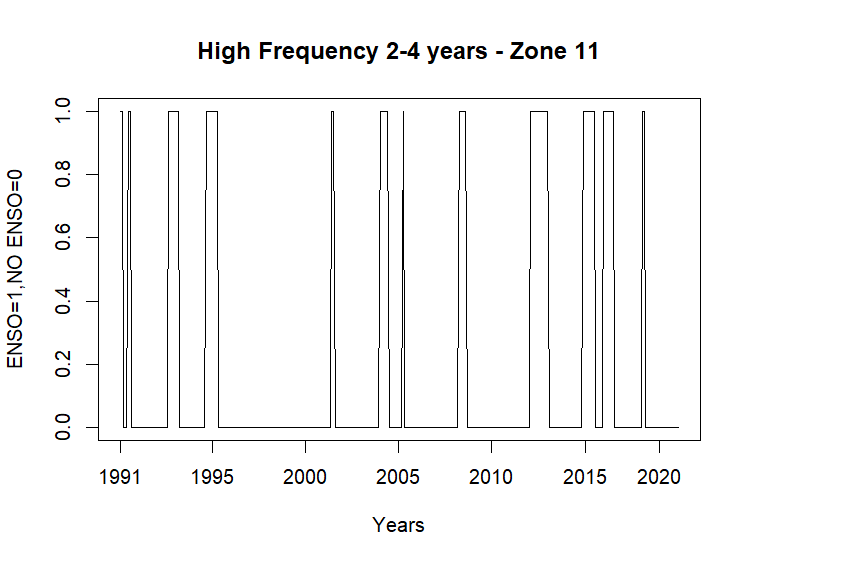

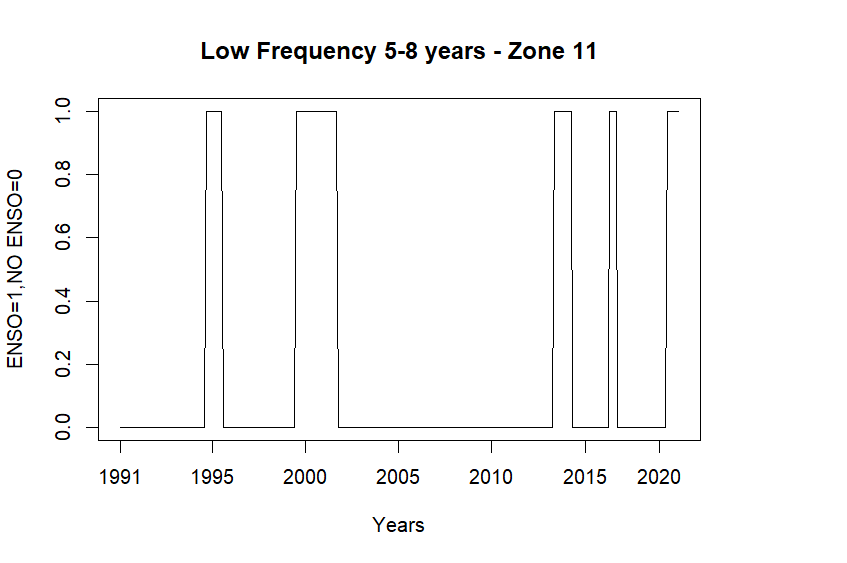


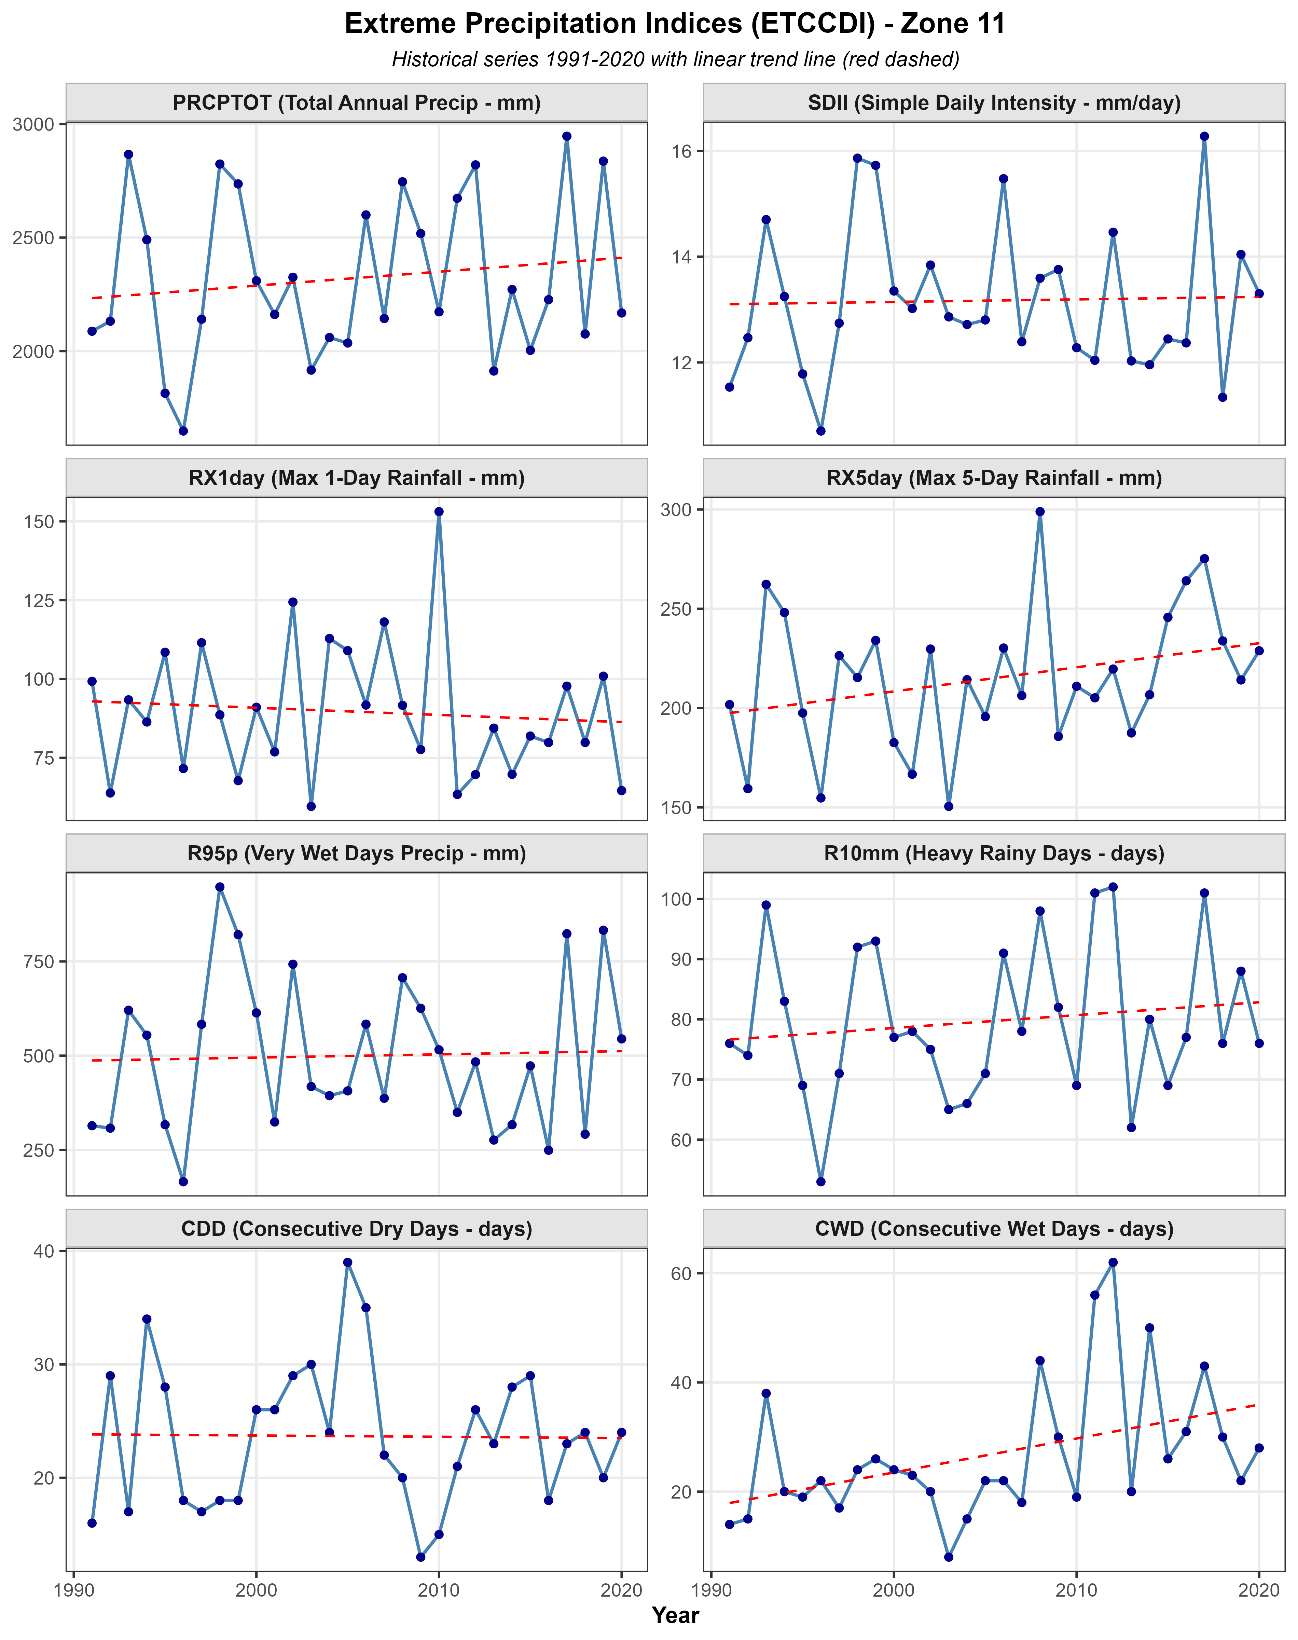


Zone 12


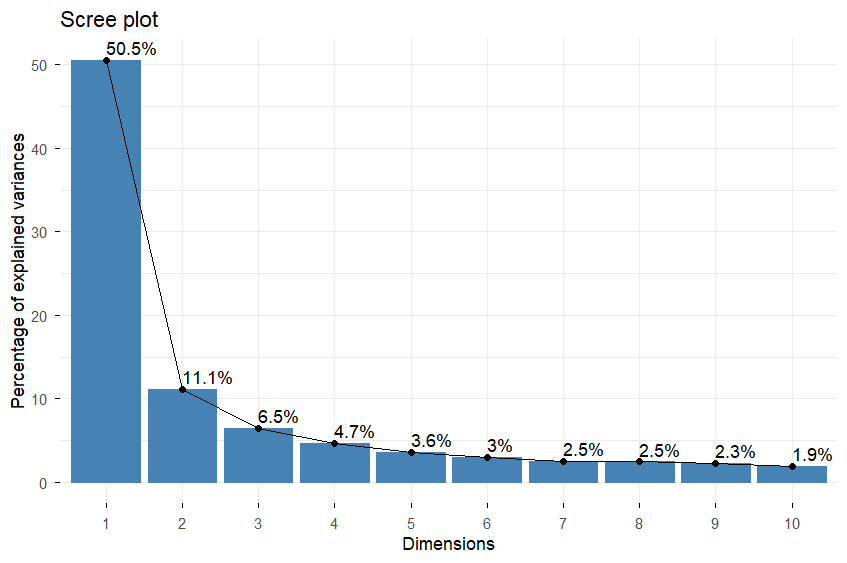

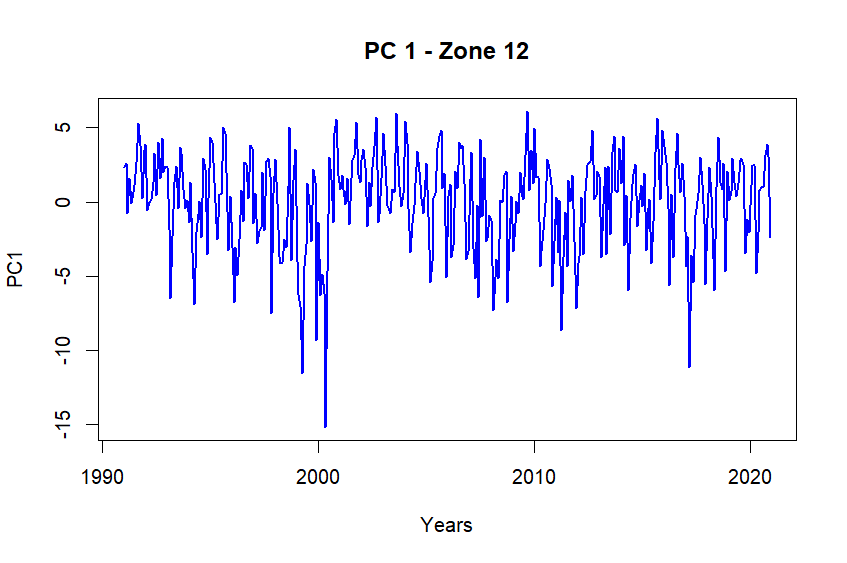

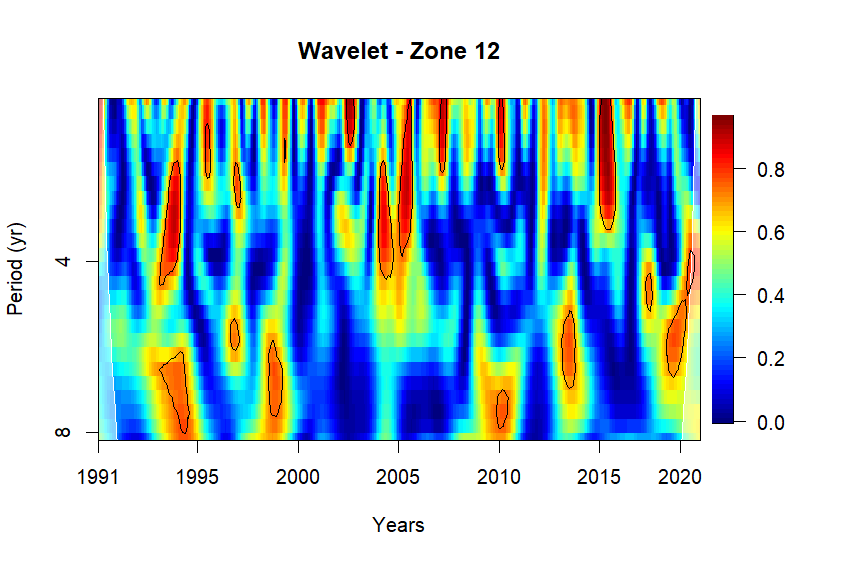


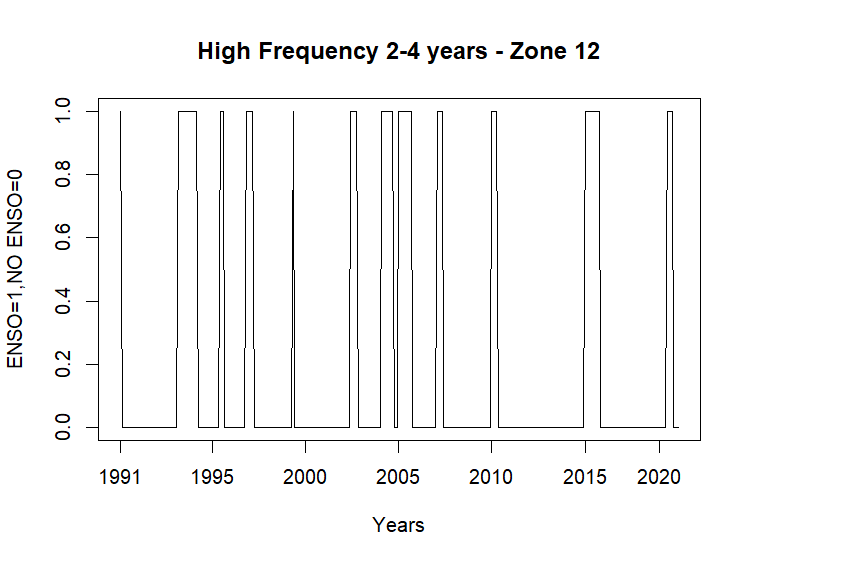

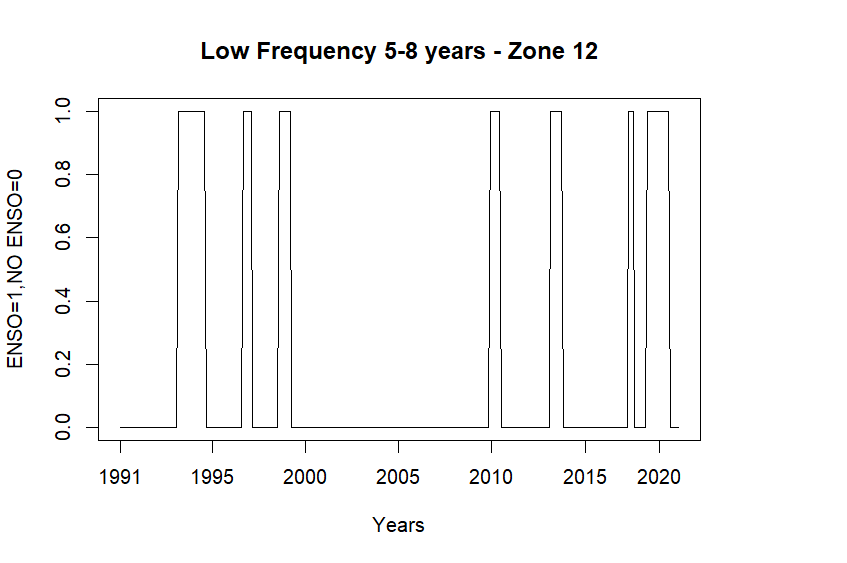


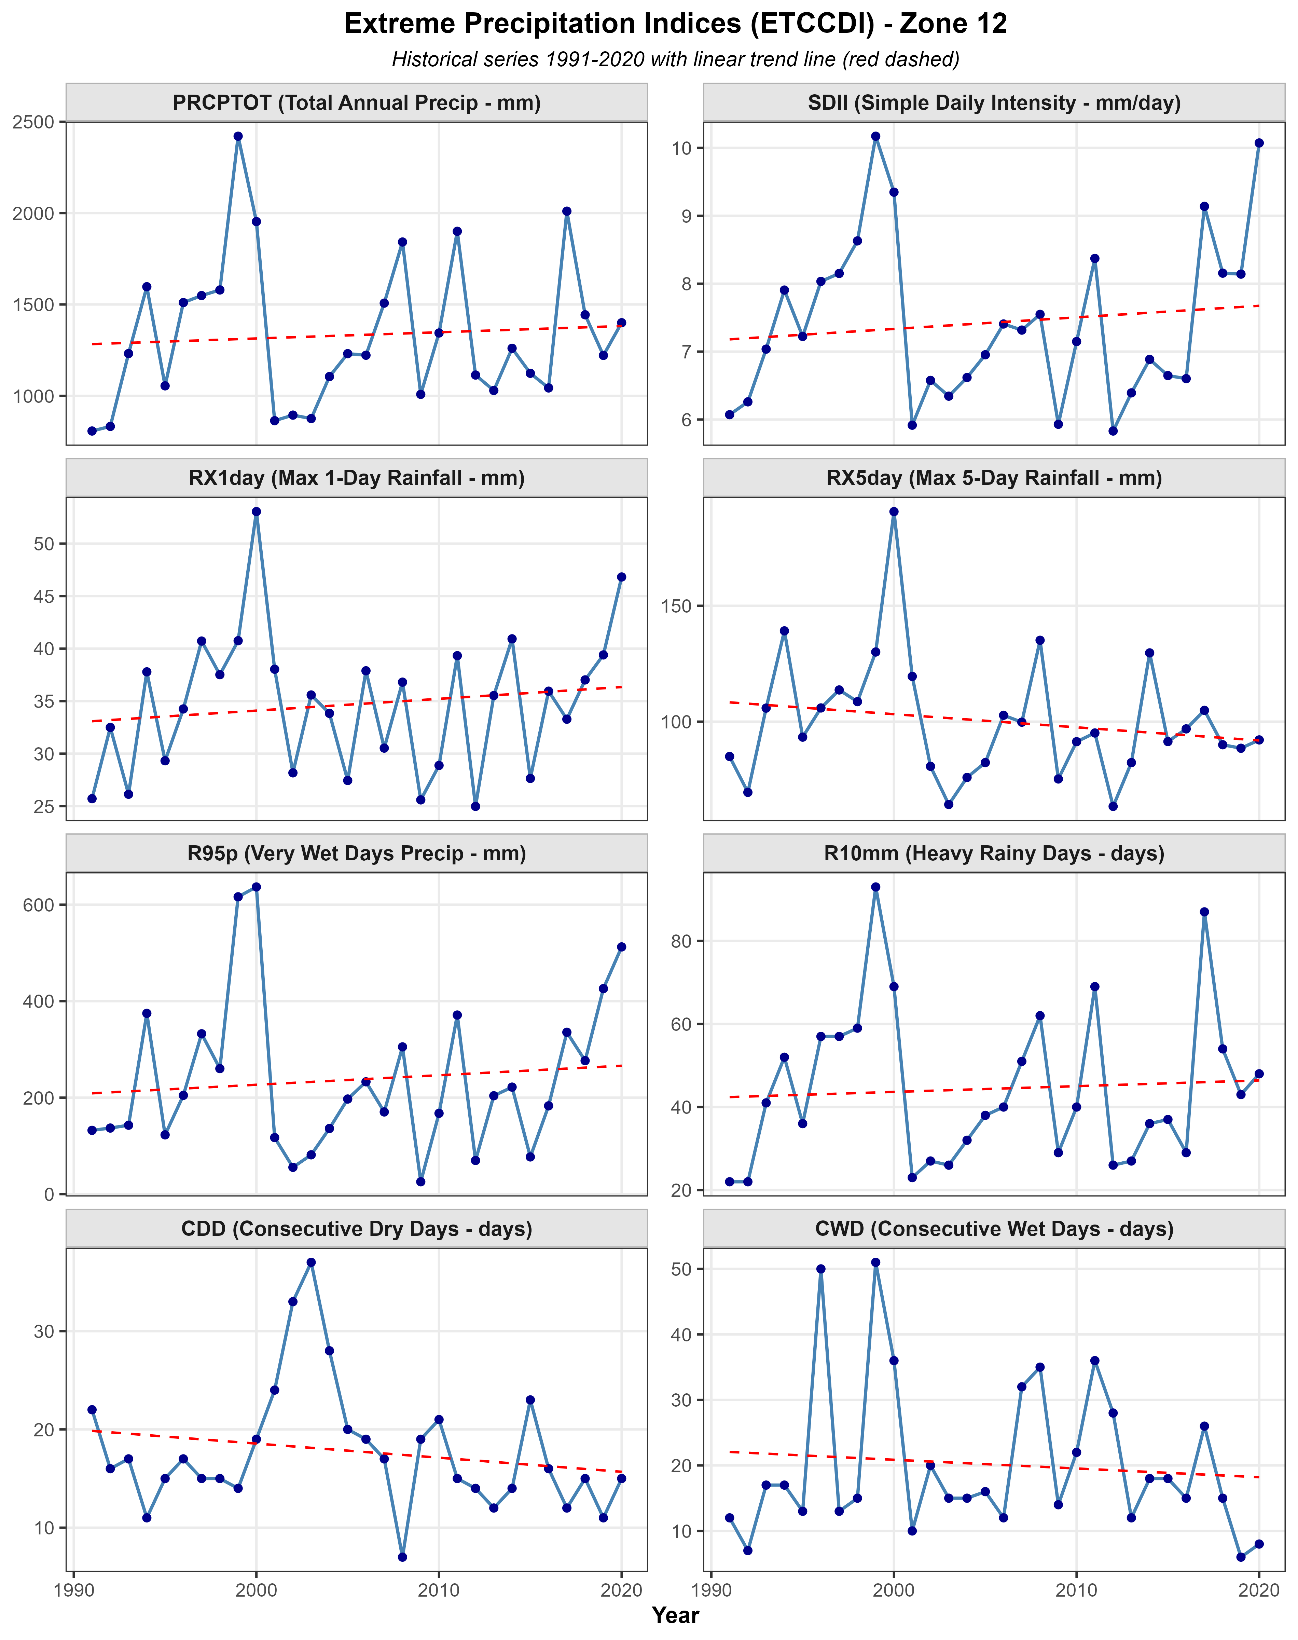


Zone 13


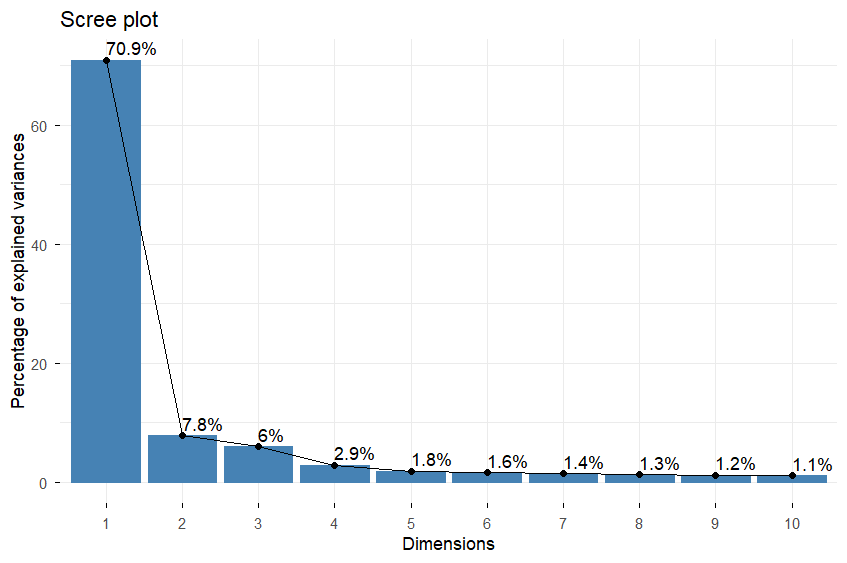

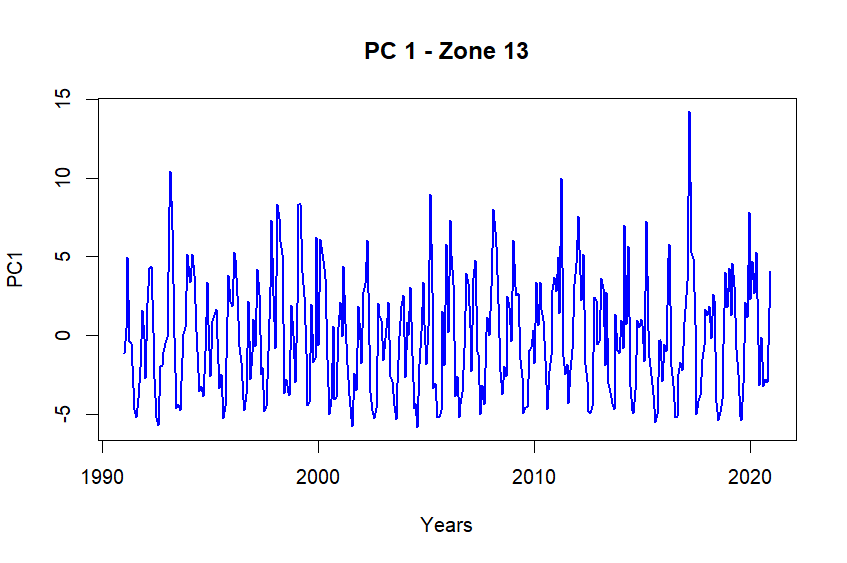

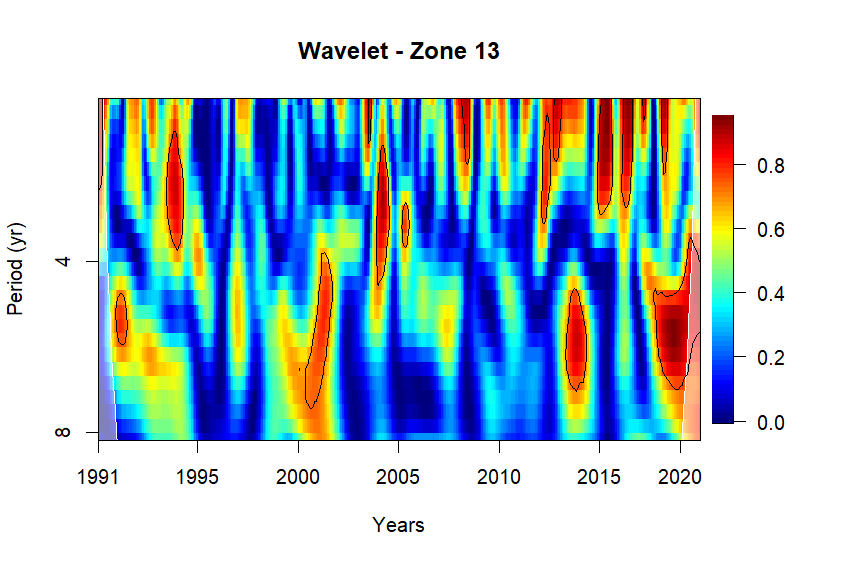

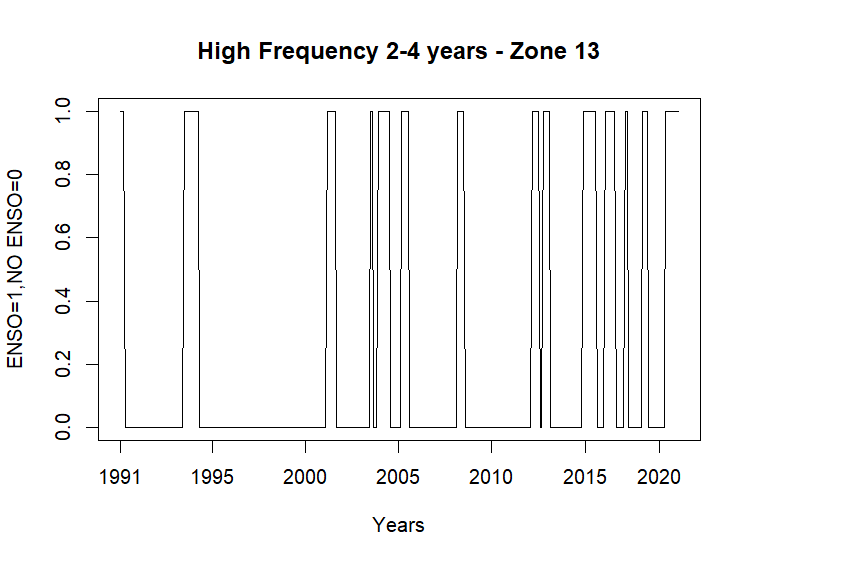

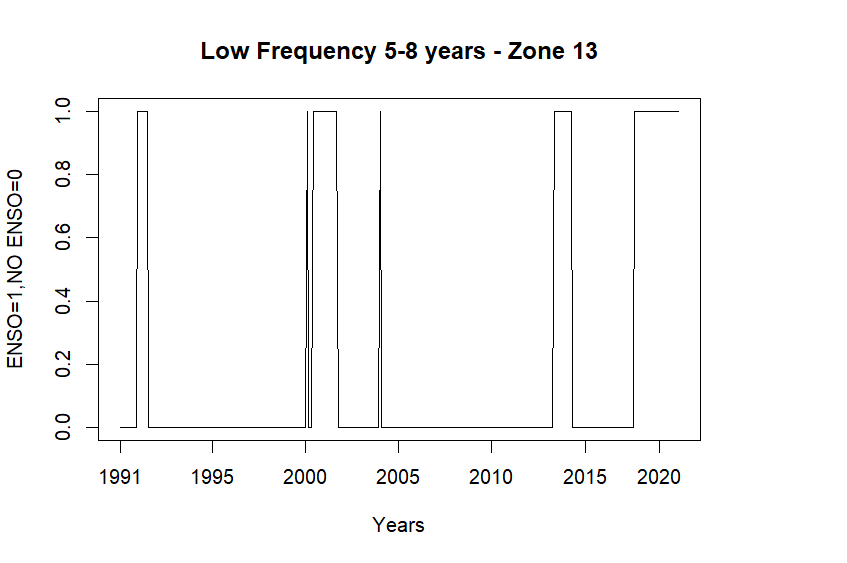


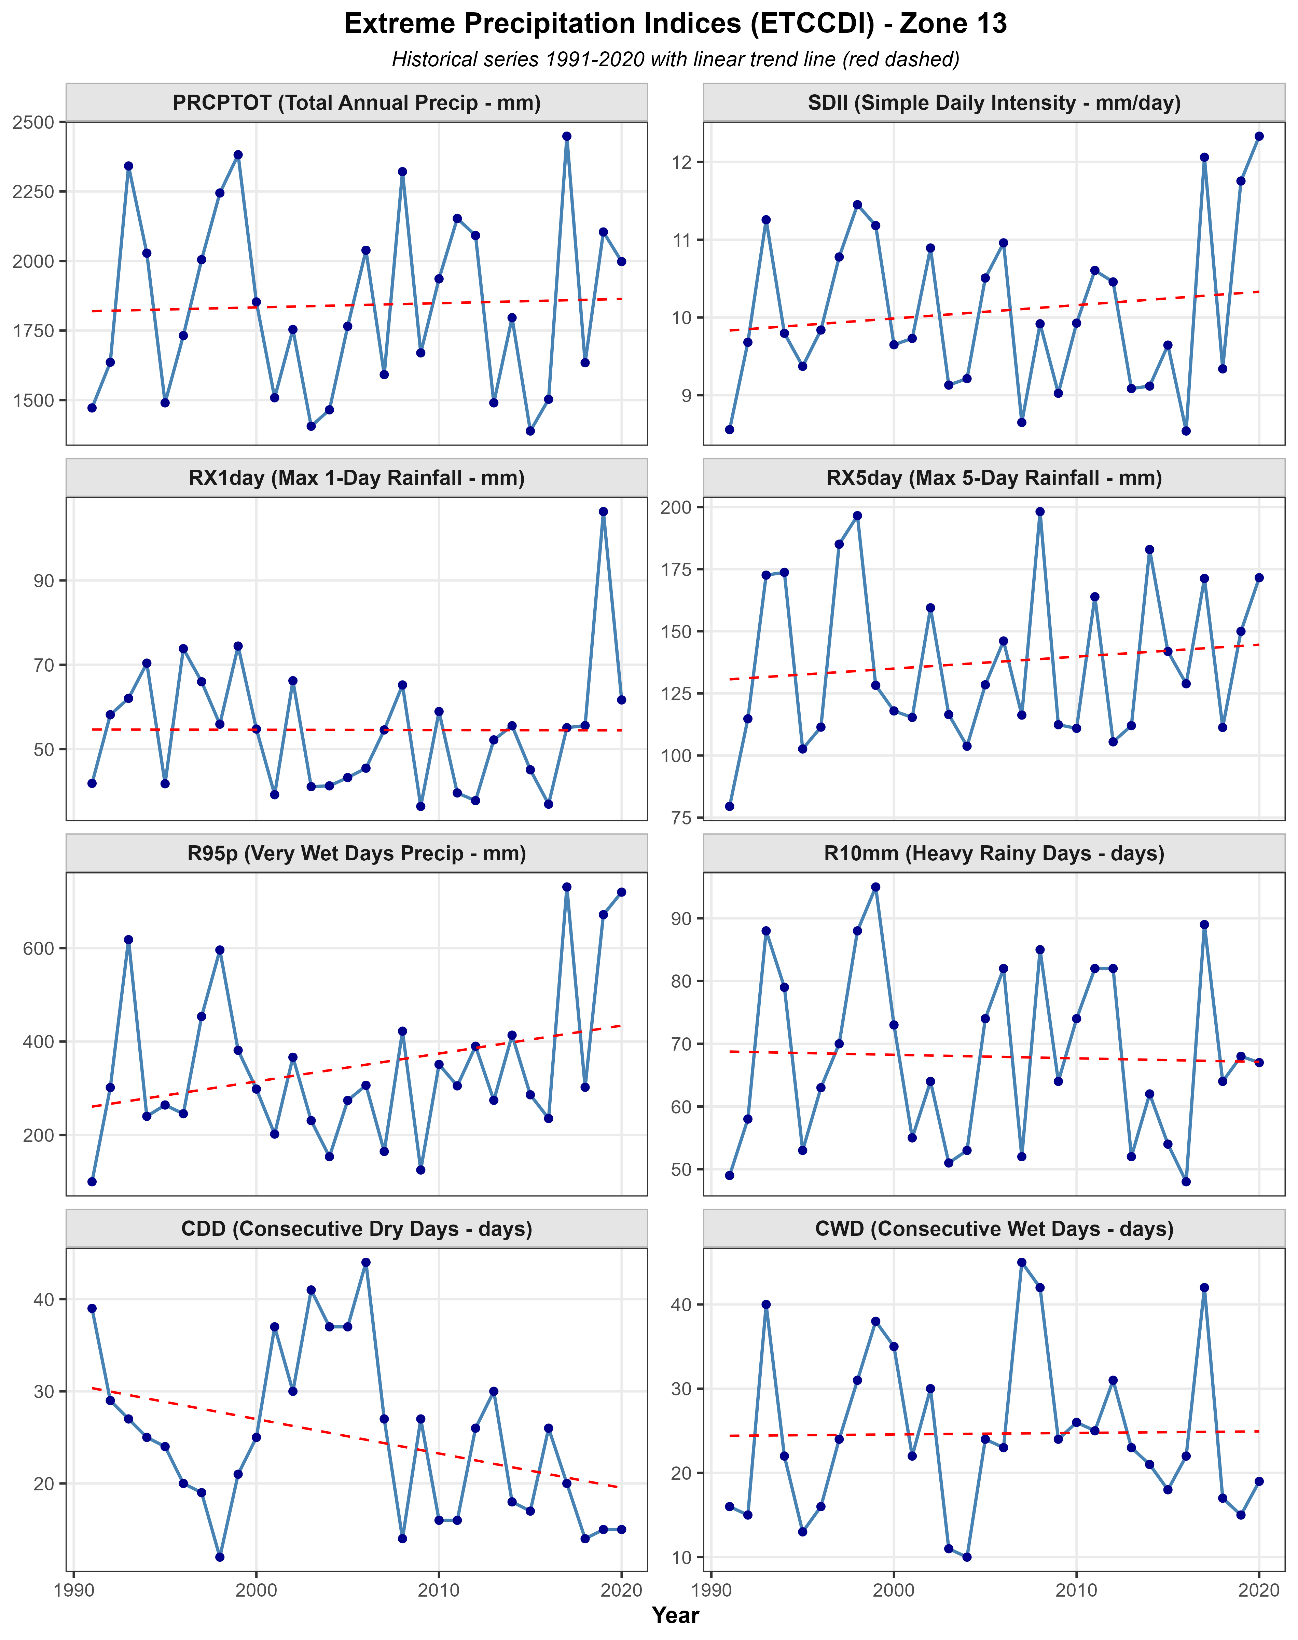


Zone 14


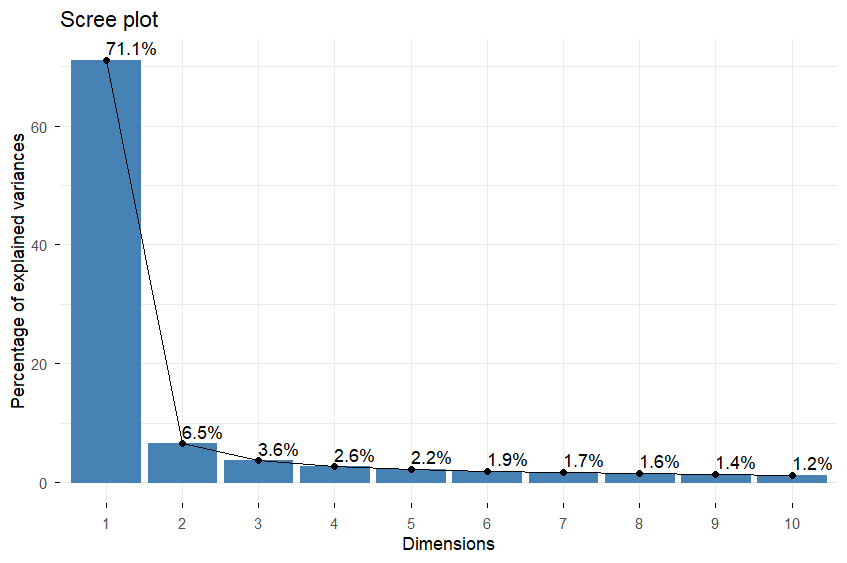

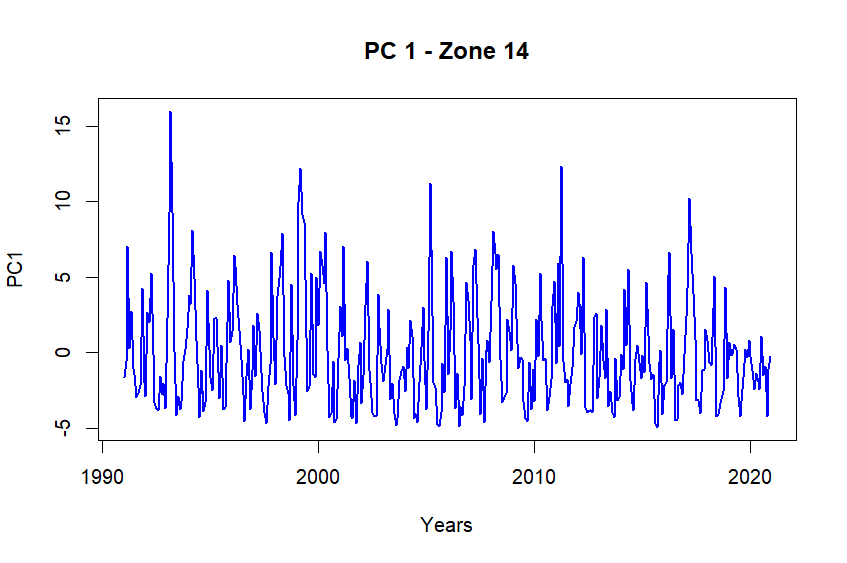

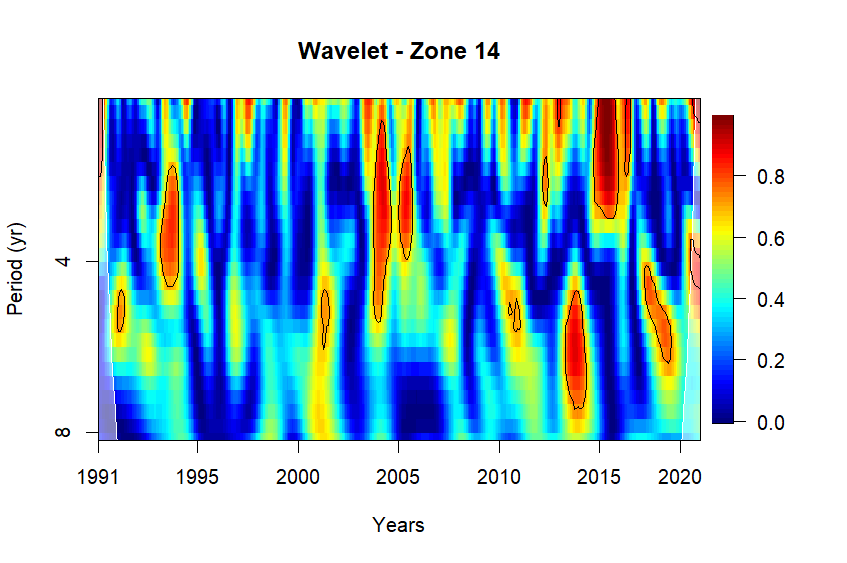

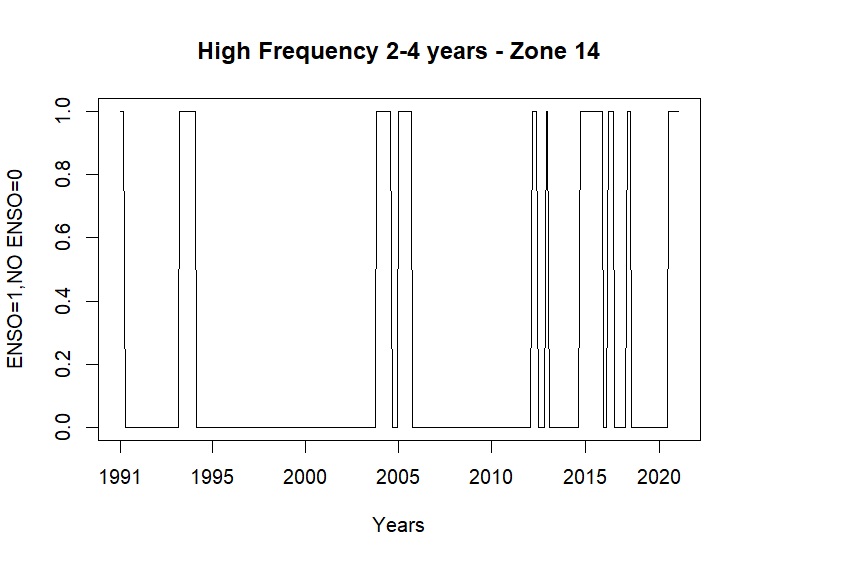

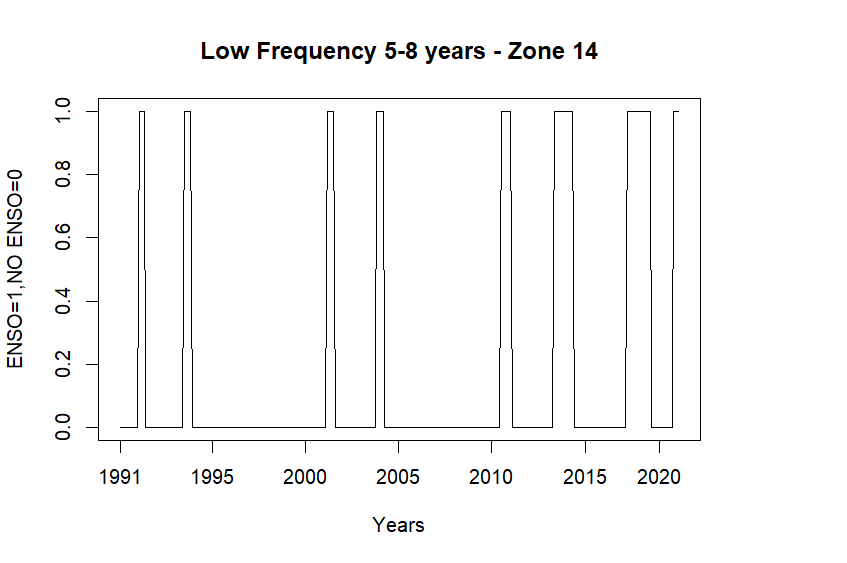


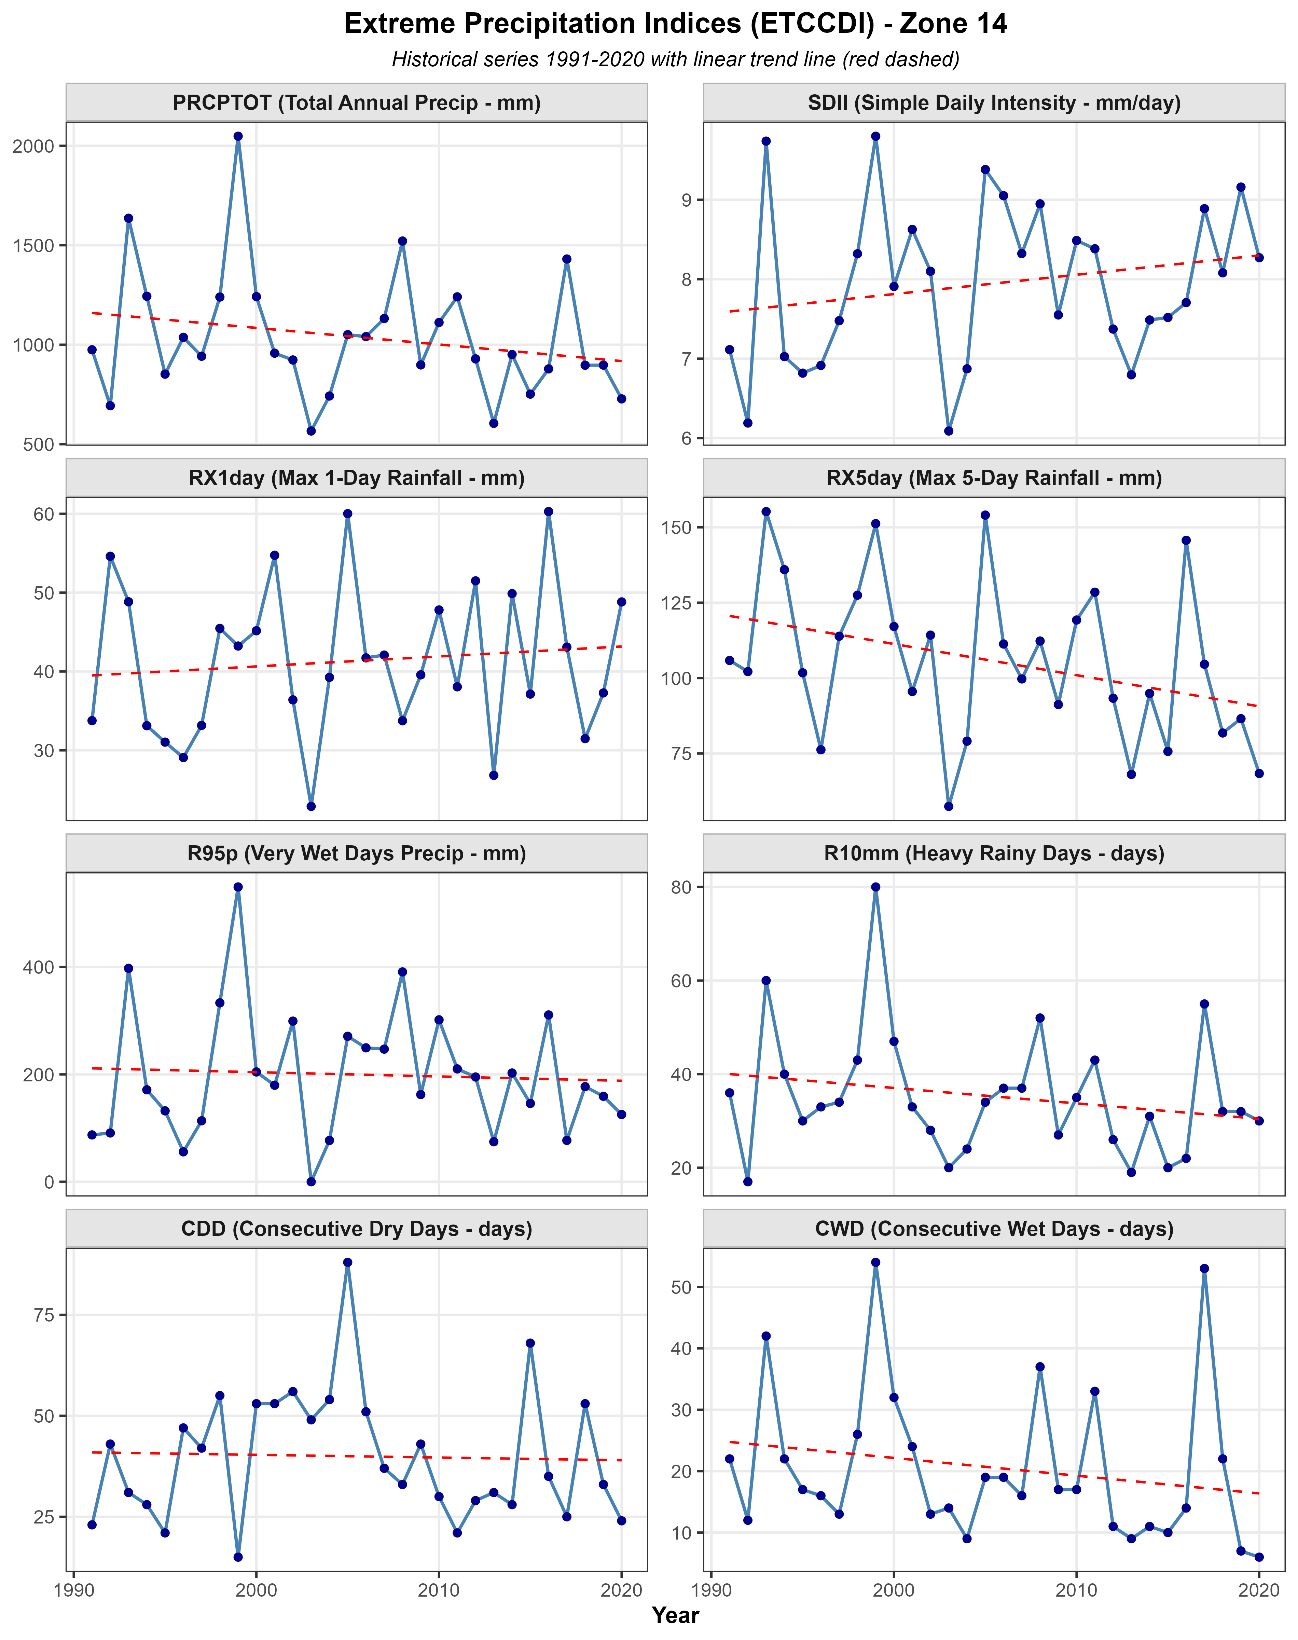


Zone 15


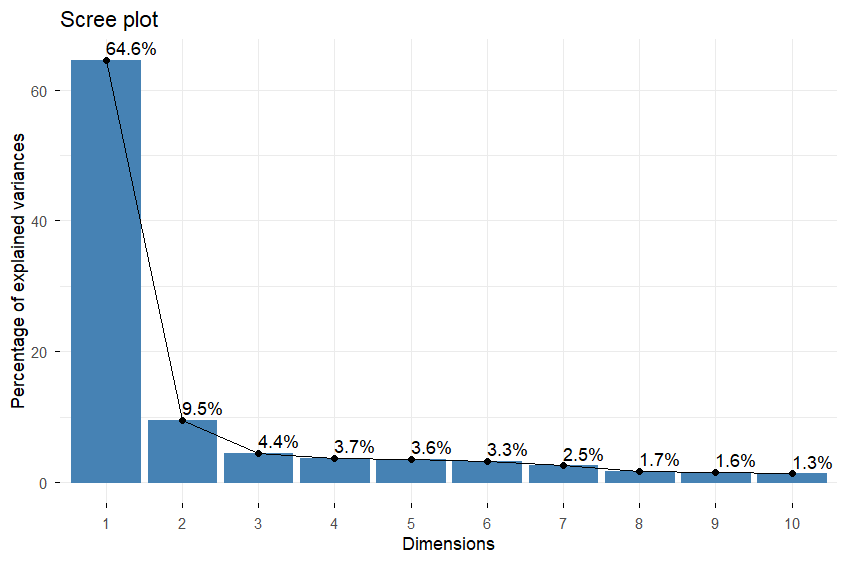

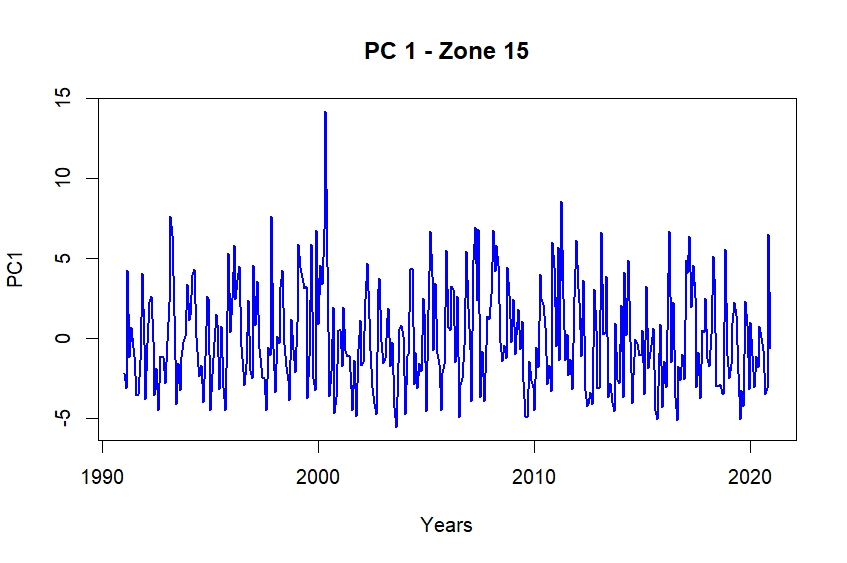

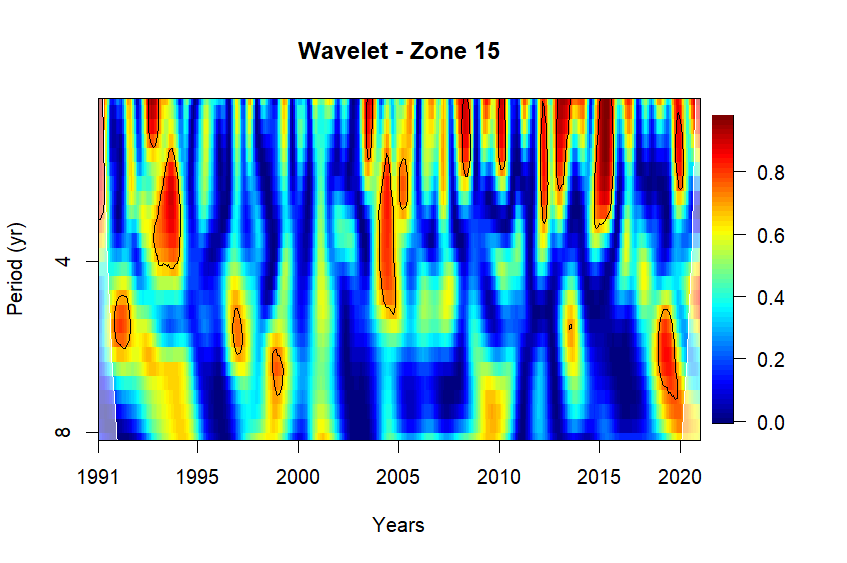

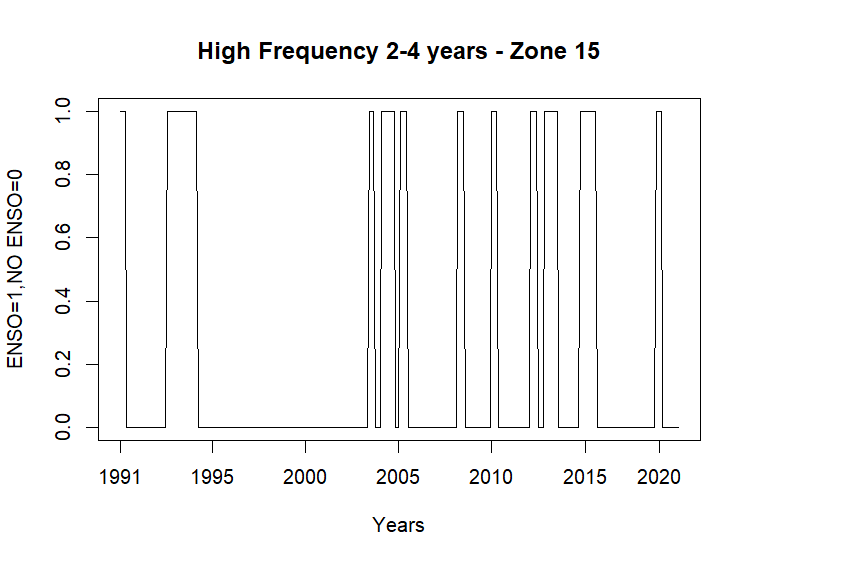

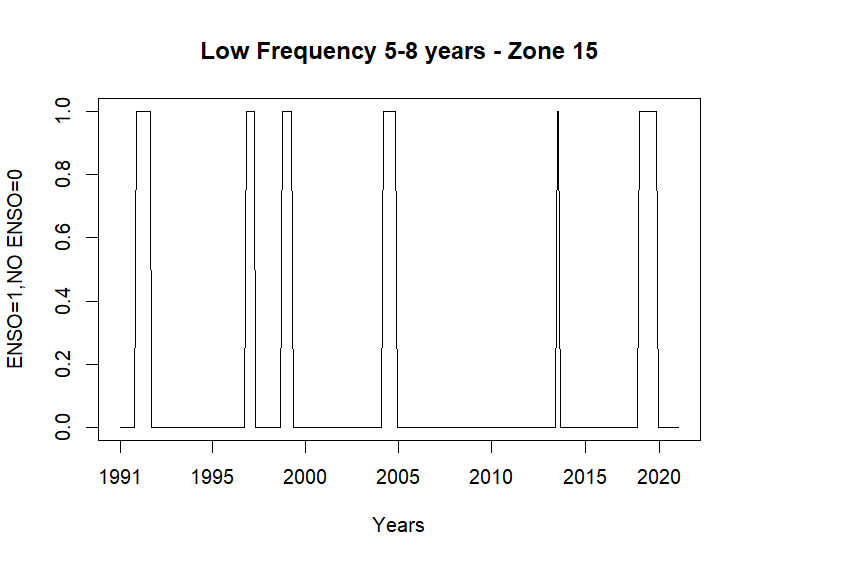


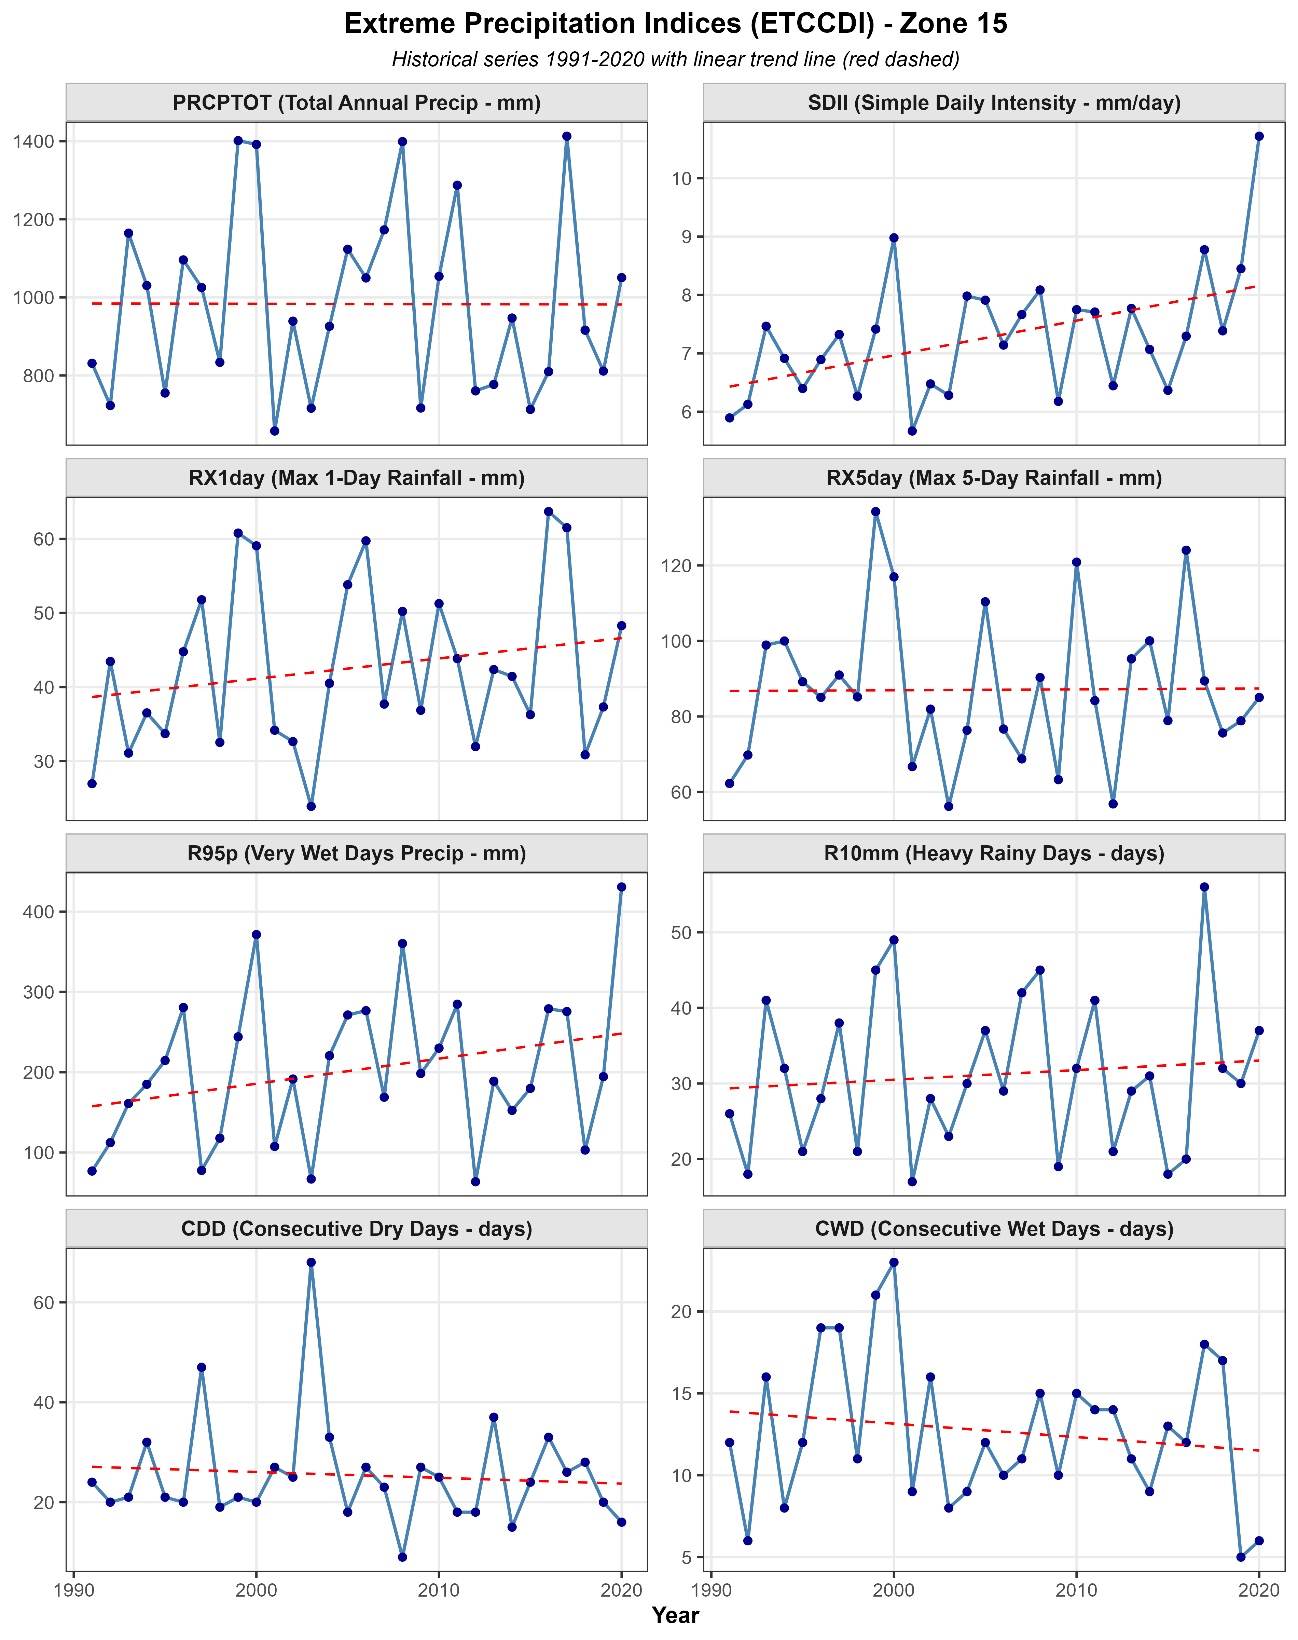


Zone 16


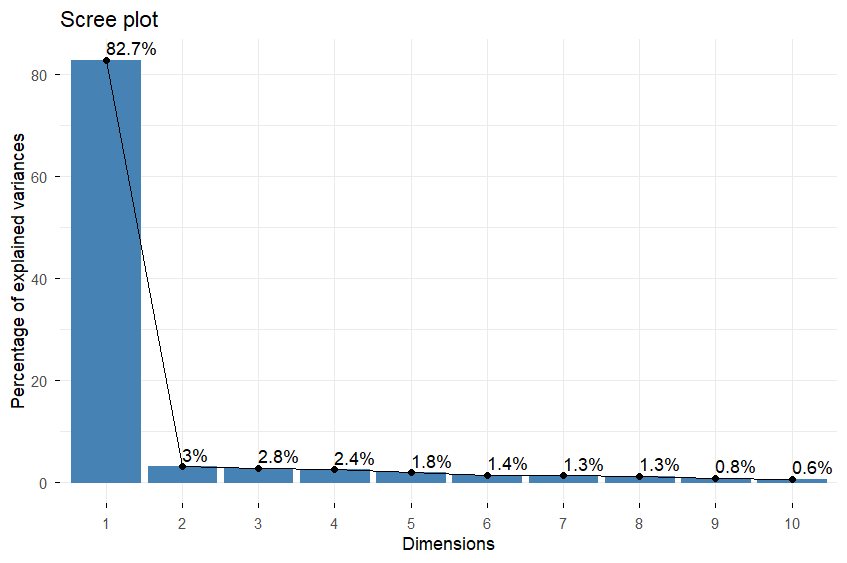

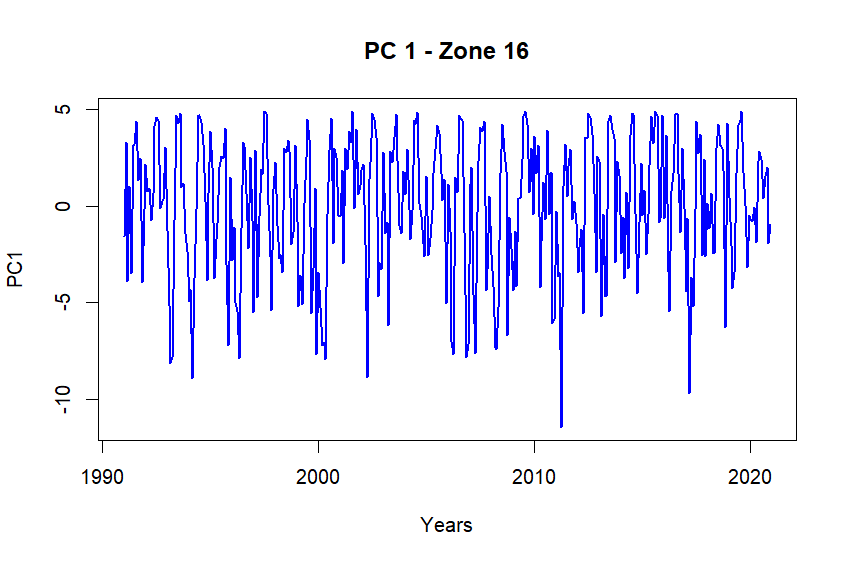

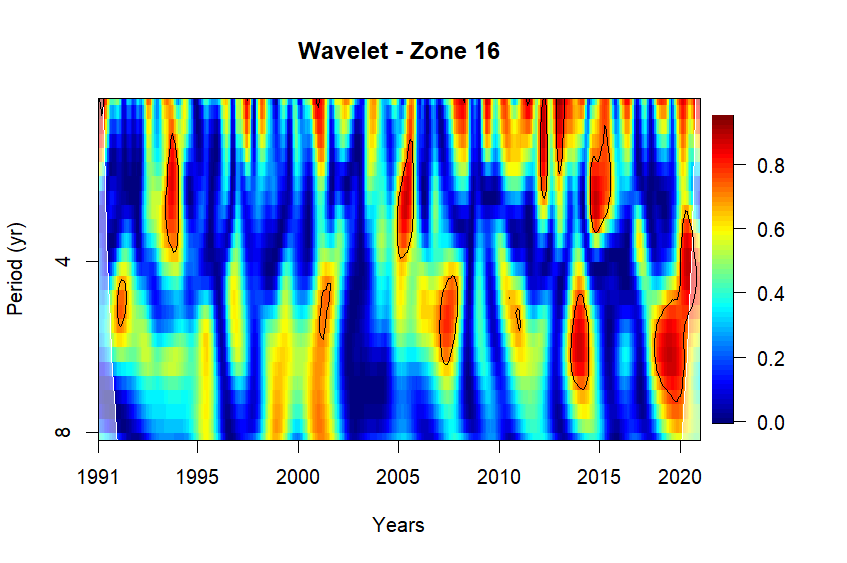

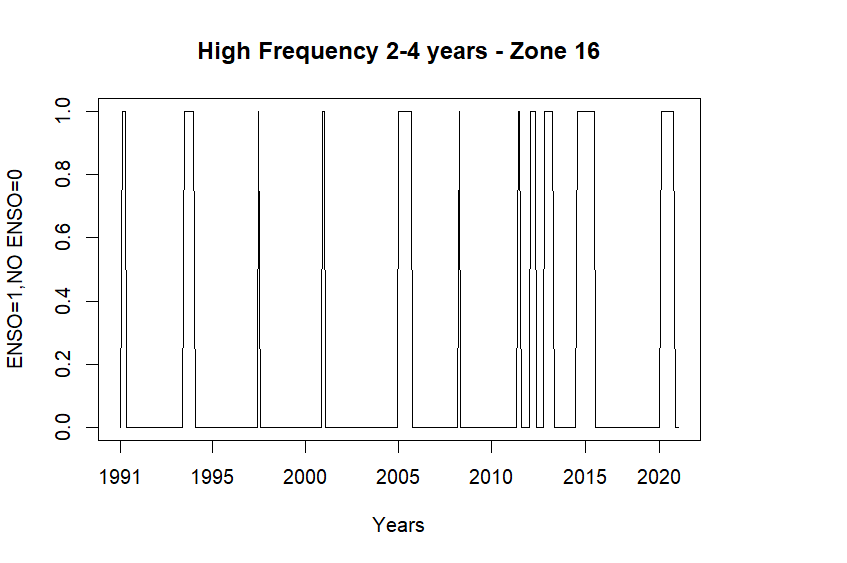

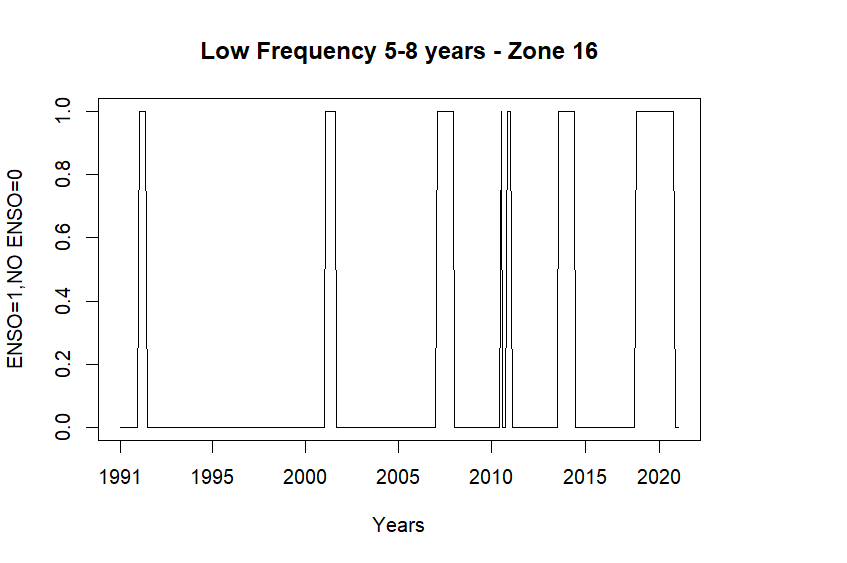


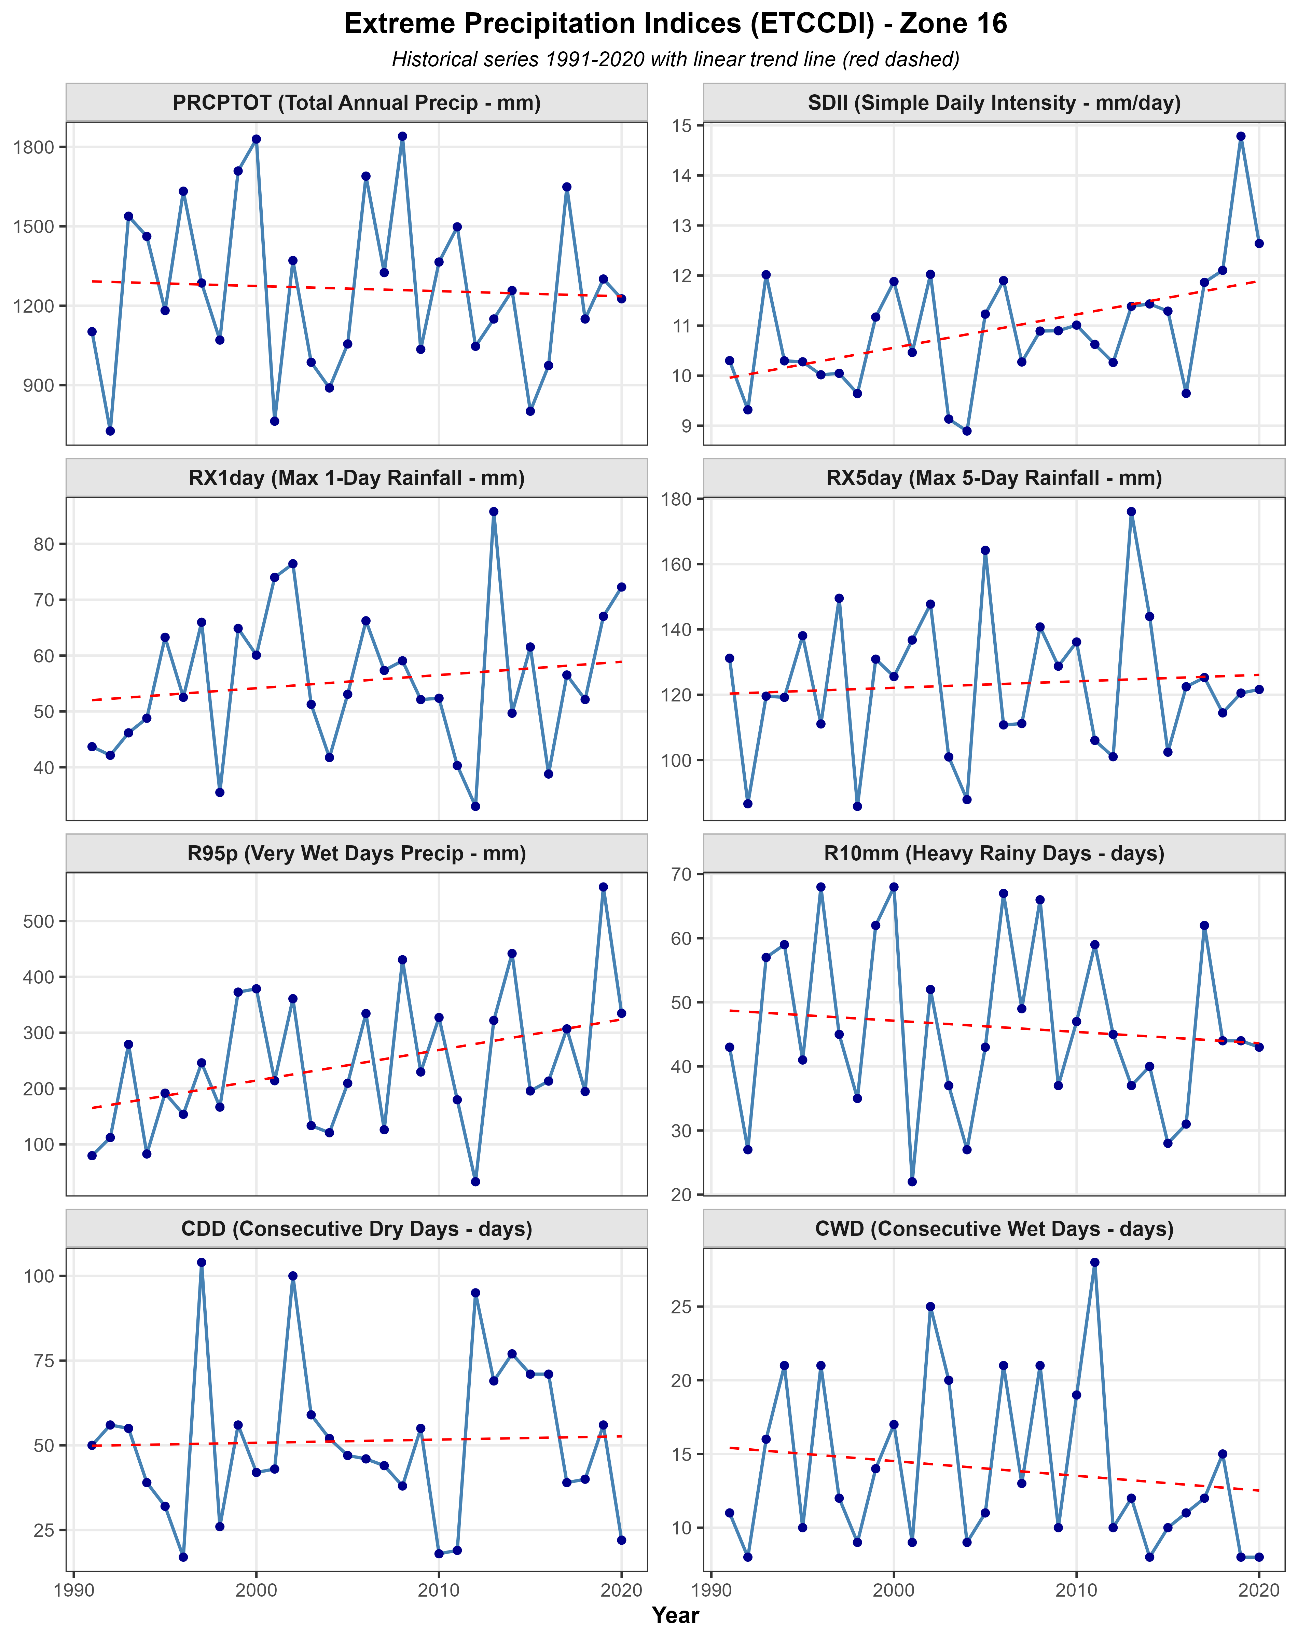


Zone 17


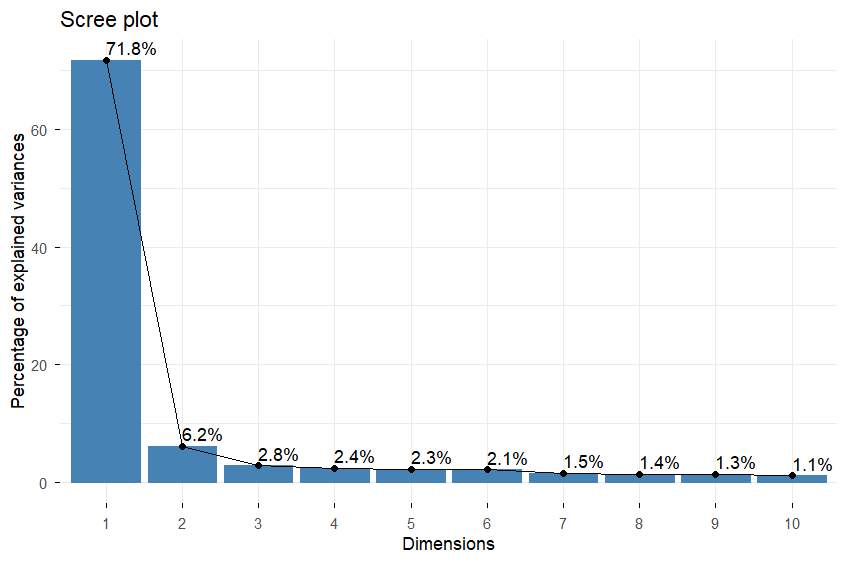

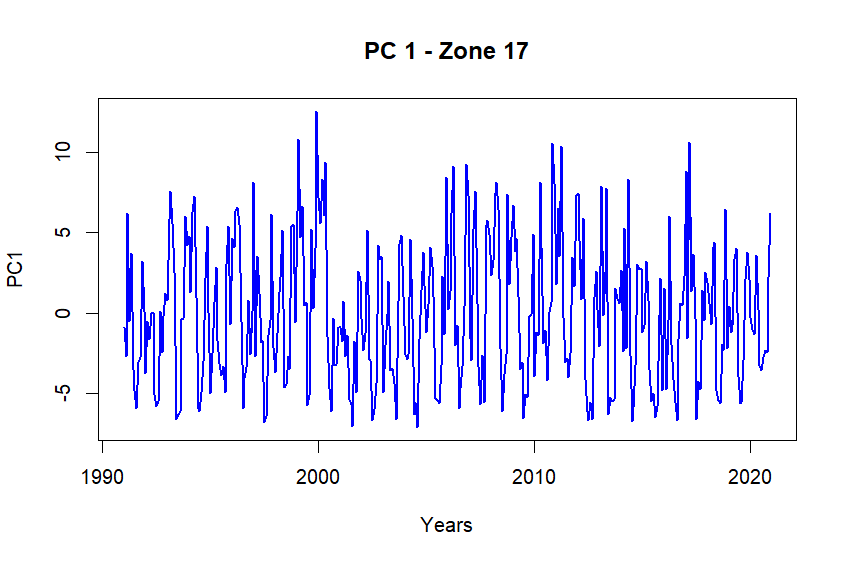

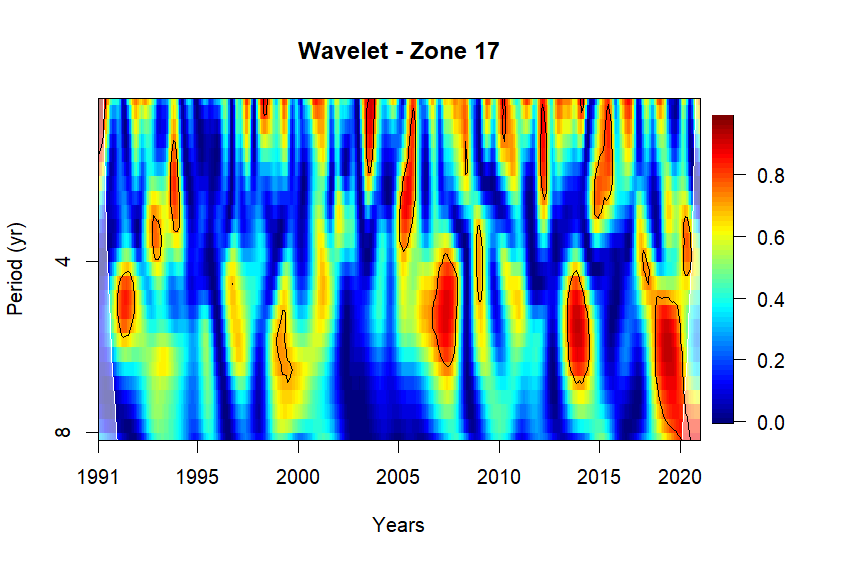

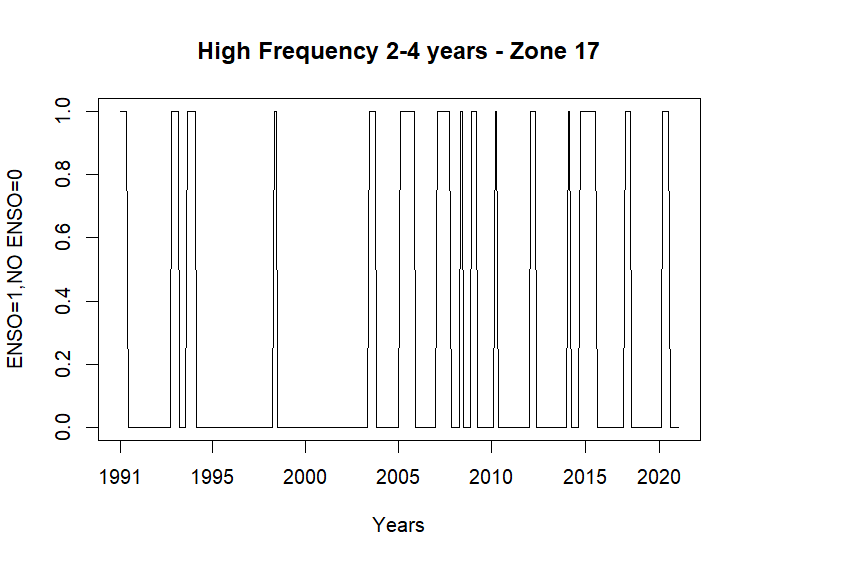


Zone 18

Zone 19

Zone 20

Zone 21

Zone 22
